# Supplementary material for: Integration of the tricarboxylic acid (TCA) cycle with cAMP signaling and Sfl2 pathways in the regulation of CO2 sensing and hyphal development in Candida albicans
Source: PLoS Genet. 2017 Aug 7;13(8):e1006949. doi: 10.1371/journal.pgen.1006949 (PMC5567665; doi:10.1371/journal.pgen.1006949)
Supplement: S1 Dataset — (XLSX) [file pgen.1006949.s012.xlsx]

## Sheet: WT air v.s.WT CO2
Differentially expressed genes of WT in air and 5%CO2.
Gene ID	Gene name	Function description	Ave.of FPKM of WT in air	Ave.of FPKM of WT in 5%CO2	Up-/Down-regulated in 5% CO2	Ave.of FPKM of sfl2/sfl2 in air	Ave.of FPKM of sfl2/sfl2 in 5%CO2	Sfl2 ChIP data
Carbohydrate metabolism
orf19.789	PYC2	Putative pyruvate carboxylase; binds biotin cofactor; repressed by Ssk1 response regulator, by benomyl treatment, or in an azole-resistant strain overexpressing MDR1; stationary phase enriched protein; flow model biofilm repressed	123.881	190.325	Up	152.632	168.557
orf19.4527	HGT1	High-affinity MFS glucose transporter; induced by progesterone, chloramphenicol, benomyl; likely essential for growth; protein newly produced during adaptation to the serum; rat catheter and Spider biofilm induced	21	16	Down	47	51	Y
orf19.5338	GAL4	Zn(II)2Cys6 transcription factor; involved in control of glycolysis; ortholog of S. cerevisiae Gal4, but not involved in regulation of galactose utilization genes; caspofungin repressed; Spider biofilm repressed	263.96	173.477	Down	216.57	188.424
orf19.5622	GLC3	Putative 1,4-glucan branching enzyme; fluconazole-induced; colony morphology-related gene regulation by Ssn6; stationary phase enriched protein	75.0589	49.3108	Down	118.019	129.042
orf19.3670	GAL1	Galactokinase; galactose, Mig1, Tup1, Hap43 regulated; fluconazole, ketoconazole-induced; stationary phase enriched protein; GlcNAc-induced protein; farnesol, hypoxia-repressed in biofilm; rat catheter and Spider biofilm induced	94.221	61.8402	Down	176.245	197.527	Y
orf19.2768	AMS1	Putative alpha-mannosidase; transcript regulated by Nrg1; induced during cell wall regeneration; flow model biofilm induced; Spider biofilm induced	95.0688	62.1036	Down	144.177	164.302
orf19.7281	PDK2	Putative pyruvate dehydrogenase kinase; mutation confers hypersensitivity to amphotericin B	29.7905	19.4316	Down	29.5186	29.2719
orf19.744	GDB1	Putative glycogen debranching enzyme; expression is regulated upon white-opaque switch; regulated by Nrg1, Tup1; rat catheter biofilm repressed	82.4906	52.7372	Down	78.3181	86.2888
orf19.4773	AOX2	Alternative oxidase; cyanide-resistant respiration; induced by antimycin A, oxidants; growth; Hap43, chlamydospore formation repressed; rat catheter, Spider biofilm induced; regulated in Spider biofilms by Bcr1, Tec1, Ndt80, Brg1	18.7004	11.839	Down	18.4164	13.4722
orf19.3150	GRE2	Putative reductase; Nrg1 and Tup1-regulated; benomyl- and hyphal-induced; macrophage/pseudohyphal-repressed; repressed by low iron; possibly involved in osmotic stress response; stationary phase enriched protein; Spider biofilm induced	46.2585	29.2123	Down	85.4252	91.1564
orf19.7021	GPH1	Putative glycogen phosphorylase; role in glycogen metabolism; regulated by Ssk1, Mig1, Tup1, Hap43; fluconazole-induced; localizes to cell surface of hyphae, not yeast; stationary phase enriched protein; Spider biofilm induced	422.179	259.42	Down	569.763	587.507
orf19.4384	HXT5	Putative sugar transporter; induced by ciclopirox olamine; Snf3-induced; alkaline repressed; colony morphology-related gene regulation by Ssn6; possibly essential gene	159.662	96.2831	Down	160.081	149.608
orf19.5615	AYR2	Putative NADPH-dependent 1-acyl dihydroxyacetone phosphate reductase; shows colony morphology-related gene regulation by Ssn6p	101.908	61.124	Down	115.289	116.006
orf19.1048	IFD6	Aldo-keto reductase; similar to aryl alcohol dehydrogenases; protein increase correlates with MDR1 overexpression (not CDR1 or CDR2) in fluconazole-resistant clinical isolates; farnesol regulated; possibly essential; Spider biofilm induced	27.2589	16.1468	Down	41.6781	39.7388
orf19.7053	GAC1	Putative regulatory subunit of ser/thr phosphoprotein phosphatase 1; fluconazole-induced; caspofungin repressed; transcript induced by Mnl1 under weak acid stress; regulated by Nrg1, Tup1; Spider and flow model biofilm induced	56.7081	33.526	Down	62.0287	63.7182	Y
orf19.5447	HGT19	Putative MFS glucose/myo-inositol transporter; 20 member family; 12 transmembrane segments, extended N terminus; expressed in rich medium; Hap43, phagocytosis, rat catheter, Spider and flow model biofilm induced	40.9503	23.8975	Down	33.0922	32.3001
orf19.769	IFE1	Putative medium-chain alcohol dehydrogenase; rat catheter and Spider biofilm repressed	17.3137	9.84896	Down	12	12
orf19.3675	GAL7	Putative galactose-1-phoshphate uridyl transferase; downregulated by hypoxia, upregulated by ketoconazole; macrophage/pseudohyphal-repressed	27.6455	15.2569	Down	39.5069	48.7318
orf19.5288	IFE2	Putative alcohol dehydrogenase; yeast-enriched transcript; Efg1-regulated; induced by prostaglandins, Hog1, fluconazole; rat catheter biofilm induced	205.629	112.698	Down	293	287
orf19.2172	ARA1	D-Arabinose dehydrogenase; dehydro-D-arabinono-1,4-lactone synthesis; active on D-arabinose, L-fucose, L-xylose, L-galactose; inhibited by metal ions, thiol group-specific reagents; induced on polystyrene adherence; Spider biofilm induced	180.047	92.2887	Down	258.728	270.381
orf19.3672	GAL10	UDP-glucose 4-epimerase; galactose utilization; mutant has cell wall defects and increased filamentation; GlcNAc-, fluconazole- and ketoconazole-induced; stationary phase enriched protein; rat catheter and flow model biofilm induced	57.4209	27.6535	Down	96.6901	100.34
orf19.2021	HGT8	High-affinity glucose transporter of the major facilitator superfamily; 20 members in the C. albicans glucose transporter family; 12 probable membrane-spanning segments; gene has intron; expressed in rich medium; flow model biofilm induced	198.01	89.4944	Down	50	39
orf19.2896	SOU1	Enzyme involved in utilization of L-sorbose; has sorbitol dehydrogenase, fructose reductase, and sorbose reductase activities; NAD-binding site motif; transcriptional regulation affected by chromosome 5 copy number; Hap43p-induced gene	190.796	86.0655	Down	123.195	112.766
orf19.2608	ADH5	Putative alcohol dehydrogenase; regulated by white-opaque switch; fluconazole-induced; antigenic in murine infection; regulated by Nrg1, Tup1; Hap43, macrophage repressed, flow model biofilm induced; Spider biofilm induced	1521.14	655.182	Down	1227	1043
orf19.7514	PCK1	Phosphoenolpyruvate carboxykinase; glucose, C-source, yeast-hypha, Hap43 regulated; fluconazole, phagocytosis, H2O2, oral candidasis, Spider/rat catheter/flow model biofilm induced; repressed in biofilm by Bcr1, Tec1, Ndt80, Rob1, Brg1	182.998	75.455	Down	262	228
TCA cycle
orf19.1480	SDH3	Putative succinate dehydrogenase; enzyme of citric acid cycle; repressed by nitric oxide; Efg1, Hap43 repressed	187.683	315.364	Up	217.711	234.736
orf19.637	SDH2	Succinate dehydrogenase, Fe-S subunit; localizes to surface of yeast cells, but not hyphae; induced in high iron and during log phase aerobic growth; repressed by nitric oxide, Hap43	132.789	206.215	Up	212.146	206.609
orf19.6632	ACO2	Putative aconitate hydratase 2; induced in high iron; regulated by Gcn4; repressed by amino acid starvation (3-AT); protein levels decrease in stationary phase yeast; flow model and Spider biofilm repressed	107.478	139.482	Up	70.3709	65.6715
orf19.4393	CIT1	Citrate synthase; induced by phagocytosis; induced in high iron; Hog1-repressed; Efg1-regulated under yeast, not hyphal growth conditions; present in exponential and stationary phase; Spider biofilm repressed; rat catheter biofilm induced	271.959	352.616	Up	249.076	239.127
orf19.1860	LSC2	Putative succinate-CoA ligase beta subunit; regulated by Mig1, Tup1; induced in high iron; protein present in exponential and stationary growth phase yeast cells; Spider biofilm repressed	219.373	276.924	Up	226.985	190.219
orf19.6385	ACO1	Aconitase; induced in high iron; 2 upstream CCAAT motifs; amino acid starvation (3-AT), amphotericin B, phagocytosis, farnesol induced; Hap43, fluconazole-repressed; Gcn4-regulated; antigenic in infection; flow and Spider biofilm repressed	568.671	695.023	Up	402.823	334.558
Glyoxylate cycle
orf19.6844	ICL1	Isocitrate lyase; glyoxylate cycle enzyme; required for virulence in mice; induced upon phagocytosis by macrophage; farnesol regulated; Pex5-dependent peroxisomal localization; stationary phase enriched; rat catheter, Spider biofilm induced	25.6982	17.9581	Down	30.8331	27.4888
orf19.4833	MLS1	Malate synthase; glyoxylate cycle enzyme; no mammalian homolog; regulated upon white-opaque switch; phagocytosis, strong oxidative stress induced; stationary phase enriched; flow model biofilm repressed; rat catheter, Spider biofilm induced	165.525	77.7234	Down	139.617	127.565
Cell adhesion & filamentation
orf19.5126	null	Putative adhesin-like protein	90.1864	148.436	Up	90.5644	87.5866
orf19.5312	MET4	Putative transcription coactivator; predicted role in sulfur amino acid metabolism; required for yeast cell adherence to silicone substrate; Spider biofilm induced	26.0258	41.3867	Up	26.8267	26.264
orf19.1133	MSB1	Putative regulator of transcription; expression in S. cerevisiae flo8 and flo11 mutants suggests a role in regulation of adhesion factors	16.1771	25.0845	Up	15	14
orf19.5760	IHD1	GPI-anchored protein; alkaline, hypha-induced; regulated by Nrg1, Rfg1, Tup1 and Tsa1, Tsa1B in minimal media at 37; oralpharyngeal candidasis induced ; Spider biofilm induced; regulated in Spider biofilms by Tec1, Efg1, Ndt80, Rob1, Brg1	30.8646	47.2929	Up	19.6876	18.3563	Y
orf19.6948	CCC1	Manganese transporter; required for normal filamentous growth; mRNA binds She3, localized to hyphal tips; repressed by NO, alkaline pH; colony morphology-related regulation by Ssn6; regulated by Sef1, Sfu1, Hap43; Spider biofilm induced	36.7995	55.7195	Up	44.8841	45.7451
orf19.3629	DSE1	Essential cell wall protein involved in cell wall integrity and rigidity; periodic mRNA expression peaks at M/G1 phase; Ace2p-induced; required for virulence in a mouse model of infection	17.3138	26.0465	Up	24.4097	27.6343
orf19.1490	MSB2	Mucin family adhesin-like protein; cell wall damage sensor; required for Cek1 phosphorylation by cell wall stress; Rim101-repressed; activation releases extracellular domain into medium; Spider biofilm induced	40	58	Up	26	24	Y
orf19.4765	PGA6	GPI-anchored cell wall adhesin-like protein; induced by high iron; upregulated upon Als2 depletion; mRNA binds She3 and is localized to hyphal tips; Spider biofilm repressed	80	116	Up	71	57
orf19.4645	BEM1	Protein required for wild-type budding, hyphal growth, and virulence in a mouse systemic infection; suppresses pseudohyphal and filamentous growth defects of various S. cerevisiae mutants and heat sensitivity of S. cerevisiae cdc24-4 mutant	21	30	Up	26	30
orf19.1621	GPA2	G-protein alpha subunit; regulates filamentous growth, copper resistance; involved in cAMP-mediated glucose signaling; reports differ on role in cAMP-PKA pathway, MAP kinase cascade; Gpr1 C terminus binds Gpa2; regulates HWP1 and ECE1	24	34	Up	34	39
Fatty acid metabolic process
orf19.1652	POX1-3	Predicted acyl-CoA oxidase; farnesol regulated; stationary phase enriched protein; Spider biofilm induced	75.4769	50.2658	Down	69.6946	58.9067
orf19.7043.1	ACB1	Protein similar to a region of acyl-coenzyme-A-binding protein; amphotericin B repressed; regulated by Nrg1, Tup1; Hap43-induced	739.695	408.025	Down	1520.32	1457.15
orf19.638	FDH1	Formate dehydrogenase; oxidizes formate to CO2; Mig1 regulated; induced by macrophages; fluconazole-repressed; repressed by Efg1 in yeast, not hyphal conditions; stationary phase enriched; rat catheter and Spider biofilm induced	179.966	93.9815	Down	223.337	212.08
orf19.7520	POT1	Putative peroxisomal 3-oxoacyl CoA thiolase; transcript regulated by Nrg1 and Mig1; farnesol regulated; Hap43-repressed	116.601	59.9524	Down	91.5553	80.5011
orf19.1089	PEX11	Putative peroxisomal membrane protein; role in fatty acid oxidation; expression is Tac1-regulated; Hms1p-dependent induction by geldamycin; Spider biofilm induced	20.7221	10.6241	Down	51.2381	60.5804
Response to stress & drug
orf19.85	GPX2	Similar to glutathione peroxidase; induced in high iron; alkaline induced by Rim101; induced by alpha factor or interaction with macrophage; regulated by Efg1; caspofungin repressed; Spider biofilm induced	17.5955	41.2158	Up	36.3482	48.8498	Y
orf19.1591	ERG10	Acetyl-CoA acetyltransferase; role in ergosterol biosynthesis; soluble in hyphae; changes in protein abundance associated with azole resistance; fluconazole or ketoconazole induced; macrophage-downregulated protein; GlcNAc-induced protein	29.7934	53.4518	Up	53.237	57.5941
orf19.1065	SSA2	HSP70 family chaperone; cell wall fractions; antigenic; beta-defensin peptides impport; ATPase domain binds histatin 5; at hyphal surface, not yeast; farnesol-repressed in biofilm; flow model, Spider biofilm repressed; caspofungin repressed	591.572	958.294	Up	335.009	453.68
orf19.2727	GRX3	Putative glutaredoxin; flucytosine induced; regulated by Gcn4p; repressed in response to amino acid starvation (3-aminotriazole treatment)	76.4455	118.347	Up	106.682	111.576
orf19.7602	AHA1	Putative Hsp90p co-chaperone; Hap43-repressed; heavy metal (cadmium) stress-induced; oxidative stress-induced via Cap1; rat catheter biofilm induced; flow model biofilm repressed	95.7775	144.821	Up	169.044	212
orf19.4631	ERG251	C-4 sterol methyl oxidase; role in ergosterol biosynthesis; Hap43-induced; ketoconazole-induced; amphotericin B, caspofungin repressed; possibly essential gene, disruptants not obtained by UAU1 method; Spider biofilm repressed	215	292	Up	433	499
orf19.6515	HSP90	Essential chaperone, regulates several signal transduction pathways and temperature-induced morphogenesis; activated by heat shock, stress; localizes to surface of hyphae, not yeast cells; mediates echinocandin and biofilm azole resistance	1692	2251	Up	1607	1681
orf19.1721	NCE103	Carbonic anhydrase; converts of CO2 to bicarbonate; essential for virulence in host niches with limited CO2, normal white-opaque switch; Mnl1-induced in weak acid stress; Hap43-induced gene; F-12/CO2, rat catheter, Spider biofilm induced	34.9757	22.6024	Down	30.6783	25.0907
Transcription factor
orf19.5992	WOR2	Zn(II)2Cys6 transcription factor; regulator of white-opaque switching; required for maintenance of opaque state; Hap43-induced	8.12945	16.9177	Up	8.49026	9.56567	Y
orf19.467	WOR3	Transcription factor; modulator of white-opaque switch; induced in opaque cells; promoter bound by Wor1; overexpression at 25 degr shifts cells to opaque state; deletion stabilizes opaque cells at higher temperatures; Spider biofilm induced	12.5748	21.3045	Up	9.43616	9.86683	Y
orf19.4649	ZCF27	Putative Zn(II)2Cys6 transcription factor	10.8336	17.0467	Up	9.8943	11.5742
orf19.4054	CTA24	Putative transcription factor; positive regulator of gene expression; Efg1-repressed; member of a family of telomere-proximal genes; transcript upregulated in RHE model of oral candidiasis	242.79	372.146	Up	266.123	269.489
orf19.6022	NRM1	Transcriptional regulator of cell cycle gene expression; regulates expression of genes involved in DNA replication stress; interacts with Swi4 and Swi6; repressed during core stress response; Spider biofilm repressed	14.6895	22.1931	Up	14	14
orf19.5908	TEC1	TEA/ATTS transcription factor; white cell pheromone response, hyphal gene regulation; required for Spider and RPMI biofilm formation; regulates BCR1; Cph2 regulated transcript; alkaline, rat catheter, Spider, flow model biofilm induced	17	25	Up	14	12	Y
orf19.599	SFL2	Transcription factor involved in regulation of morphogenesis; required for filamentous growth, for virulence in RHE model but not in mice; induced upon RHE infection but C. dubliniensis ortholog is not; Spider biofilm induced	19.3238	25.4443	Up	NA	NA
orf19.610	EFG1	bHLH transcription factor; required for white-phase cell type, RPMI and Spider biofilm formation, hyphal growth, cell-wall gene regulation; roles in adhesion, virulence; Cph1 and Efg1 have role in host cytokine response; binds E-box	69	82	Up	66.5316	63	Y
orf19.2823	RFG1	HMG domain transcriptional repressor of filamentous growth and hyphal genes; in Tup1-dependent and -independent pathways; binds DNA; transcript not regulated by oxygen or serum; not responsible for hypoxic repression; Spider biofilm induced	25	21	Down	17	17	Y
orf19.7150	NRG1	Transcription factor/repressor; regulates chlamydospore formation/hyphal gene induction/virulence and rescue/stress response genes; effects both Tup1 dependent and independent regulation; flow model biofilm induced; Spider biofilm repressed	322	231	Down	199	166	Y
orf19.6514	CUP9	Transcription factor; represses SOK1 expression in response to farnesol inhibition; yeast-hypha switch repressed; ketoconazole-induced; Plc1-regulated; colony morphology-related Ssn6 regulation; Spider, flow model biofilm induced	139.736	37.1683	Down	43.6409	33.8576	Y
Cell wall biosynthesis
orf19.4377	KRE1	Cell wall glycoprotein; beta glucan synthesis; increases glucan content in S. cerevisiae kre1, complements killer toxin sensitivity; caspofungin induced; Spider/rat catheter/flow model biofilm induced; Bcr1-repressed in RPMI a/a biofilms	23.4155	42.9307	Up	42.0555	46.6282
orf19.2952	EXG2	GPI-anchored cell wall protein, similar to S. cerevisiae exo-1,3-beta-glucosidase Exg2p; predicted Kex2p substrate; induced during cell wall regeneration; possibly an essential gene, disruptants not obtained by UAU1 method; Hap43p-repressed	12.1799	19.9917	Up	19.229	19.8485
orf19.4166	ZCF21	Predicted Zn(II)2Cys6 transcription factor; mutants display increased colonization of mouse kidneys; Spider biofilm induced	63.5423	42.1314	Down	27.4024	23.8259	Y
orf19.5612	BMT4	Beta-mannosyltransferase; for elongation of beta-mannose chains on the acid-labile fraction of cell wall phosphopeptidomannan; 9-gene family member; regulated by Tsa1, Tsa1B; flow model biofilm induced; rat catheter biofilm repressed	85.1988	54.9667	Down	82.6429	75.6736
orf19.4565	BGL2	Cell wall 1,3-beta-glucosyltransferase; mutant has cell-wall and growth defects, but wild-type 1,3- or 1,6-beta-glucan content; antigenic; virulence role in mouse systemic infection; rat catheter biofilm induced	391.781	244.143	Down	298.636	265.567
orf19.220	PIR1	1,3-beta-glucan-linked cell wall protein; N-mannosylated, O-glycosylated by Pmt1; cell wall defect in het mutant; Hog1/fluconazole/hypoxia induced; iron/Efg1/Plc1/temp regulated; flow model biofilm induced; hyphal, Spider biofilm repressed	80.1552	48.9516	Down	111.661	138.452	Y
orf19.5636	RBT5	GPI-linked cell wall protein; hemoglobin utilization; Rfg1, Rim101, Tbf1, Fe regulated; Sfu1, Hog1, Tup1, serum, alkaline pH, antifungal drugs, geldamycin repressed; Hap43 induced; required for RPMI biofilms; Spider biofilm induced	6540.49	3931.63	Down	5451.36	4181.32
orf19.999	GCA2	Predicted extracellular glucoamylase; induced by ketoconazole; possibly essential, disruptants not obtained by UAU1 method; promotes biofilm matrix formation; Spider biofilm induced; Bcr1-induced in RPMI a/a biofilms	24.5297	14.3763	Down	33.1733	32.6534
orf19.4943	PSA2	Mannose-1-phosphate guanyltransferase; Hap43, macrophage-repressed; stationary phase enriched protein; Spider biofilm induced; rat catheter biofilm repressed	249.016	143.295	Down	325.163	301.959
orf19.689	PLB1	Phospholipase B; host cell penetration and virulence in mouse systemic infection; Hog1-induced; signal sequence, N-glycosylation, and Tyr phosphorylation site; induced in fluconazole-resistant strains; rat catheter biofilm repressed	65.0134	36.4862	Down	21.9636	16.1072
orf19.3895	CHT2	GPI-linked chitinase; required for normal filamentous growth; repressed in core caspofungin response; fluconazole, Cyr1, Efg1, pH-regulated; mRNA binds She3 and is localized to yeast-form buds and hyphal tips; Spider biofilm repressed	337.934	185.184	Down	139.541	91.5062	Y
orf19.1462	SMP2	Putative Mg2+-dependent phosphatidate phosphatase; transcript regulated by Nrg1	105.953	55.5407	Down	62.8436	51.9416
orf19.5797	PLC2	Phosphatidylinositol (PtdIns)-specific phospholipase C (PI-PLC); predicted type 2 membrane protein; role in, and regulated by, filamentation, Nrg1 and Tup1; no mouse systemic virulence role; orf19.5797 and orf19.1586 are almost identical	24.5321	12.5917	Down	18.4191	17.1435	Y
orf19.1586	FGR22	Putative phosphatidylinositol-specific phospholipase C (PI-PLC); predicted type 2 membrane protein; no S. cerevisiae ortholog; role in, and regulated by, filamentation, Hap43p; almost identical to orf19.5797	44.2788	22.4514	Down	32.7911	27.4947
orf19.2531	CSP37	Hyphal cell wall protein; role in progression of mouse systemic infection; predicted P-loop, divalent cation binding, N-glycosylation sites; expressed in yeast and hyphae; hyphal downregulated; stationary-phase enriched; GlcNAc-induced	707.949	349.913	Down	1082.24	1066.06
orf19.54	RHD1	Putative beta-mannosyltransferase required for the addition of beta-mannose to the acid-labile fraction of cell wall phosphopeptidomannan; 9-gene family memebr; regulated on yeast-hypha and white-opaque switches; Spider biofilm repressed	60.588	29.7492	Down	87	90
orf19.5305	RHD3	GPI-anchored yeast-associated cell wall protein; induced in high iron; clade-associated gene expression; not essential for cell wall integrity; fluconazole-repressed; flow model and Spider biofilm repressed	156.548	74.0125	Down	111.026	78.8043	Y
orf19.7585	INO1	Inositol-1-phosphate synthase; antigenic in human; repressed by farnesol in biofilm or by caspofungin; upstream inositol/choline regulatory element; glycosylation predicted; rat catheter, flow model induced; Spider biofilm repressed	18.5259	2.32796	Down	12	11
Protein biosynthesis & modification
orf19.1847	ARO10	Aromatic decarboxylase; Ehrlich fusel oil pathway of aromatic alcohol biosynthesis; alkaline repressed; protein abundance affected by URA3 expression in CAI-4 strain; Spider biofilm induced	11.2318	32.5438	Up	31.6666	43.9157
orf19.1517	ARO3	3-deoxy-D-arabinoheptulosonate-7-phosphate synthase; aromatic amino acid synthesis; GCN-regulated; feedback-inhibited by phe if expressed in S. cerevisiae; decreased in stationary phase; flow model biofilm repressed	138.655	273.255	Up	166.551	181.842
orf19.386	SAM4	Putative S-adenosylmethionine-homocysteine methyltransferase; Hap43-repressed; alkaline induced; Spider biofilm repressed	154.989	282.952	Up	118.487	123.935
orf19.6779	PRO2	Putative gamma-glutamyl phosphate reductase with a predicted role in proline biosynthesis; regulated by Gcn2p and Gcn4p	23.6237	41.5732	Up	42.2892	51.8056
orf19.5505	HIS7	Putative imidazole glycerol phosphate synthase; histidine biosynthesis; no human/murine homolog; transcription induced by histidine starvation; regulated by Gcn2p and Gcn4p; higher protein level in stationary phase	49.0174	82.5143	Up	62.1667	72.0349
orf19.1235	HOM3	Putative L-aspartate 4-P-transferase; fungal-specific (no human or murine homolog); regulated by Gcn2 and Gcn4; early-stage flow model biofilm induced	43.3198	69.6011	Up	44.1513	51.6707
orf19.5243	TRP3	Putative bifunctional enzyme with predicted indole-3-glycerol-phosphate synthase and anthranilate synthase activities; regulated by Gcn2p and Gcn4p	37.9895	58.3998	Up	52.5112	57.4864
orf19.3099	TRP4	Predicted enzyme of amino acid biosynthesis; upregulated in biofilm; regulated by Gcn2p and Gcn4p; S. cerevisiae ortholog is Gcn4p regulated	68.1968	104.642	Up	51.4157	52.3198
orf19.2546	TRP2	Putative anthranilate synthase with a predicted role in tryptophan biosynthesis; regulated by Gcn2p and Gcn4p	68.0586	104.017	Up	78.6111	77.1673
orf19.6086	LEU4	Putative 2-isopropylmalate synthase; regulated by Nrg1, Mig1, Tup1, Gcn4; induced by human whole blood or PMNs; macrophage/pseudohyphal-repressed after 16h; Spider biofilm repressed	43.7732	66.5318	Up	28.2798	26.7163
orf19.923	THR1	Putative homoserine kinase; regulated by Tup1; amphotericin B repressed; regulated by Gcn2 and Gcn4; Spider biofilm repressed	56.3748	84.9024	Up	74.4174	84.4782
orf19.2192	GDH2	Putative NAD-specific glutamate dehydrogenase; fungal-specific; transcript regulated by Nrg1, Mig1, Tup1, and Gcn4; stationary phase enriched protein; flow model biofilm induced; Spider biofilm induced	106.572	53.9678	Down	77.5826	81.4278
Iron ion homeostasis
orf19.4802	FTH1	Protein similar to S. cerevisiae Fth1p, a high affinity iron transporter for intravacuolar stores of iron; repressed by Sfu1p, amphotericin B, caspofungin; induced by alkaline pH, ciclopirox olamine; regulated by Sef1p, Sfu1p, and Hap43p	56.0882	35.7713	Down	71.0463	75.7502
orf19.1224	FRP3	Putative ammonium transporter; upregulated in the presence of human neutrophils; fluconazole-downregulated; repressed by nitric oxide; Spider biofilm induced; rat catheter biofilm repressed	47.5756	29.5907	Down	33.8301	39.422
orf19.6070	ENA2	Putative sodium transporter; induced by ciclopirox olamine; alkaline induced by Rim101; repressed by high-level peroxide stress; induced in oral candidiasis clinical isolates; possibly essential gene; rat catheter and Spider biofilm induced	22.2191	13.7935	Down	13	11
orf19.2270	SMF12	Ortholog of S. cerevisiae Smf1; manganese transporter; Gcn4-regulated; Hap43, alkaline induced; caspofungin repressed; mutants are viable	95.82	57.3253	Down	62.6504	54.9084
orf19.1415	FRE10	Major cell-surface ferric reductase under low-iron conditions; 7 transmembrane regions and a secretion signal predicted; Tup1, Rim101, Ssn6, Hog1, caspofungin repressed; ciclopirox olamine induced; rat catheter biofilm induced	290.585	172.523	Down	253.144	219.07
orf19.655	PHO84	High-affinity phosphate transporter; transcript regulated by white-opaque switch; Hog1, ciclopirox olamine or alkaline induced; caspofungin, stress repressed; upregulated in RHE model; Spider and flow model biofilm induced, Hap43-induced	380.114	198.527	Down	146.802	76.6585
orf19.1264	CFL2	Oxidoreductase; iron utilization; Sfu1/Sef1/Hap43/Nrg1/Tup1/Rim101 regulated; alkaline/low iron/fluphenazine/ciclopirox olamine, flucytosine, fluconazole, Spider/flow model/rat catheter biofilm induced; caspofungin/amphotericin B repressed	33.2867	15.2026	Down	12	10
orf19.1614	MEP1	Ammonium permease; Mep1 more efficient permease than Mep2, Mep2 has additional regulatory role; 11 predicted transmembrane regions; low mRNA abundance; hyphal downregulated; flow model biofilm induced	58.1784	22.4978	Down	31.5148	28.4246
orf19.7114	CSA1	Surface antigen on elongating hyphae and buds; strain variation in repeat number; ciclopirox, filament induced, alkaline induced by Rim101; Efg1-, Cph1, Hap43-regulated; required for WT RPMI biofilm formation; Bcr1-induced in a/a biofilms	84.3905	28.5828	Down	51.9845	39.212
Notes:
1. Gene names and function descriptions were copied from the CGD database (http://www.candidagenome.org/).
2. Average FPKM value is higher than or equal to 15 at least in one sample
3. Fold change (air v.s. CO2) higher than or equal to 1.5
4. Up, Genes upregulated in WT in 5% CO2; Down, Genes downregulated in WT in 5% CO2.
5. Grouping of the genes according to GO terminology determined by using the online CGD GO Term Finder tool (http://www.candidagenome.org/cgi-bin/GO/goTermFinder).
6. Sfl2 ChIP: Y the gene is bound by Sfl2p[1]
[1] Znaidi S, Nesseir A, Chauvel M, Rossignol T, d’Enfert C. A comprehensive functional portrait of two heat shock factor-type transcriptional regulators involved in Candida albicans morphogenesis and virulence. 2013, 9(8): e1003519.

## Sheet: sfl2 air v.s. sfl2 CO2
Differentially expressed genes of sfl2/sfl2 mutant in air and 5%CO2.
Gene ID	Gene name	Description	Ave.of FPKM of sfl2/sfl2 in air	Ave.of FPKM of sfl2/sfl2 in 5%CO2	Up-Down-Regulation in 5%CO2
Cell adhesion & filamentation
orf19.2765	PGA62	Adhesin-like cell wall protein; putative GPI-anchor; fluconazole-induced; induced in high iron; induced during cell wall regeneration; Cyr1 or Ras1 repressed; Tbf1 induced	4339.64	2868.55	Down
orf19.691	GPD2	Surface protein similar to glycerol 3-P dehydrogenase; binds host Factor H, FHL-1, plasminogen; regulated by Ssn6, Nrg1, Efg1; induced by cell wall regeneration, macrophage/pseudohyphal growth, core stress response; Spider biofilm induced	422.125	266.814	Down
orf19.5741	ALS1	Cell-surface adhesin; adhesion, virulence, immunoprotective roles; band at hyphal base; Rfg1, Ssk1, Spider biofilm induced; flow model biofilm repressed; CAI-4 strain background effects; promoter bound Bcr1, Tec1, Efg1, Ndt80, and Brg1	17.1508	9.17239	Down
Response to stress & drug
orf19.5079	CDR4	Putative ABC transporter superfamily; fluconazole, Sfu1, Hog1, core stress response induced; caspofungin repressed; fluconazole resistance not affected by mutation or correlated with expression; rat catheter and flow model biofilm induced	10.9565	21.2393	Up
orf19.121	ARC18	Putative ARP2/3 complex subunit; mutation confers hypersensitivity to cytochalasin D	53.4216	81.8123	Up
orf19.5437	RHR2	Glycerol 3-phosphatase; roles in osmotic tolerance, glycerol accumulation in response to salt; Spider/flow model biofilm induced; regulated by macrophage, stress, yeast-hyphal switch, pheromone, Gcn4, Hog1, Nrg1, Tup1	845.745	512.229	Down
orf19.655	PHO84	High-affinity phosphate transporter; transcript regulated by white-opaque switch; Hog1, ciclopirox olamine or alkaline induced; caspofungin, stress repressed; upregulated in RHE model; Spider and flow model biofilm induced, Hap43-induced	146.802	76.6585	Down
Cell wall biosynthesis
orf19.3895	CHT2	GPI-linked chitinase; required for normal filamentous growth; repressed in core caspofungin response; fluconazole, Cyr1, Efg1, pH-regulated; mRNA binds She3 and is localized to yeast-form buds and hyphal tips; Spider biofilm repressed	139.541	91.5062	Down
Fatty acid metabolic process
orf19.4933	FAD3	Omega-3 fatty acid desaturase; production of alpha-linolenic acid, a major component of membranes; caspofungin induced; Plc1-regulated; colony morphology-related gene regulation by Ssn6; Spider biofilm induced, flow model biofilm repressed	30.3901	20.207	Down
Energy
caalfmp07	ATP8	Subunit 8 of the F0 sector of mitochondrial F1F0 ATP synthase, which is a large, evolutionarily conserved enzyme complex required for ATP synthesis	35.0218	113.059	Up
orf19.3777	IMG2	Mitochondrial ribosomal protein of the large subunit; rat catheter biofilm induced	52.8949	121.751	Up
caalfmp06	ATP6	Subunit 6 of the F0 sector of mitochondrial F1F0 ATP synthase, which is a large, evolutionarily conserved enzyme complex required for ATP synthesis	8.28985	18.8882	Up
Notes:
1. Gene names and function descriptions were copied from the CGD database (http://www.candidagenome.org/).
2. Average FPKM value is higher than or equal to 15 at least in one sample
3. Fold change (air v.s. CO2) higher than or equal to 1.5
4. Up, Genes upregulated in 5% CO2; Down, Genes downregulated in 5% CO2.
5. Grouping of the genes according to GO terminology determined by using the online CGD GO Term Finder tool (http://www.candidagenome.org/cgi-bin/GO/goTermFinder).

## Sheet: WT air v.s.sfl2 air
Differentially expressed genes between the WT and sfl2/sfl2 strains in air.
Gene ID	Gene name	Function description	Ave.of FPKM of WT in air	Ave.of FPKM of sfl2/sfl2 in air	Up-/Down-regulated in sfl2/sfl2	SFL2 expression data	Sfl2 ChIP data
Carbohydrate metabolism
orf19.3733	IDP2	Isocitrate dehydrogenase; white-opaque switch regulated; morphology-regulation by Ssn6; protein in exponential and stationary phase yeast; Hap43-repressed; Spider biofilm repressed by Bcr1, Tec1, Ndt80, Rob1, Brg1; Spider biofilm induced	38.9467	126.419	Up	Up
orf19.5113	ADH2	Alcohol dehydrogenase; soluble in hyphae; expression regulated by white-opaque switching; regulated by Ssn6; indued by Mnl1 in weak acid stress; protein enriched in stationary phase yeast cultures; Spider biofilm induced	20.241	65.5842	Up	Up
orf19.7481	MDH1	Mitochondrial malate dehydrogenase; regulated by Mig1, Tup1, white-opaque switch, phagocytosis; induced in high iron; antigenic during murine and human infection; repressed in Spider biofilms by Bcr1, Tec1, Ndt80, Rob1, Brg1	71.8021	221.981	Up	Down
orf19.3931	SFC1	Putative succinate-fumarate transporter; involved in repression of growth on sorbose; alkaline induced; rat catheter biofilm induced; Spider biofilm induced	9.42854	28.9456	Up	Down
orf19.3668	HGT2	Putative MFS glucose transporter; 20 member C. albicans glucose transporter family; 12 probable membrane-spanning segments; expressed in rich medium with 2% glucose; rat catheter and Spider biofilm induced	7.75106	23.2544	Up	Down
orf19.4317	GRE3	Putative D-xylose reductase; antigenic in murine systemic infection; soluble protein in hyphae; induced by farnesol, macrophage interaction and by Mnl1 under weak acid stress; stationary-phase enriched protein; Spider biofilm induced	199.635	461.004	Up	Up/Down
orf19.6165	KGD1	Putative 2-oxoglutarate dehydrogenase; regulated by Efg1 under yeast but not hyphal growth conditions; transcript induced in an RHE model of oral candidiasis; stationary phase enriched protein; Hap43-repressed; rat catheter biofilm induced	47.9787	98.0294	Up	Down
orf19.5437	RHR2	Glycerol 3-phosphatase; roles in osmotic tolerance, glycerol accumulation in response to salt; Spider/flow model biofilm induced; regulated by macrophage, stress, yeast-hyphal switch, pheromone, Gcn4, Hog1, Nrg1, Tup1	1955	845.745	Down	Down
orf19.7534	MIS12	Mitochondrial C1-tetrahydrofolate synthase precursor	212.966	87.8223	Down	Up/Down
orf19.2021	HGT8	High-affinity glucose transporter of the major facilitator superfamily; 20 members in the C. albicans glucose transporter family; 12 probable membrane-spanning segments; gene has intron; expressed in rich medium; flow model biofilm induced	198.01	50.4259	Down	Up
Fatty acid metabolic process
orf19.3682	CWH8	Putative dolichyl pyrophosphate (Dol-P-P) phosphatase; ketoconazole-induced; expression is increased in a fluconazole-resistant isolate; clade-associated gene expression; Hap43p-induced gene	81.8707	206.284	Up	Down
orf19.1089	PEX11	Putative peroxisomal membrane protein; role in fatty acid oxidation; expression is Tac1-regulated; Hms1p-dependent induction by geldamycin; Spider biofilm induced	20.7221	51.2381	Up	Up
orf19.633	CRG1	Methyltransferase involved in sphingolipid homeostasis, methylates a drug cantharidin; decreased expression in hyphae compared to yeast; expression regulated during planktonic growth; flow model biofilm induced; Hap43-repressed gene	18.6023	43.487	Up
orf19.250	SLC1	Putative fatty acyltransferase; protein repressed during the mating process	29.1777	63.1239	Up	Down
orf19.7043.1	ACB1	Protein similar to a region of acyl-coenzyme-A-binding protein; amphotericin B repressed; regulated by Nrg1, Tup1; Hap43-induced	739.695	1520.32	Up	Up
orf19.6327	HET1	Putative sphingolipid transfer protein; involved in localization of glucosylceramide which is important for virulence; Spider biofilm repressed	756.19	347.874	Down	Up
orf19.4933	FAD3	Omega-3 fatty acid desaturase; production of alpha-linolenic acid, a major component of membranes; caspofungin induced; Plc1-regulated; colony morphology-related gene regulation by Ssn6; Spider biofilm induced, flow model biofilm repressed	66.6577	30.3901	Down	Up
orf19.689	PLB1	Phospholipase B; host cell penetration and virulence in mouse systemic infection; Hog1-induced; signal sequence, N-glycosylation, and Tyr phosphorylation site; induced in fluconazole-resistant strains; rat catheter biofilm repressed	65.0134	21.9636	Down	Down
orf19.689	PLB1	Phospholipase B; host cell penetration and virulence in mouse systemic infection; Hog1-induced; signal sequence, N-glycosylation, and Tyr phosphorylation site; induced in fluconazole-resistant strains; rat catheter biofilm repressed	65.0134	21.9636	Down	Down
Cell adhesion & filamentation
orf19.6099	CCT8	Chaperonin-containing T-complex subunit; role in hyphal morphogenesis, particularly starvation-induced; essential; expression in S. cerevisiae inhibits Ras2-mediated pathways; CCT8 and TRP1 overlap; Spider biofilm repressed	401.244	200.529	Down	Up	Y
orf19.5032	SIM1	Adhesin-like protein; involved in cell wall maintenance, redundant with Sun41; possibly secreted; macrophage-repressed; repressed by Rim101, Cyr1, Ras1; Spider biofilm induced	697.01	340.055	Down	Down
orf19.5736	ALS5	ALS family adhesin; highly variable; expression in S. cerevisiae causes adhesion to human epithelium, endothelium or ECM, endothelial invasiveness by endocytosis and, at high abundance, ECM-induced aggregation; can form amyloid fibrils	16.2977	7.51586	Down	Down
orf19.3884	FGR50	Protein lacking an ortholog in S. cerevisiae; transposon mutation affects filamentous growth; Spider biofilm repressed	74.1764	32.7031	Down	Down
orf19.6928	SAP9	Secreted aspartyl protease; roles in adhesion, cell surface integrity; induced by antifungal drugs, stationary phase, or in white-phase cells; farnesol-downregulated in biofilm; autocatalytic processing; GPI-anchor; Spider biofilm induced	113.205	48.8773	Down	Up
orf19.2767	PGA59	Adhesin-like cell wall protein; putative GPI-anchor; colony morphology-related gene regulation by Ssn6; Hap43-induced; Spider biofilm repressed	18932.3	7772.31	Down	Down
orf19.3839	SAP10	Secreted aspartyl protease; roles in adhesion, virulence (RHE model), cell surface integrity; distinct specificity from Sap9; at cell membrane and wall; GPI-anchored; induced in low iron; Tbf1-activated; Spider biofilm induced	32.8605	13.2276	Down	Up
orf19.4555	ALS4	GPI-anchored adhesin; role in adhesion, germ tube induction; growth, temperature regulated; expressed during infection of human buccal epithelial cells; repressed by vaginal contact; biofilm induced; repressed during chlamydospore formation	18.6607	3.77384	Down	Down
Response to stress & drug
orf19.4526	HSP30	Putative heat shock protein; fluconazole repressed; amphotericin B induced; Spider biofilm induced; rat catheter biofilm induced	12.0779	80.8364	Up	Up
orf19.822	HSP21	Small heat shock protein; role in stress response and virulence; fluconazole-downregulated; induced in cyr1 or ras1 mutant; stationary phase enriched protein; detected in some, not all, biofilm extracts; Spider biofilm induced	2701.42	10696.7	Up	Up
orf19.4436	GPX3	Putative glutathione peroxidase involved in Cap1p-dependent oxidative stress response, required for Cap1p oxidation in response to H2O2; planktonic growth-induced	10.993	28.9827	Up
orf19.113	CIP1	Possible oxidoreductase; transcript induced by cadmium but not other heavy metals, heat shock, yeast-hypha switch, oxidative stress (via Cap1), or macrophage interaction; stationary phase enriched protein; Spider biofilm induced	26.8876	70.328	Up	Up
orf19.2016	ERG28	Protein of unknown function	91.8057	197.445	Up		Y
orf19.85	GPX2	Similar to glutathione peroxidase; induced in high iron; alkaline induced by Rim101; induced by alpha factor or interaction with macrophage; regulated by Efg1; caspofungin repressed; Spider biofilm induced	17.5955	36.3482	Up	Up
orf19.4491	ERG20	Putative farnesyl pyrophosphate synthetase involved in isoprenoid and sterol biosynthesis, based on similarity to S. cerevisiae Erg20p; likely to be essential for growth, based on an insertional mutagenesis strategy	231.896	474.785	Up	Up
orf19.4631	ERG251	C-4 sterol methyl oxidase; role in ergosterol biosynthesis; Hap43-induced; ketoconazole-induced; amphotericin B, caspofungin repressed; possibly essential gene, disruptants not obtained by UAU1 method; Spider biofilm repressed	215.358	432.719	Up	Up
orf19.1164	GAR1	Putative H/ACA snoRNP pseudouridylase complex protein; mutation confers hypersensitivity to tubercidin (7-deazaadenosine); macrophage/pseudohyphal-induced; Spider biofilm repressed	373.637	183.204	Down	Up/Down
orf19.333	FCY2	Purine-cytosine permease of pyrimidine salvage; mutation associated with resistance to flucytosine in clinical isolates; transposon mutation affects filamentation; farnesol-upregulated in biofilm	27.6258	13.5156	Down	Up
orf19.6091	RIM8	Beta-arrestin-like protein; involved in pH response; required for pathogenesis, activation of Rim101 and alkaline pH-induced hyphal growth; colony morphology-related gene regulation by Ssn6p negative feedback regulation target	74.4258	35.8596	Down	Up
orf19.367	CNH1	Na+/H+ antiporter; required for wild-type growth, cell morphology, and virulence in a mouse model of systemic infection; not transcriptionally regulated by NaCl; fungal-specific (no human or murine homolog)	134.613	60.0771	Down	Up/Down
orf19.7655	RPO21	RNA polymerase II; ortholog of S. cerevisiae Rpo21, transposon mutation affects filamentous growth; flow model biofilm repressed	160.875	70.8052	Down	Down
orf19.655	PHO84	High-affinity phosphate transporter; transcript regulated by white-opaque switch; Hog1, ciclopirox olamine or alkaline induced; caspofungin, stress repressed; upregulated in RHE model; Spider and flow model biofilm induced, Hap43-induced	380.114	146.802	Down	Down
orf19.3740	PGA23	Putative GPI-anchored protein of unknown function; Rim101-repressed; Cyr1-regulated; colony morphology-related gene regulation by Ssn6	43.9381	6.32576	Down	Up
Transcription factor							Y
orf19.740	HAP41	Putative Hap4-like transcription factor; Hap43-repressed; not required for response to low iron; induced by Mnl1 under weak acid stress; Spider biofilm induced	67.5649	152.357	Up	Down
orf19.517	HAP31	Putative CCAAT-binding transcription factor; regulates CYC1; required for resistance to rapamycin, copper; induced in high iron; repressed in low iron; Sef1, Sfu1, and Hap43 regulated; rat catheter and Spider biofilm induced	72.3222	147.011	Up	Up
orf19.422	SPT20	Putative transcription factor; downregulated upon adherence to polystyrene; flucytosine repressed	25.5211	12.6816	Down	Up/Down
orf19.7136	SPT6	Putative transcription elongation factor; transposon mutation affects filamentous growth; transcript induced in an RHE model of oral candidiasis and in clinical isolates from oral candidiasis	189.74	85.7485	Down	Up
orf19.6713	WOR4	Protein of unknown function	31.1257	14.0113	Down		Y
orf19.6734	TCC1	Putative transcription factor/corepressor; regulation of filamentation and virulence; interacts with Tup1; regulates hypha-specific gene expression; contains 4 tetratricopeptide repeat (TPR) motifs; flucytosine repressed; Tbp1-induced	74.3011	32.5404	Down	Down	Y
orf19.4166	ZCF21	Predicted Zn(II)2Cys6 transcription factor; mutants display increased colonization of mouse kidneys; Spider biofilm induced	63.5423	27.4024	Down	Down
orf19.6182	ZCF34	Zn(II)2Cys6 transcription factor involved in regulation of multidrug resistance via control of CDR1 expression; mutants display decreased colonization of mouse kidneys; required for yeast cell adherence to silicone substrate	44.6861	19.1753	Down	Down
orf19.6645	HMO1	HMG-box transcription factor; binds upstream of hexose and ergosterol metabolism and cell cycle genes; activates pseudohyphal growth when expressed in S. cerevisiae; repressed in hyphae; Spider biofilm repressed	354.021	150.944	Down	Down
orf19.6109	TUP1	Transcriptional corepressor; represses filamentous growth; regulates switching; role in germ tube induction, farnesol response; in repression pathways with Nrg1, Rfg1; farnesol upregulated in biofilm; rat catheter, Spider biofilm repressed	795.668	332.987	Down	Down
orf19.2119	NDT80	Ortholog of Ndt80; meiosis-specific transcription factor; activator of CDR1 induction by antifungal drugs; required for wild-type drug resistance and for Spider biofilm formation; transcript induced by antifungal drug treatment	199.761	73.0484	Down	Down	Y
orf19.6514	CUP9	Transcription factor; represses SOK1 expression in response to farnesol inhibition; yeast-hypha switch repressed; ketoconazole-induced; Plc1-regulated; colony morphology-related Ssn6 regulation; Spider, flow model biofilm induced	139.736	43.6409	Down	Down	Y
orf19.4056	BRG1	Transcription factor; recruits Hda1 to hypha-specific promoters; Tn mutation affects filamentation; Hap43-repressed; Spider and flow model biofilm induced; required for Spider biofilm formation; Bcr1-repressed in RPMI a/a biofilms	54.3764	15.4379	Down	Up
Cell wall biosynthesis
orf19.1105.2	PGA56	Regulator of sorbose utilization; putative GPI-anchor; hypha and cell wall regeneration induced; colony morphology-related gene regulation by Ssn6; induced by Tbf1, Hap43; Spider biofilm induced	3.84842	23.8194	Up	Up
orf19.6420	PGA13	GPI-anchored cell wall protein involved in cell wall synthesis; required for normal cell surface properties; induced in oralpharyngeal candidasis; Spider biofilm induced; Bcr1-repressed in RPMI a/a biofilms	71.7532	273.024	Up	Up
orf19.1232	VRG4	GDP-mannose transporter; essential; required for glycosylation, hyphal growth; functional homolog of S. cerevisiae Vrg4p, which imports GDP-mannose from cytoplasm to Golgi for protein and lipid mannosylation; no mammalian homolog	14.4868	50.6531	Up	Up/Down
orf19.3893	SCW11	Cell wall protein; repressed in ace2 mutant; repressed in core caspofungin response; induced in high iron; possibly an essential gene, disruptants not obtained by UAU1 method; rat catheter and Spider biofilm repressed	66.756	30.9762	Down	Down
orf19.6105	MVD	Mevalonate diphosphate decarboxylase; functional homolog of S. cerevisiae Erg19; possible drug target; regulated by carbon source, yeast-hypha switch, growth phase, antifungals; gene has intron; rat catheter, Spider biofilm repressed	615.315	273.983	Down
orf19.6190	SRB1	Essential GDP-mannose pyrophosphorylase; makes GDP-mannose for protein glycosylation; functional in S. cerevisiae psa1; on yeast-form, not hyphal cell surface; alkaline induced; induced on adherence to polystyrene; Spider biofilm repressed	1668.06	720.921	Down	Down	Y
orf19.3895	CHT2	GPI-linked chitinase; required for normal filamentous growth; repressed in core caspofungin response; fluconazole, Cyr1, Efg1, pH-regulated; mRNA binds She3 and is localized to yeast-form buds and hyphal tips; Spider biofilm repressed	337.934	139.541	Down	Down
orf19.5110	OPY2	Predicted transmembrane protein; role in cell wall biogenesis; required for Cek1 phosphorylation; Spider biofilm induced	44.2537	17.8725	Down	Down
orf19.7218	RBE1	Pry family cell wall protein; Rim101, Efg1, Ssn6, alkaline repressed; O-glycosylation; no GPI anchor predicted; ketoconazol induced; regulated by Sef1, Sfu1, Hap4; flow model biofilm induced; rat catheter and Spider biofilm repressed	128.413	50.4083	Down	Down
orf19.7218	RBE1	Pry family cell wall protein; Rim101, Efg1, Ssn6, alkaline repressed; O-glycosylation; no GPI anchor predicted; ketoconazol induced; regulated by Sef1, Sfu1, Hap4; flow model biofilm induced; rat catheter and Spider biofilm repressed	128.413	50.4083	Down	Down
orf19.7517	CHT1	Chitinase; putative N-terminal catalytic domain; has secretory signal sequence; lacks S/T region and N-glycosylation motifs of Chs2p and Chs3p; alkaline downregulated; expression not detected in yeast-form or hyphal cells	16.7504	6.55465	Down	Up
Protein biosynthesis & modification
orf19.1847	ARO10	Aromatic decarboxylase; Ehrlich fusel oil pathway of aromatic alcohol biosynthesis; alkaline repressed; protein abundance affected by URA3 expression in CAI-4 strain; Spider biofilm induced	11.2318	31.6666	Up	Down
orf19.5610	ARG3	Putative ornithine carbamoyltransferase; Gcn4-regulated; Hap43-induced; repressed in alkalinizing medium; rat catheter and Spider biofilm induced	64.9946	158.953	Up	Down
orf19.4664	NAT4	Putative histone acetyltransferase; involved in regulation of white-opaque switch; early-stage flow model biofilm induced; Spider biofilm induced	16.6948	40.4745	Up	Up
orf19.657	SAM2	S-adenosylmethionine synthetase; localizes to surface of hyphae, not yeast cells; alkaline, Hog1-induced; farnesol-downregulated; F-12/CO2 early biofilm induced; Spider biofilm repressed	30.3462	68.9972	Up	Up
orf19.2937	PMM1	Phosphomannomutase; enzyme of O- and N-linked mannosylation; interconverts mannose-6-phosphate and mannose-l-phosphate; functional homolog of S. cerevisiae Sec53; antigenic in mice; Hap43-induced; flow model and Spider biofilm repressed	177.787	359.477	Up	Down
orf19.385	GCV2	Glycine decarboxylase P subunit; protein of glycine catabolism; repressed by Efg1; Hog1-induced; induced by Rim101 at acid pH; transcript induced in elevated CO2; stationary phase enriched protein	239.429	118.193	Down	Up
orf19.5673	OPT7	Putative oligopeptide transporter; possibly transports GSH or related compounds; Hog1-induced; expression of OPT6, -7, or -8 does not suppress defect of mutant lacking OPT1-3; Hap43-repressed; F-12/CO2 early biofilm induced	33.2986	16.3345	Down	Up
orf19.7263	orf19.7263	Putative X-Pro aminopeptidase; Spider biofilm repressed	281.704	133.032	Down
orf19.4040	ILV3	Dihydroxyacid dehydratase; repressed by nitric oxide; macrophage-induced protein; protein in exponential and stationary growth phase; Sef1, Sfu1p, Hap43-regulated; farnesol-repressed; flow model biofilm induced; Spider biofilm repressed	274.293	129.023	Down	Down
orf19.6402	CYS3	Cystathionine gamma-lyase; induced by alkaline, amphotericin B, cadmium stress, oxidative stress via Cap1; possibly adherence-induced; Hog1 regulated; reduced levels in stationary phase yeast cells; Spider and flow model biofilm induced	723.158	321.203	Down	Up
orf19.6659	GAP6	Broad-specificity amino acid permease; Plc1, Gcn4 regulated; rat catheter biofilm induced	230.734	95.6629	Down	Down
orf19.2602	OPT1	Oligopeptide transporter; transports 3-to-5-residue peptides; alleles are distinct, one has intron; suppresses S. cerevisiae ptr2-2 mutant defects; induced by BSA or peptides; Stp3p, Hog1p regulated; flow model biofilm induced	27.5987	11.2522	Down	Down
orf19.3795	AGP3	Putative serine transporter; possible role in assimilation of sulfur; F-12/CO2 early biofilm induced	21.847	8.8404	Down	Down
orf19.6937	PTR22	Oligopeptide transporter involved in uptake of di-/tripeptides; regulated by Stp2 and Stp3; transcript induced upon phagocytosis by macrophage; repressed by Rim101 at pH 8; flow model biofilm induced	356.585	141.984	Down
orf19.3077	VID21	Subunit of the NuA4 histone acetyltransferase complex; soluble protein in hyphae; Spider biofilm repressed	43.5167	15.7575	Down	Up/Down
orf19.97	CAN1	Basic amino acid permease; complements lysine transport mutation; 10 predicted transmembrane regions, 3 predicted N-glycosylation sites; phagocytosis by macrophages induces transcript; rat catheter, Spider and flow model biofilm induced	35.0316	12.1046	Down	Up
orf19.6257	GLT1	Putative glutamate synthase; regulated by Sef1, Sfu1, and Hap43; rat catheter biofilm repressed	42.2148	10.0691	Down	Down
orf19.4679	AGP2	Amino acid permease; hyphal repressed; white-opaque switch regulated; induced in core caspofungin response, during cell wall regeneration, by flucytosine; regulated by Sef1, Sfu1, and Hap43; rat catheter and Spider biofilm induced	84.7969	18.1153	Down	Up
orf19.4026	HIS1	ATP phosphoribosyl transferase; enzyme of histidine biosynthesis; acid upregulated/alkaline repressed by Rim101; regulated by Gcn2, Gcn4; strain CA9 is a his1 mutant; flow model biofilm induced; Spider biofilm repressed	205.039	4.17384	Down	Down
Iron ion homeostasis
orf19.2006.1	COX17	Putative copper metallochaperone; Hap43p-repressed gene; rat catheter biofilm induced; Spider biofilm induced	57.8322	164.281	Up	Up
orf19.4009	CNB1	Regulatory subunit of calcineurin B (Ca[2+]-calmodulin-regulated S/T protein phosphatase); required for wild-type resistance to fluconazole or to SDS; micafungin is fungicidal to null mutant	118.889	240.956	Up	Up
orf19.4967	COX19	Putative cytochrome c oxidase assembly protein; Plc1-regulated; rat catheter biofilm induced	60.0501	120.389	Up	Up
orf19.700	SEO1	Protein with similarity to permeases; Sfu1-repressed; flucytosine induced; induced by Mnl1 under weak acid stress; flow model biofilm repressed	18.9623	9.28137	Down	Down
orf19.2343.1	orf19.2343.1	Putative vacuolar H+ ATPase subunit e of the V-ATPase V0 subcomplex; added to Assembly 21 based on comparative genome analysis	282.966	131.328	Down
orf19.1264	CFL2	Oxidoreductase; iron utilization; Sfu1/Sef1/Hap43/Nrg1/Tup1/Rim101 regulated; alkaline/low iron/fluphenazine/ciclopirox olamine, flucytosine, fluconazole, Spider/flow model/rat catheter biofilm induced; caspofungin/amphotericin B repressed	33.2867	12.4296	Down	Up
orf19.5643	ECM7	Protein involved in control of calcium homeostasis and oxidative stress response; mutants show defects in hyphal growth	31.9553	10.2703	Down	Down
Notes:
1. Gene names and function descriptions were copied from the CGD database (http://www.candidagenome.org/).
2. Average FPKM value is higher than or equal to 15 at least in one sample
3. Fold change (WT v.s. sfl2/sfl2) higher than or equal to 2.0
4. Up, Genes upregulated in 5% CO2; Down, Genes Downregulated in 5% CO2.
5. Grouping of the genes according to GO terminology determined by using the online CGD GO Term Finder tool (http://www.candidagenome.org/cgi-bin/GO/goTermFinder).
6. SFL2 expression data: Up, Genes upregulated when SFL2 is overexpressed[1]; Sfl2 ChIP: Y the gene is bound by Sfl2p[1]
[1] Znaidi S, Nesseir A, Chauvel M, Rossignol T, d’Enfert C. A comprehensive functional portrait of two heat shock factor-type transcriptional regulators involved in Candida albicans morphogenesis and virulence. 2013, 9(8): e1003519.

## Sheet: WT CO2 v.s.sfl2 CO2
Differentially expressed genes between the WT and sfl2/sfl2 strains in 5%CO2.
Gene ID	Gene name	Function description	Ave.of FPKM of WT in 5%CO2	Ave.of FPKM of sfl2/sfl2 in 5%CO2	Up-/Down-regulated in sfl2/sfl2	Sfl2 ChIP data
Carbohydrate metabolism
orf19.5113	ADH2	Alcohol dehydrogenase; soluble in hyphae; expression regulated by white-opaque switching; regulated by Ssn6; indued by Mnl1 in weak acid stress; protein enriched in stationary phase yeast cultures; Spider biofilm induced	10.4423	62.7463	Up
orf19.1105.2	PGA56	Regulator of sorbose utilization; putative GPI-anchor; hypha and cell wall regeneration induced; colony morphology-related gene regulation by Ssn6; induced by Tbf1, Hap43; Spider biofilm induced	6.26893	35.1109	Up
orf19.3668	HGT2	Putative MFS glucose transporter; 20 member C. albicans glucose transporter family; 12 probable membrane-spanning segments; expressed in rich medium with 2% glucose; rat catheter and Spider biofilm induced	4.50232	23.9022	Up
orf19.3672	GAL10	UDP-glucose 4-epimerase; galactose utilization; mutant has cell wall defects and increased filamentation; GlcNAc-, fluconazole- and ketoconazole-induced; stationary phase enriched protein; rat catheter and flow model biofilm induced	27.6535	100.34	Up	Y
orf19.4317	GRE3	Putative D-xylose reductase; antigenic in murine systemic infection; soluble protein in hyphae; induced by farnesol, macrophage interaction and by Mnl1 under weak acid stress; stationary-phase enriched protein; Spider biofilm induced	153.339	523.041	Up
orf19.3733	IDP2	Isocitrate dehydrogenase; white-opaque switch regulated; morphology-regulation by Ssn6; protein in exponential and stationary phase yeast; Hap43-repressed; Spider biofilm repressed by Bcr1, Tec1, Ndt80, Rob1, Brg1; Spider biofilm induced	40.1128	136.686	Up
orf19.7551	ALO1	D-Arabinono-1,4-lactone oxidase involved in biosynthesis of dehydro-D-arabinono-1,4-lactone, which has a protective role against oxidative damage; plasma membrane-localized;required for full virulence in a mouse model of systemic infection	20.3394	67.6455	Up
orf19.3670	GAL1	Galactokinase; galactose, Mig1, Tup1, Hap43 regulated; fluconazole, ketoconazole-induced; stationary phase enriched protein; GlcNAc-induced protein; farnesol, hypoxia-repressed in biofilm; rat catheter and Spider biofilm induced	61.8402	197.527	Up	Y
orf19.3675	GAL7	Putative galactose-1-phoshphate uridyl transferase; downregulated by hypoxia, upregulated by ketoconazole; macrophage/pseudohyphal-repressed	15.2569	48.7318	Up	Y
orf19.4527	HGT1	High-affinity MFS glucose transporter; induced by progesterone, chloramphenicol, benomyl; likely essential for growth; protein newly produced during adaptation to the serum; rat catheter and Spider biofilm induced	16.3839	50.6577	Up	Y
orf19.54	RHD1	Putative beta-mannosyltransferase required for the addition of beta-mannose to the acid-labile fraction of cell wall phosphopeptidomannan; 9-gene family memebr; regulated on yeast-hypha and white-opaque switches; Spider biofilm repressed	29.7492	89.8374	Up	Y
orf19.7514	PCK1	Phosphoenolpyruvate carboxykinase; glucose, C-source, yeast-hypha, Hap43 regulated; fluconazole, phagocytosis, H2O2, oral candidasis, Spider/rat catheter/flow model biofilm induced; repressed in biofilm by Bcr1, Tec1, Ndt80, Rob1, Brg1	75.455	227.539	Up
orf19.2172	ARA1	D-Arabinose dehydrogenase; dehydro-D-arabinono-1,4-lactone synthesis; active on D-arabinose, L-fucose, L-xylose, L-galactose; inhibited by metal ions, thiol group-specific reagents; induced on polystyrene adherence; Spider biofilm induced	92.2887	270.381	Up
orf19.3931	SFC1	Putative succinate-fumarate transporter; involved in repression of growth on sorbose; alkaline induced; rat catheter biofilm induced; Spider biofilm induced	10.5902	28.8277	Up
orf19.5622	GLC3	Putative 1,4-glucan branching enzyme; fluconazole-induced; colony morphology-related gene regulation by Ssn6; stationary phase enriched protein	49.3108	129.042	Up
orf19.5288	IFE2	Putative alcohol dehydrogenase; yeast-enriched transcript; Efg1-regulated; induced by prostaglandins, Hog1, fluconazole; rat catheter biofilm induced	112.698	286.84	Up
orf19.1078	HBR2	Putative alanine glyoxylate aminotransferase; regulated by Gcn4p and hemoglobin; stationary phase enriched protein	30.4063	77.3356	Up
orf19.1048	IFD6	Aldo-keto reductase; similar to aryl alcohol dehydrogenases; protein increase correlates with MDR1 overexpression (not CDR1 or CDR2) in fluconazole-resistant clinical isolates; farnesol regulated; possibly essential; Spider biofilm induced	16.1468	39.7388	Up
orf19.3526	ITR1	MFS inositol transporter; uptake of exogenous inositol; 12 transmembrane motifs; expressed in rich medium; fluconazole, caspofungin repressed; possibly essential (UAU1 method); flow model, rat catheter and Spider biofilm induced	15.1433	36.7102	Up
orf19.2841	PGM2	Ortholog of S. cerevisiae Pgm2; induced in planktonic culture; Tye7p-regulated; flow model biofilm induced; rat catheter biofilm repressed	61.4983	141.862	Up
orf19.999	GCA2	Predicted extracellular glucoamylase; induced by ketoconazole; possibly essential, disruptants not obtained by UAU1 method; promotes biofilm matrix formation; Spider biofilm induced; Bcr1-induced in RPMI a/a biofilms	14.3763	32.6534	Up
orf19.7021	GPH1	Putative glycogen phosphorylase; role in glycogen metabolism; regulated by Ssk1, Mig1, Tup1, Hap43; fluconazole-induced; localizes to cell surface of hyphae, not yeast; stationary phase enriched protein; Spider biofilm induced	259.42	587.507	Up
orf19.250	SLC1	Putative fatty acyltransferase; protein repressed during the mating process	34.3977	74.3756	Up
orf19.4754	ZWF1	Glucose-6-phosphate dehydrogenase; antigenic in mice; activity induced by O2 or oxidizing agents H2O2, menadione, macrophage; caspofungin repressed; induced in core stress response; regulated by Gcn2, Gcn4; rat catheter biofilm repressed	136.723	277.168	Up
orf19.6385	ACO1	Aconitase; induced in high iron; 2 upstream CCAAT motifs; amino acid starvation (3-AT), amphotericin B, phagocytosis, farnesol induced; Hap43, fluconazole-repressed; Gcn4-regulated; antigenic in infection; flow and Spider biofilm repressed	695.023	334.558	Down
orf19.6632	ACO2	Putative aconitate hydratase 2; induced in high iron; regulated by Gcn4; repressed by amino acid starvation (3-AT); protein levels decrease in stationary phase yeast; flow model and Spider biofilm repressed	139.482	65.6715	Down
orf19.691	GPD2	Surface protein similar to glycerol 3-P dehydrogenase; binds host Factor H, FHL-1, plasminogen; regulated by Ssn6, Nrg1, Efg1; induced by cell wall regeneration, macrophage/pseudohyphal growth, core stress response; Spider biofilm induced	576.839	266.814	Down
orf19.2021	HGT8	High-affinity glucose transporter of the major facilitator superfamily; 20 members in the C. albicans glucose transporter family; 12 probable membrane-spanning segments; gene has intron; expressed in rich medium; flow model biofilm induced	89.4944	38.6168	Down
orf19.385	GCV2	Glycine decarboxylase P subunit; protein of glycine catabolism; repressed by Efg1; Hog1-induced; induced by Rim101 at acid pH; transcript induced in elevated CO2; stationary phase enriched protein	260.263	111.925	Down
orf19.2158	NAG3	Putative MFS transporter; similar to Nag4; required for wild-type mouse virulence and cycloheximide resistance; in gene cluster that includes genes encoding enzymes of GlcNAc catabolism; Spider biofilm repressed	27.2136	10.6453	Down
orf19.3893	SCW11	Cell wall protein; repressed in ace2 mutant; repressed in core caspofungin response; induced in high iron; possibly an essential gene, disruptants not obtained by UAU1 method; rat catheter and Spider biofilm repressed	77.8208	28.2459	Down
orf19.5437	RHR2	Glycerol 3-phosphatase; roles in osmotic tolerance, glycerol accumulation in response to salt; Spider/flow model biofilm induced; regulated by macrophage, stress, yeast-hyphal switch, pheromone, Gcn4, Hog1, Nrg1, Tup1	1500.81	512.229	Down
orf19.7517	CHT1	Chitinase; putative N-terminal catalytic domain; has secretory signal sequence; lacks S/T region and N-glycosylation motifs of Chs2p and Chs3p; alkaline downregulated; expression not detected in yeast-form or hyphal cells	17.1772	5.80756	Down
Fatty acid metabolic process
orf19.1089	PEX11	Putative peroxisomal membrane protein; role in fatty acid oxidation; expression is Tac1-regulated; Hms1p-dependent induction by geldamycin; Spider biofilm induced	10.6241	60.5804	Up
orf19.7043.1	ACB1	Protein similar to a region of acyl-coenzyme-A-binding protein; amphotericin B repressed; regulated by Nrg1, Tup1; Hap43-induced	408.025	1457.15	Up
orf19.638	FDH1	Formate dehydrogenase; oxidizes formate to CO2; Mig1 regulated; induced by macrophages; fluconazole-repressed; repressed by Efg1 in yeast, not hyphal conditions; stationary phase enriched; rat catheter and Spider biofilm induced	93.9815	212.08	Up
orf19.4933	FAD3	Omega-3 fatty acid desaturase; production of alpha-linolenic acid, a major component of membranes; caspofungin induced; Plc1-regulated; colony morphology-related gene regulation by Ssn6; Spider biofilm induced, flow model biofilm repressed	55.0576	20.207	Down
Cell adhesion & filamentation
orf19.6489	FMP45	Predicted membrane protein induced during mating; mutation confers hypersensitivity to toxic ergosterol analog, to amphotericin B; alkaline repressed; repressed by alpha pheromone in SpiderM medium; rat catheter, Spider biofilm induced	7.73814	28.7066	Up
orf19.2531	CSP37	Hyphal cell wall protein; role in progression of mouse systemic infection; predicted P-loop, divalent cation binding, N-glycosylation sites; expressed in yeast and hyphae; hyphal downregulated; stationary-phase enriched; GlcNAc-induced	349.913	1066.06	Up
orf19.220	PIR1	1,3-beta-glucan-linked cell wall protein; N-mannosylated, O-glycosylated by Pmt1; cell wall defect in het mutant; Hog1/fluconazole/hypoxia induced; iron/Efg1/Plc1/temp regulated; flow model biofilm induced; hyphal, Spider biofilm repressed	48.9516	138.452	Up	Y
orf19.7446	OPI3	Phosphatidylethanolamine N-methyltransferase; phosphatidylcholine biosynthesis; downregulation correlates with clinical development of fluconazole resistance; amphotericin B, caspofungin repressed; Hap43-induced; Spider biofilm repressed	33.8958	94.0145	Up
orf19.2768	AMS1	Putative alpha-mannosidase; transcript regulated by Nrg1; induced during cell wall regeneration; flow model biofilm induced; Spider biofilm induced	62.1036	164.302	Up
orf19.1232	VRG4	GDP-mannose transporter; essential; required for glycosylation, hyphal growth; functional homolog of S. cerevisiae Vrg4p, which imports GDP-mannose from cytoplasm to Golgi for protein and lipid mannosylation; no mammalian homolog	20.5251	52.6065	Up
orf19.4475	KTR4	Mannosyltransferase; induced during cell wall regeneration; fungal-specific (no human or murine homolog); Bcr1-repressed in RPMI a/a biofilms	18.4075	43.5068	Up
orf19.2937	PMM1	Phosphomannomutase; enzyme of O- and N-linked mannosylation; interconverts mannose-6-phosphate and mannose-l-phosphate; functional homolog of S. cerevisiae Sec53; antigenic in mice; Hap43-induced; flow model and Spider biofilm repressed	160.754	379.905	Up
orf19.3674	GAL102	UDP-glucose 4,6-dehydratase; role in mannosylation of cell wall proteins; mutation confers hypersensitivity to toxic ergosterol analog; overlaps orf19.3673; Spider biofilm induced	13.3748	30.2608	Up	Y
orf19.2927	MNN11	Protein of unknown function	7.22964	15.4838	Up
orf19.4943	PSA2	Mannose-1-phosphate guanyltransferase; Hap43, macrophage-repressed; stationary phase enriched protein; Spider biofilm induced; rat catheter biofilm repressed	143.295	301.959	Up
orf19.4257	INT1	Protein structurally similar to alpha-subunit of human leukocyte integrin; role in morphogenesis, adhesion, and mouse cecal colonization and systemic virulence; similar to S. cerevisiae Bud4; Hap43-induced gene	30.0007	14.9976	Down
orf19.6190	SRB1	Essential GDP-mannose pyrophosphorylase; makes GDP-mannose for protein glycosylation; functional in S. cerevisiae psa1; on yeast-form, not hyphal cell surface; alkaline induced; induced on adherence to polystyrene; Spider biofilm repressed	1545.76	591.736	Down
orf19.6105	MVD	Mevalonate diphosphate decarboxylase; functional homolog of S. cerevisiae Erg19; possible drug target; regulated by carbon source, yeast-hypha switch, growth phase, antifungals; gene has intron; rat catheter, Spider biofilm repressed	656.452	237.512	Down
orf19.5736	ALS5	ALS family adhesin; highly variable; expression in S. cerevisiae causes adhesion to human epithelium, endothelium or ECM, endothelial invasiveness by endocytosis and, at high abundance, ECM-induced aggregation; can form amyloid fibrils	17.8945	6.3212	Down
orf19.7218	RBE1	Pry family cell wall protein; Rim101, Efg1, Ssn6, alkaline repressed; O-glycosylation; no GPI anchor predicted; ketoconazol induced; regulated by Sef1, Sfu1, Hap4; flow model biofilm induced; rat catheter and Spider biofilm repressed	109.743	34.3503	Down
orf19.2767	PGA59	Adhesin-like cell wall protein; putative GPI-anchor; colony morphology-related gene regulation by Ssn6; Hap43-induced; Spider biofilm repressed	18836.4	5765.72	Down
Response to stress & drug
orf19.4526	HSP30	Putative heat shock protein; fluconazole repressed; amphotericin B induced; Spider biofilm induced; rat catheter biofilm induced	4.93909	59.1164	Up
orf19.113	CIP1	Possible oxidoreductase; transcript induced by cadmium but not other heavy metals, heat shock, yeast-hypha switch, oxidative stress (via Cap1), or macrophage interaction; stationary phase enriched protein; Spider biofilm induced	18.3523	80.4372	Up
orf19.822	HSP21	Small heat shock protein; role in stress response and virulence; fluconazole-downregulated; induced in cyr1 or ras1 mutant; stationary phase enriched protein; detected in some, not all, biofilm extracts; Spider biofilm induced	2383.17	8995.87	Up
orf19.7611	TRX1	Thioredoxin; involved in response to reactive oxygen species; biofilm, benomyl, flucytosine, peroxide, Hap43 induced; amphotericin B, caspofungin repressed; induced by human neutrophils; macrophage-repressed gene	383.692	1392.17	Up
orf19.3150	GRE2	Putative reductase; Nrg1 and Tup1-regulated; benomyl- and hyphal-induced; macrophage/pseudohyphal-repressed; repressed by low iron; possibly involved in osmotic stress response; stationary phase enriched protein; Spider biofilm induced	29.2123	91.1564	Up
orf19.4688	DAG7	Secretory protein; a-specific, alpha-factor induced; mutation confers hypersensitivity to toxic ergosterol analog; fluconazole-induced; induced during chlamydospore formation in C. albicans and C. dubliniensis	65.478	174.782	Up	Y
orf19.251	GLX3	Glutathione-independent glyoxalase; binds human immunoglobulin E; alkaline, fluconazole, Hog1 repressed; hypoxia, oxidative stress via Cap1, Hap43 induced; stationary-phase enriched; rat catheter, Spider biofilm induced	858.88	2218.47	Up
orf19.243	OXR1	Protein of unknown function	29.5786	74.7378	Up
orf19.633	CRG1	Methyltransferase involved in sphingolipid homeostasis, methylates a drug cantharidin; decreased expression in hyphae compared to yeast; expression regulated during planktonic growth; flow model biofilm induced; Hap43-repressed gene	20.9511	51.7411	Up
orf19.2849	AQY1	Aquaporin water channel; osmotic shock resistance, WT freeze tolerance; virulent in mice; flucytosine repressed; flow model/RPMI/Spider/rat catheter biofilm induced; required for RPMI biofilm formation; Bcr1-induced in a/a RPMI biofilms	91.3531	220.706	Up
orf19.4436	GPX3	Putative glutathione peroxidase involved in Cap1p-dependent oxidative stress response, required for Cap1p oxidation in response to H2O2; planktonic growth-induced	14.8939	33.7645	Up
orf19.895	HOG1	MAP kinase of osmotic-, heavy metal-, and core stress response; role in regulation of glycerol, D-arabitol in response to stress; phosphorylated in response to H2O2 (Ssk1-dependent) or NaCl; mutant induces protective mouse immune response	34.9144	76.5295	Up
orf19.4491	ERG20	Putative farnesyl pyrophosphate synthetase involved in isoprenoid and sterol biosynthesis, based on similarity to S. cerevisiae Erg20p; likely to be essential for growth, based on an insertional mutagenesis strategy	237.86	514.403	Up
orf19.767	ERG3	C-5 sterol desaturase; introduces C-5(6) double bond into episterol; some clinical isolates show increased azole resistance and defects in hyphal growth and virulence; Efg1p-repressed; fluconazole-induced	101.289	218.394	Up
orf19.847	YIM1	Protein similar to protease of mitochondrial inner membrane; increased transcription is observed upon benomyl treatment; macrophage-downregulated gene	52.4293	108.403	Up
orf19.6091	RIM8	Beta-arrestin-like protein; involved in pH response; required for pathogenesis, activation of Rim101 and alkaline pH-induced hyphal growth; colony morphology-related gene regulation by Ssn6p negative feedback regulation target	59.8477	29.4917	Down
orf19.1065	SSA2	HSP70 family chaperone; cell wall fractions; antigenic; beta-defensin peptides impport; ATPase domain binds histatin 5; at hyphal surface, not yeast; farnesol-repressed in biofilm; flow model, Spider biofilm repressed; caspofungin repressed	958.294	453.68	Down
orf19.6367	SSB1	HSP70 family heat shock protein; mRNA in yeast and germ tubes; at yeast cell surface, not hyphae; antigenic in human/mouse infection; macrophage, GCN-induced; possibly essential; sumoylation target; Hap43-induced; Spider biofilm repressed	2501.94	1160.35	Down
orf19.668	TOS4	Putative fork-head transcription factor; rat catheter and Spider biofilm repressed	43.5703	17.6757	Down
orf19.655	PHO84	High-affinity phosphate transporter; transcript regulated by white-opaque switch; Hog1, ciclopirox olamine or alkaline induced; caspofungin, stress repressed; upregulated in RHE model; Spider and flow model biofilm induced, Hap43-induced	198.527	76.6585	Down
orf19.3740	PGA23	Putative GPI-anchored protein of unknown function; Rim101-repressed; Cyr1-regulated; colony morphology-related gene regulation by Ssn6	15.0721	4.03007	Down
Transcription factor
orf19.517	HAP31	Putative CCAAT-binding transcription factor; regulates CYC1; required for resistance to rapamycin, copper; induced in high iron; repressed in low iron; Sef1, Sfu1, and Hap43 regulated; rat catheter and Spider biofilm induced	60.0139	169.149	Up
orf19.740	HAP41	Putative Hap4-like transcription factor; Hap43-repressed; not required for response to low iron; induced by Mnl1 under weak acid stress; Spider biofilm induced	63.3112	147.029	Up	Y
orf19.6798	SSN6	Functional homolog of S. cerevisiae Cyc8/Ssn6; hyphal growth regulator; repressed during hyphal growth; Ssn6 and Tup1 regulate distinct sets of genes; overexpression or mutation causes avirulence in mouse IV infection; TPR motifs	148.431	72.6717	Down	Y
orf19.5908	TEC1	TEA/ATTS transcription factor; white cell pheromone response, hyphal gene regulation; required for Spider and RPMI biofilm formation; regulates BCR1; Cph2 regulated transcript; alkaline, rat catheter, Spider, flow model biofilm induced	24.527	11.9246	Down	Y
orf19.6102	RCA1	Protein involved in regulation of carbonic anhydrases; controls CO2 sensing; bZIP domain-containing transcription factor of the ATF/CREB family; null mutant displays slow growth, abnormal colony morphology and invasive growth	154.901	71.9596	Down
orf19.467	WOR3	Transcription factor; modulator of white-opaque switch; induced in opaque cells; promoter bound by Wor1; overexpression at 25 degr shifts cells to opaque state; deletion stabilizes opaque cells at higher temperatures; Spider biofilm induced	21.3045	9.86683	Down
orf19.422	SPT20	Putative transcription factor; downregulated upon adherence to polystyrene; flucytosine repressed	28.2529	12.9899	Down
orf19.1253	PHO4	bHLH transcription factor of the myc-family; required for growth in medium lacking phosphate and for resistance to copper and Phloxine B; induced by Mnl1 under weak acid stress	55.9286	25.447	Down
orf19.1973	HAP5	Component of CCAAT-binding transcription factor; roles in filamentous growth, low-iron induction of FRP1; regulates genes involved in respiratory growth; functional homolog of S. cerevisiae Hap5p; Cap1p-dependent expression in low iron	65.305	29.2168	Down
orf19.4225	LEU3	Zn(II)2Cys6 transcription factor; predicted regulator branched-c ofhain amino acid biosynthesis genes; alkaline induced; induced by Mnl1 under weak acid stress; required for yeast cell adherence to silicone substrate; Spider biofilm induced	49.0558	21.4444	Down
orf19.6734	TCC1	Putative transcription factor/corepressor; regulation of filamentation and virulence; interacts with Tup1; regulates hypha-specific gene expression; contains 4 tetratricopeptide repeat (TPR) motifs; flucytosine repressed; Tbp1-induced	59.2294	25.6678	Down	Y
orf19.4662	RLM1	Putative transcription factor; required for wild-type resistance to cell wall perturbation, caspofungin treatment; regulates caspofungin induction of PGA13	30.9465	13.0892	Down
orf19.6182	ZCF34	Zn(II)2Cys6 transcription factor involved in regulation of multidrug resistance via control of CDR1 expression; mutants display decreased colonization of mouse kidneys; required for yeast cell adherence to silicone substrate	41.6427	16.588	Down
orf19.7136	SPT6	Putative transcription elongation factor; transposon mutation affects filamentous growth; transcript induced in an RHE model of oral candidiasis and in clinical isolates from oral candidiasis	173.011	67.1037	Down
orf19.6109	TUP1	Transcriptional corepressor; represses filamentous growth; regulates switching; role in germ tube induction, farnesol response; in repression pathways with Nrg1, Rfg1; farnesol upregulated in biofilm; rat catheter, Spider biofilm repressed	775.148	292.933	Down
orf19.1032	SKO1	bZIP transcription factor; involved in cell wall damage response; represses the yeast-to-hypha transition; mutants are caspofungin sensitive; induced by osmotic stress via Hog1; induced by Mnl1 under weak acid stress	57.9757	21.5786	Down
orf19.5558	RBF1	Transcription factor; glutamine-rich activation domain; binds RPG-box DNA sequences; predominantly nuclear; mutation causes accelerated induction of filamentous growth; antigenic during human oral infection; Sko1p-repressed	41.4817	15.2746	Down
orf19.2119	NDT80	Ortholog of Ndt80; meiosis-specific transcription factor; activator of CDR1 induction by antifungal drugs; required for wild-type drug resistance and for Spider biofilm formation; transcript induced by antifungal drug treatment	190.755	54.5913	Down
orf19.4056	BRG1	Transcription factor; recruits Hda1 to hypha-specific promoters; Tn mutation affects filamentation; Hap43-repressed; Spider and flow model biofilm induced; required for Spider biofilm formation; Bcr1-repressed in RPMI a/a biofilms	52.8694	12.703	Down	Y
Cell wall biosynthesis
orf19.6313.2	MVB12	ESCRT-I complex subunit with a role in multivesicular body (MVB) trafficking; mutant displays growth defect on alkaline medium; Hap43p-repressed gene	29.5677	80.765	Up
orf19.3696	TOM22	Putative mitochondrial import receptor subunit; colony morphology-related gene regulation by Ssn6	117.046	299.171	Up
orf19.6296	VPS22	ESCRT-II complex protein with a role in multivesicular body (MVB) trafficking; required for processing of Rim8p; Hap43p-repressed gene	10.4848	26.3386	Up
orf19.6420	PGA13	GPI-anchored cell wall protein involved in cell wall synthesis; required for normal cell surface properties; induced in oralpharyngeal candidasis; Spider biofilm induced; Bcr1-repressed in RPMI a/a biofilms	90.4099	211.105	Up
orf19.147	YAK1	Predicted serine-threonine protein kinase; involved in hyphal growth regulation and biofilm formation; flow model biofilm induced; induced in core caspofungin response	12.8435	29.5311	Up
orf19.145	RPB4	Protein similar to S. cerevisiae Rpb4p, which is a component of RNA polymerase II; transposon mutation affects filamentous growth	47.8916	105.635	Up
orf19.3895	CHT2	GPI-linked chitinase; required for normal filamentous growth; repressed in core caspofungin response; fluconazole, Cyr1, Efg1, pH-regulated; mRNA binds She3 and is localized to yeast-form buds and hyphal tips; Spider biofilm repressed	185.184	91.5062	Down	Y
orf19.4910	FGR41	Putative GPI-anchored adhesin-like protein; transposon mutation affects filamentous growth; Spider biofilm repressed	152.23	73.0792	Down
orf19.4815	YTM1	Protein similar to S. cerevisiae Ytm1p, which is involved in biogenesis of the large ribosomal subunit; transposon mutation affects filamentous growth; protein level decreases in stationary phase cultures; Hap43p-induced gene	101.605	43.614	Down
orf19.6099	CCT8	Chaperonin-containing T-complex subunit; role in hyphal morphogenesis, particularly starvation-induced; essential; expression in S. cerevisiae inhibits Ras2-mediated pathways; CCT8 and TRP1 overlap; Spider biofilm repressed	391.706	165.717	Down
orf19.1490	MSB2	Mucin family adhesin-like protein; cell wall damage sensor; required for Cek1 phosphorylation by cell wall stress; Rim101-repressed; activation releases extracellular domain into medium; Spider biofilm induced	57.5064	24.0944	Down	Y
orf19.3884	FGR50	Protein lacking an ortholog in S. cerevisiae; transposon mutation affects filamentous growth; Spider biofilm repressed	58.8607	23.2405	Down
Protein biosynthesis & modification
orf19.5610	ARG3	Putative ornithine carbamoyltransferase; Gcn4-regulated; Hap43-induced; repressed in alkalinizing medium; rat catheter and Spider biofilm induced	37.8083	150.632	Up
orf19.4274	PUT1	Putative proline oxidase; alkaline upregulated by Rim101; flow model biofilm induced; Spider biofilm induced	7.48301	25.2854	Up
orf19.3770	ARG8	Putative acetylornithine aminotransferase; Gcn2, Gcn4 regulated; rat catheter biofilm induced; Spider biofilm induced	17.2693	45.9953	Up
orf19.5065	ERD1	Putative membrane protein required for the retention of lumenal endoplasmic reticulum proteins; rat catheter biofilm induced	14.4534	37.7743	Up
orf19.4630	CPA1	Putative carbamoyl-phosphate synthase subunit; alkaline repressed; rat catheter, Spider and flow model biofilm induced	32.3425	73.1132	Up
orf19.2009	PEX12	Protein of unknown function	23.8852	51.5007	Up
orf19.7469	ARG1	Argininosuccinate synthase; arginine synthesis; Gcn4, Rim101 regulated; induced by amino acid starvation (3-AT), benomyl treatment; stationary phase enriched protein; repressed in alkalinizing medium; rat catheter, Spider biofilm induced	178.865	379.433	Up
orf19.944	IFG3	Putative D-amino acid oxidase; Spider biofilm induced	16.1233	33.7351	Up
orf19.793	CAK1	Monomeric CDK-activating kinase; functional homolog of S. cerevisiae Cak1p; phosphorylates cyclin-free human CDK2; lacks glycine loop motif; conserved lysine (K36) not required for activity; possibly essential gene (by UAU1 method)	29.841	61.154	Up
orf19.3099	TRP4	Predicted enzyme of amino acid biosynthesis; upregulated in biofilm; regulated by Gcn2p and Gcn4p; S. cerevisiae ortholog is Gcn4p regulated	104.642	52.3198	Down
orf19.7261	GDI1	Putative Rab GDP-dissociation inhibitor; GlcNAc-induced protein; Spider biofilm repressed	542	262.721	Down
orf19.3288	NMA111	Putative serine protease and general molecular chaperone; macrophage-induced gene; repressed in core stress response; merged with orf19.3288.1 in Assembly 21	54.9252	25.2507	Down
orf19.6937	PTR22	Oligopeptide transporter involved in uptake of di-/tripeptides; regulated by Stp2 and Stp3; transcript induced upon phagocytosis by macrophage; repressed by Rim101 at pH 8; flow model biofilm induced	243.931	111.118	Down
orf19.4060	ARO4	3-deoxy-D-arabinoheptulosonate-7-phosphate synthase; aromatic amino acid biosynthesis; GCN-regulated; feedback-inhibited by tyrosine if produced in S. cerevisiae Aro3p and Aro4p catalyze same reaction; protein decreases in stationary phase	548.84	249.799	Down
orf19.2098	ARO8	Aromatic transaminase of the Ehrlich fusel oil pathway of aromatic alcohol biosynthesis; Rim101 independent alkaline induction; protein abundance affected by URA3 expression in CAI-4 strain; Gcn4-regulated; stationary phase enriched	438.158	198.61	Down
orf19.4192	CDC14	Protein involved in exit from mitosis and morphogenesis; ortholog of S. cerevisiae Cdc14p, which is a dual-specificity phosphatase and cell-cycle regulator; suppresses S. cerevisiae cdc15-lyt1, dbf2-2, and (partially) tem1 mutant phenotypes	29.4711	13.113	Down
orf19.5673	OPT7	Putative oligopeptide transporter; possibly transports GSH or related compounds; Hog1-induced; expression of OPT6, -7, or -8 does not suppress defect of mutant lacking OPT1-3; Hap43-repressed; F-12/CO2 early biofilm induced	31.7606	13.9382	Down
orf19.386	SAM4	Putative S-adenosylmethionine-homocysteine methyltransferase; Hap43-repressed; alkaline induced; Spider biofilm repressed	282.952	123.935	Down
orf19.5639	HIS4	Multifunctional enzyme that catalyzes three steps of histidine biosynthesis, with phosphoribosyl-AMP cyclohydrolase, phosphoribosyl-ATP diphosphatase, and histidinol dehydrogenase activities; required for wild-type adhesion to human calls	261.665	106	Down
orf19.6086	LEU4	Putative 2-isopropylmalate synthase; regulated by Nrg1, Mig1, Tup1, Gcn4; induced by human whole blood or PMNs; macrophage/pseudohyphal-repressed after 16h; Spider biofilm repressed	66.5318	26.7163	Down
orf19.2602	OPT1	Oligopeptide transporter; transports 3-to-5-residue peptides; alleles are distinct, one has intron; suppresses S. cerevisiae ptr2-2 mutant defects; induced by BSA or peptides; Stp3p, Hog1p regulated; flow model biofilm induced	22.7461	8.83142	Down
orf19.6402	CYS3	Cystathionine gamma-lyase; induced by alkaline, amphotericin B, cadmium stress, oxidative stress via Cap1; possibly adherence-induced; Hog1 regulated; reduced levels in stationary phase yeast cells; Spider and flow model biofilm induced	820.637	275.39	Down
orf19.4040	ILV3	Dihydroxyacid dehydratase; repressed by nitric oxide; macrophage-induced protein; protein in exponential and stationary growth phase; Sef1, Sfu1p, Hap43-regulated; farnesol-repressed; flow model biofilm induced; Spider biofilm repressed	405.305	123.45	Down
orf19.3077	VID21	Subunit of the NuA4 histone acetyltransferase complex; soluble protein in hyphae; Spider biofilm repressed	49.9829	15.0839	Down
orf19.5811	MET1	Putative uroporphyrin-3 C-methyltransferase, methionine biosynthesis enzyme; upregulated by human whole blood or polymorphonuclear (PMN) cells; Hog1p-induced; fungal-specific (no human or murine homolog); Hap43p-repressed	114.734	30.9753	Down
orf19.4679	AGP2	Amino acid permease; hyphal repressed; white-opaque switch regulated; induced in core caspofungin response, during cell wall regeneration, by flucytosine; regulated by Sef1, Sfu1, and Hap43; rat catheter and Spider biofilm induced	40.8376	8.21292	Down
orf19.6257	GLT1	Putative glutamate synthase; regulated by Sef1, Sfu1, and Hap43; rat catheter biofilm repressed	58.5133	7.83879	Down
orf19.4026	HIS1	ATP phosphoribosyl transferase; enzyme of histidine biosynthesis; acid upregulated/alkaline repressed by Rim101; regulated by Gcn2, Gcn4; strain CA9 is a his1 mutant; flow model biofilm induced; Spider biofilm repressed	250.487	3.44803	Down
Iron ion homeostasis
orf19.4526	HSP30	Putative heat shock protein; fluconazole repressed; amphotericin B induced; Spider biofilm induced; rat catheter biofilm induced	4.93909	59.1164	Up
orf19.1976	TRX2	Similar to thioredoxins; not expected to be enzymatically active because it lacks a canonical thioredoxin active site (Trp-Cys-Gly-Pro-Cys); TRX1 encodes all of the cytoplasmic/nuclear thioredoxin function in C. albicans; Hap43p-induced	10.3679	33.0459	Up
orf19.2006.1	COX17	Putative copper metallochaperone; Hap43p-repressed gene; rat catheter biofilm induced; Spider biofilm induced	70.1755	182.357	Up
orf19.2369.1	ATX1	Putative cytosolic copper metallochaperone; flucytosine induced; Ssr1-repressed; rat catheter biofilm induced	112.581	266.697	Up
orf19.2825	DRE2	Putative cytosolic Fe-S protein assembly protein; a-specific transcript; regulated by Sef1, Sfu1, and Hap43; rat catheter and Spider biofilm induced	22.5296	49.9676	Up
orf19.4802	FTH1	Protein similar to S. cerevisiae Fth1p, a high affinity iron transporter for intravacuolar stores of iron; repressed by Sfu1p, amphotericin B, caspofungin; induced by alkaline pH, ciclopirox olamine; regulated by Sef1p, Sfu1p, and Hap43p	35.7713	75.7502	Up
orf19.2166	VMA5	Putative vacuolar H(+)-ATPase; plasma membrane localized; rat catheter biofilm repressed	34.8072	72.8808	Up
orf19.4009	CNB1	Regulatory subunit of calcineurin B (Ca[2+]-calmodulin-regulated S/T protein phosphatase); required for wild-type resistance to fluconazole or to SDS; micafungin is fungicidal to null mutant	124.386	250.068	Up
orf19.5643	ECM7	Protein involved in control of calcium homeostasis and oxidative stress response; mutants show defects in hyphal growth	25.0577	11.23	Down
orf19.105	HAL22	Putative phosphoadenosine-5'-phosphate or 3'-phosphoadenosine 5'-phosphosulfate phosphatase; possible role in sulfur recycling; Hap43-repressed; F-12/CO2 biofilm induced	24.9643	10.8512	Down
orf19.1715	IRO1	Putative transcription factor; role in iron utilization, pathogenesis; both IRO1 and adjacent URA3 are mutated in strain CAI4; suppresses S. cerevisiae aft1 mutant low-iron growth defect; hyphal-induced; reports differ about iron regulation	52.0716	22.4511	Down
orf19.367	CNH1	Na+/H+ antiporter; required for wild-type growth, cell morphology, and virulence in a mouse model of systemic infection; not transcriptionally regulated by NaCl; fungal-specific (no human or murine homolog)	129.382	54.1337	Down
orf19.700	SEO1	Protein with similarity to permeases; Sfu1-repressed; flucytosine induced; induced by Mnl1 under weak acid stress; flow model biofilm repressed	20.0225	8.35042	Down
Notes:
1. Gene names and function descriptions were copied from the CGD database (http://www.candidagenome.org/).
2. Average FPKM value is higher than or equal to 15 at least in one sample
3. Fold change (WT v.s. sfl2/sfl2) higher than or equal to 2.0
4. Up, Genes upregulated in 5% CO2; Down, Genes downregulated in 5% CO2.
5. Grouping of the genes according to GO terminology determined by using the online CGD GO Term Finder tool (http://www.candidagenome.org/cgi-bin/GO/goTermFinder).
6. Sfl2 ChIP: Y the gene is bound by Sfl2p[1]
[1] Znaidi S, Nesseir A, Chauvel M, Rossignol T, d’Enfert C. A comprehensive functional portrait of two heat shock factor-type transcriptional regulators involved in Candida albicans morphogenesis and virulence. 2013, 9(8): e1003519.

## Sheet: Raw data
Gene ID	Gene name	Function description	FPKM of WT in air-1	FPKM of WT in air-2	FPKM of WT in CO2-1	FPKM of WT in CO2-2	FPKM of sfl2/sfl2 in air-1	FPKM of sfl2/sfl2 in air-2	FPKM of sfl2/sfl2 in CO2-1	FPKM of sfl2/sfl2 in CO2-2
caalfmp01	COX2	Subunit II of cytochrome c oxidase, which is the terminal member of the mitochondrial inner membrane electron transport chain; one of three mitochondrially-encoded subunits	1.16979	2.26112e-05	0.931203	9.9499e-10	4.38872e-05	3.06727e-16	2.30589e-15	0.487069
caalfmp02	NAD6	Subunit 6 of NADH:ubiquinone oxidoreductase (NADH:ubiquinone dehydrogenase), a multisubunit enzyme complex (complex I) of the mitochondrial inner membrane that catalyzes the first step in mitochondrial respiration	1.13919	3.02428e-20	9.72227e-10	0.399706	1.96711e-07	1.94181	1.5644	1.83057
caalfmp03	NAD1	Subunit 6 of NADH:ubiquinone oxidoreductase (NADH:ubiquinone dehydrogenase), a multisubunit enzyme complex (complex I) of the mitochondrial inner membrane that catalyzes the first step in mitochondrial respiration	2.30792	2.2191	1.84037	0.944136	2.01493	1.55993	1.85433	1.24779
caalfmp04	COX3A	Subunit III of cytochrome c oxidase, which is the terminal member of the mitochondrial inner membrane electron transport chain; identical to Cox3Bp; one of three mitochondrially-encoded subunits	0	0	0	0	0	0	0	0
caalfmp05	ATP9	Subunit 9 of the F0 sector of mitochondrial F1F0 ATP synthase, which is a large, evolutionarily conserved enzyme complex required for ATP synthesis	17.2059	42.0773	14.4692	26.3747	1.88927	0	1.31035	6.3886
caalfmp06	ATP6	Subunit 6 of the F0 sector of mitochondrial F1F0 ATP synthase, which is a large, evolutionarily conserved enzyme complex required for ATP synthesis	18.4132	36.0875	18.0487	18.5429	6.93262	9.64708	7.80638	29.9699
caalfmp07	ATP8	Subunit 8 of the F0 sector of mitochondrial F1F0 ATP synthase, which is a large, evolutionarily conserved enzyme complex required for ATP synthesis	40.4544	112.782	78.2455	104.357	22.5063	47.5372	26.3415	199.777
caalfmp08	COX1	Subunit I of cytochrome c oxidase, which is the terminal member of the mitochondrial (mt) inner membrane electron transport chain; one of three mt-encoded subunits; alternatively spliced transcripts encode 4 putative splicing endonucleases	6.27481	7.72814	4.40545	6.92426	3.58344	4.6325	3.03485	13.9258
CaalfMp08.1	CaalfMp08.1	Putative endonuclease encoded by the first exon and part of the first intron of the mitochondrial COX1 gene; C-terminus contains a LAGLIDADG domain found in intron-encoded endonucleases; conserved in fungal mitochondria	0.149092	0.149523	0.12294	0.0629109	0.212814	0.272511	8.11541e-20	1.00476
CaalfMp08.2	CaalfMp08.2	Putative endonuclease encoded by the first two exons and part of the second intron of the mitochondrial COX1 gene; C-terminus contains a LAGLIDADG domain found in intron-encoded endonucleases; conserved in fungal mitochondria	0.103337	0.528486	0.337467	0.0802251	0.241979	0.410706	0.235692	1.09511
CaalfMp08.3	CaalfMp08.3	Putative endonuclease encoded by the first three exons and part of the third intron of the mitochondrial COX1 gene; C-terminus contains a LAGLIDADG domain found in intron-encoded endonucleases; conserved in fungal mitochondria	0.437918	0.209198	0.189744	0.246388	0.322652	0.464784	0.533938	1.16308
CaalfMp08.4	CaalfMp08.4	Putative endonuclease encoded by the first four exons and part of the fourth intron of the mitochondrial COX1 gene; C-terminus contains a LAGLIDADG domain found in intron-encoded endonucleases; conserved in fungal mitochondria	1.59784e-11	8.62041e-07	1.69146e-05	4.97481e-07	1.0372e-08	1.12202e-11	1.94628e-06	1.16733e-06
caalfmp09	NAD2	Subunit 2 of NADH:ubiquinone oxidoreductase (NADH:ubiquinone dehydrogenase), a multisubunit enzyme complex (complex I) of the mitochondrial inner membrane that catalyzes the first step in mitochondrial respiration	0.995275	0.483609	0.984668	0.682051	0.162856	0.506917	0.211786	1.23907
caalfmp10	NAD3	Subunit 3 of NADH:ubiquinone oxidoreductase (NADH:ubiquinone dehydrogenase), a multisubunit enzyme complex (complex I) of the mitochondrial inner membrane that catalyzes the first step in mitochondrial respiration	0.769933	1.19249	0.323734	1.60172	0	0	0.278519	1.20704
caalfmp11	COB	Cytochrome b, mitochondrially encoded subunit of the ubiquinol-cytochrome c reductase complex (complex III) that catalyzes a step in the respiratory chain of the mitochondrial inner membrane	1.49217	0.998147	0.491569	0.65485	1.2496	1.60184	0.325485	5.70438
caalfmp11.1	CaalfMp11.1	Putative endonuclease encoded by the first exon and part of the first intron of the mitochondrial COB gene; C-terminus contains a GIY-YIG domain found in intron-encoded endonucleases; conserved in fungal mitochondria	6.37339e-32	0.256345	0.116311	0.0765919	0.265823	0.238947	0.31034	0.821459
caalfmp12	NAD4L	Subunit 4L of NADH:ubiquinone oxidoreductase (NADH:ubiquinone dehydrogenase), a multisubunit enzyme complex (complex I) of the mitochondrial inner membrane that catalyzes the first step in mitochondrial respiration	0	0	1.92809	0.953952	0	0.709	3.3176	1.79721
caalfmp13	NAD5	Subunit 5 of NADH:ubiquinone oxidoreductase (NADH:ubiquinone dehydrogenase), a multisubunit enzyme complex (complex I) of the mitochondrial inner membrane that catalyzes the first step in mitochondrial respiration	0.492508	0.305123	0.538422	0.245901	0.274001	0.304598	0.213795	1.62144
caalfmp14	NAD4	Subunit 4 of NADH:ubiquinone oxidoreductase (NADH:ubiquinone dehydrogenase), a multisubunit enzyme complex (complex I) of the mitochondrial inner membrane that catalyzes the first step in mitochondrial respiration	0.361006	0.559135	0.354183	0.300407	0.794998	0.520962	0.522369	2.21666
caalfmp15	COX3B	Subunit III of cytochrome c oxidase, which is the terminal member of the mitochondrial inner membrane electron transport chain; identical to Cox3Ap; one of three mitochondrially-encoded subunits	0	0	0	0	0	0	0	0
orf19.10	ALK8	Alkane-inducible cytochrome P450; catalyzes hydroxylation of lauric acid to hydroxylauric acid; overproduction causes fluconazole resistance in WT and causes multidrug resistance in a cdr1 cdr2 double mutant; rat catheter biofilm repressed	1.31024	1.45695	0.593295	0.880625	1.92747	1.71417	1.60421	1.30355
orf19.100	orf19.100	Alpha/beta hydrolase and lipase domain protein; Hap43-repressed; Spider and flow model biofilm induced	2.41193	2.75258	3.3627	3.9613	3.39876	4.94614	5.60239	5.87086
orf19.1002	orf19.1002	Protein of unknown function; Hap43-repressed gene	6.91747	7.66826	7.05113	8.02391	10.6416	10.927	12.6743	12.1122
orf19.1005	orf19.1005	Protein with predicted RNI-like domains; rat catheter biofilm induced	0.892959	1.01423	0.675834	1.04029	2.57708	2.87177	2.45498	1.88988
orf19.1007	KCS1	Putative bZIP transcription factor; Spider biofilm induced	19.7924	21.9585	27.6223	29.0853	26.796	31.0363	25.8971	26.2425
orf19.1008	orf19.1008	Protein of unknown function	0.0148766	0	3.48635e-40	1.95213	7.47137e-15	0.0527026	5.69601e-54	8.53461e-15
orf19.101	RIM9	Protein required for alkaline pH response via the Rim101 signaling pathway; ortholog of S. cerevisiae Rim9 and A. nidulans palI; Spider biofilm induced	11.6089	13.6145	13.0768	10.7931	12.1096	11.9661	10.7838	13.0317
orf19.1010	MNT3	Mannosyltransferase; transcription elevated in cyr1, chk1, nik1, and sln1 homozygous null mutants; fungal-specific (no human or murine homolog)	8.24456	9.16293	9.45289	9.02775	10.1017	12.7439	14.7036	11.2503
orf19.1011	MNN21	Protein of unknown function	28.6912	29.0121	31.4154	29.5086	30.9228	31.9861	31.1476	34.3459
orf19.1012	orf19.1012	Protein of unknown function	65.4243	64.2691	52.3454	50.3702	81.1758	72.3866	72.8489	82.7154
orf19.102	orf19.102	Protein of unknown function	9.80851	8.51923	11.1111	12.5791	10.0711	11.0976	10.5193	11.0353
orf19.1026	orf19.1026	Protein of unknown function	53.5488	53.4751	56.0545	51.5392	44.3941	53.9497	43.9426	44.1857
orf19.1026.1	orf19.1026.1	Protein of unknown function	37.2124	32.4523	41.2312	35.5688	62.073	83.4276	83.224	77.1606
orf19.1027	PDR16	Phosphatidylinositol transfer protein; induction correlates with CDR1, CDR2 overexpression/azole resistance; fluphenazine, 17-beta-estradiol, ethynyl estradiol, NO induced; farnesol-downregulated in biofilm; rat catheter biofilm induced	24.5103	21.3798	25.3319	24.1325	30.707	29.1217	33.6158	31.2388
orf19.1028	ELA1	Elongin A; F-box protein; ubiquitin-protein ligase; role in protein ubiquitination and ubiquitin-dependent protein catabolism; rat catheter biofilm induced	16.8002	15.922	20.8694	20.6292	20.9598	22.5198	25.7089	20.3236
orf19.1029	RPP1	Putative ortholog of S. cerevisiae Rpp1; subunit of both RNase MRP and nuclear RNase P; rat catheter and Spider biofilm induced	15.0905	16.4982	20.6301	15.7135	20.2028	28.6475	22.9449	23.0883
orf19.103	KAR5	Ortholog of S. cerevisiae Kar5; involved in nuclear membrane fusion during karyogamy; induced by alpha factor	0.300455	0.155117	0.757996	0.37503	0.104472	0.278731	0.760817	0.706545
orf19.1030	orf19.1030	Putative peptidyl-prolyl cis-trans isomerase	258.774	225.193	260.672	250.556	406.395	353.86	309.621	286.246
orf19.1031	HMG1	HMG-CoA reductase; enzyme of sterol pathway; inhibited by lovastatin; gene not transcriptionally regulated in response to lovastatin and fluconazole	48.1196	44.1262	54.5086	55.3698	39.7287	34.2795	36.6014	36.0116
orf19.1032	SKO1	bZIP transcription factor; involved in cell wall damage response; represses the yeast-to-hypha transition; mutants are caspofungin sensitive; induced by osmotic stress via Hog1; induced by Mnl1 under weak acid stress	47.163	43.0677	55.7448	60.2066	23.8275	26.3247	24.0826	19.0747
orf19.1033	STR2	Protein of unknown function	47.5765	48.646	51.252	52.786	51.7696	51.6491	54.1949	52.3693
orf19.1034	orf19.1034	Protein with a predicted cytochrome b5-like Heme/Steroid binding domain; Hap43, caspofungin repressed; flow model biofilm induced	97.6951	101.985	97.8238	91.3335	153.819	153.416	161.755	174.503
orf19.1035	WAR1	Zn(II)2Cys6 transcription factor; plays a role in resistance to weak organic acids; required for yeast cell adherence to silicone substrate; Spider biofilm induced	15.1598	13.7794	13.0462	15.0091	9.92682	10.1149	9.73503	8.56973
orf19.1036	MNS1	Alpha-1,2-mannosidase; processes Man9GlcNAc2 to Man8GlcNAc2 isomer B; member of ER localized glycosyl hydrolase family 47; ER form is converted by Kex2 to cytosolic form; flow model biofilm repressed	65.46	63.4462	64.8995	67.5329	65.6963	63.0071	68.0397	67.9883
orf19.1037	orf19.1037	Protein of unknown function; rat catheter biofilm repressed	9.72198	9.69485	8.62568	10.0938	14.1316	12.6918	13.9646	14.9033
orf19.1039	BET4	Protein of unknown function	6.62244	7.35406	8.77393	8.94201	19.334	20.8651	28.16	28.7957
orf19.104	orf19.104	Protein of unknown function; induced by alpha pheromone in SpiderM medium	0.428455	0.2212	0.0900765	0.178267	0.372447	0.463722	0.232487	0.251887
orf19.1040	MAD2	Protein required for the spindle assembly checkpoint of the cell cycle; necessary for survival in host cell macrophages and for virulence in a mouse model of systemic candidiasis	5.60201	6.38688	7.75346	5.92417	17.2063	15.3743	19.4206	18.937
orf19.1041	orf19.1041	Protein of unknown function	8.15524	9.01823	9.6575	9.99849	12.8171	15.9903	19.6177	16.9048
orf19.1042	POR1	Mitochondrial outer membrane porin; in detergent-resistant membrane fraction (possible lipid raft component); antigenic in human, mouse; Hap43p-induced; flucytosine-, macrophage-, farnesol- induced; fluconazole, caspofungin repressed	1127.99	1215.35	1042.58	1036.8	1040.39	991.654	990.59	1036.47
orf19.1043	orf19.1043	Protein of unknown function	3.84636	5.54586	3.61339	3.40254	8.31371	12.1728	14.1647	15.6454
orf19.1045	orf19.1045	Putative U2 snRNP protein; Hap43p-induced gene; mutation confers hypersensitivity to 5-fluorocytosine (5-FC), 5-fluorouracil (5-FU), and tubercidin (7-deazaadenosine)	44.2074	45.569	35.4145	36.9697	105.545	84.9336	90.918	88.8886
orf19.1047	ERB1	Protein with a predicted role in ribosomal large subunit biogenesis; mutation confers hypersensitivity to 5-fluorocytosine (5-FC), 5-fluorouracil (5-FU), and tubercidin (7-deazaadenosine); hyphal, macrophage repressed	65.914	63.163	64.8831	63.9021	48.3211	53.9974	45.4681	45.5232
orf19.1048	IFD6	Aldo-keto reductase; similar to aryl alcohol dehydrogenases; protein increase correlates with MDR1 overexpression (not CDR1 or CDR2) in fluconazole-resistant clinical isolates; farnesol regulated; possibly essential; Spider biofilm induced	29.7166	24.8011	17.468	14.8255	43.4497	39.9066	39.5537	39.9239
orf19.1049	orf19.1049	Predicted NUDIX hydrolase domain; Hap43-induced	8.17268	8.19409	9.9605	8.18066	31.1355	37.2129	37.8765	37.9732
orf19.105	HAL22	Putative phosphoadenosine-5'-phosphate or 3'-phosphoadenosine 5'-phosphosulfate phosphatase; possible role in sulfur recycling; Hap43-repressed; F-12/CO2 biofilm induced	25.3706	26.1334	23.3867	26.542	15.0986	13.654	10.8985	10.804
orf19.1050	orf19.1050	Protein of unknown function	6.58665	6.47327	8.47531	8.18847	19.7569	19.9263	20.4394	19.9056
orf19.1051	HTA2	Putative histone H2A; farnesol regulated; rat catheter biofilm repressed; Spider biofilm repressed; Hap43-induced	735.883	734.189	792.56	760.941	685.99	601.253	629.05	683.25
orf19.1052	orf19.1052	Predicted histone H2B; Hap43-induced gene; Spider biofilm repressed	199.058	239.776	273.857	257.42	215.312	240.265	244.899	294.984
orf19.1053	orf19.1053	Protein of unknown function	32.5886	34.3126	32.0708	33.1444	41.5069	47.028	56.0282	52.1884
orf19.1054	orf19.1054	Protein of unknown function	65.2854	61.753	73.0046	70.388	110.152	92.922	89.7337	98.6881
orf19.1055	CDC3	Septin; essential for viability; functional homolog of S. cerevisiae Cdc3p; down-regulation associated with azole resistance; macrophage/pseudohyphal-repressed; virulence-group-correlated expression; gene has intron	108.194	100.217	131.816	135.134	161.091	136.051	138.887	155.763
orf19.1057	orf19.1057	Protein of unknown function	28.1981	28.7612	26.5343	26.1574	27.5671	28.874	25.4191	24.2802
orf19.1058	orf19.1058	Protein of unknown function	98.523	94.8114	104.851	108.611	106.587	113.428	122.989	121.676
orf19.1059	HHF1	Putative histone H4; repressed in fkh2 mutant; regulated by Efg1; fluconazole induced; amphotericin B repressed; farnesol regulated; colony morphology-related gene regulation by Ssn6; Hap43-induced; rat catheter and Spider biofilm repressed	571.062	744.598	592.848	604.375	486.635	420.042	400.779	494.766
orf19.1060	orf19.1060	Protein of unknown function	1.22853e-66	1.85276e-44	2.28484e-79	1.52596e-114	4.78055e-56	2.40444e-43	1.68397e-54	1.53781e-30
orf19.1061	HHT21	Putative histone H3; amphotericin B repressed; regulated by Efg1, farnesol; Hap43-induced; rat catheter and Spider biofilm repressed	550.126	533.993	470.39	470.913	338.021	339.51	399.787	374.318
orf19.1062	orf19.1062	Protein of unknown function	1.111	1.00377	0.934288	0.866725	0.869194	0.815949	0.703324	0.87087
orf19.1063	orf19.1063	Protein of unknown function	16.7587	19.0458	17.2046	16.4811	23.8764	26.7193	28.1861	29.9836
orf19.1064	ACS2	Acetyl-CoA synthetase; antigenic during human and murine infection; induced by Efg1; macrophage-induced protein; soluble protein in hyphae; gene contains intron; flow model and Spider biofilm repressed	659.294	647.093	549.474	574.621	512.717	442.044	457.076	449.204
orf19.1065	SSA2	HSP70 family chaperone; cell wall fractions; antigenic; beta-defensin peptides impport; ATPase domain binds histatin 5; at hyphal surface, not yeast; farnesol-repressed in biofilm; flow model, Spider biofilm repressed; caspofungin repressed	596.976	586.169	951.025	965.563	349.557	320.462	434.343	473.016
orf19.1066	GIG1	Protein induced by N-acetylglucosamine (GlcNAc); localized in cytoplasm; mutation causes increased resistance to nikkomycin Z	1.13874	1.8477	2.12044	2.7074	4.01611	3.9238	3.88395	4.14429
orf19.1067	GPM2	Putative phosphoglycerate mutase; repressed in hyphae; macrophage/pseudohyphal-repressed; induced by high levels of peroxide stress, farnesol; flow model biofilm induced; rat catheter and Spider biofilm repressed	93.3481	85.2787	76.0928	74.2854	136.047	132.903	125.093	136.143
orf19.1069	RPN4	C2H2 transcription factor; putative regulator of proteasome genes; DNA recognition sequence (GAAGGCAAAA) enriched in regions upstream of proteasome genes; induced in core stress response; Hap43-induced; Spider biofilm induced	137.05	124.623	84.1157	85.2503	135.544	151.403	136.526	130.755
orf19.107	orf19.107	DEAH-box ATP-dependent RNA helicase, required for 18S rRNA synthesis; rat catheter biofilm induced	29.9435	26.8866	32.7829	31.8649	27.3398	28.2707	24.0974	21.235
orf19.1070	orf19.1070	Protein of unknown function	15.9927	17.5654	15.382	12.6397	18.8521	22.8834	19.8041	19.2787
orf19.1075	orf19.1075	Protein of unknown function; Spider biofilm induced	6.47162	7.0999	8.27676	8.35839	9.70423	11.7155	12.3882	10.7269
orf19.1075.1	orf19.1075.1	0	3.18363	2.59608	0.762814	1.60908	5.41719	4.1158	3.83758	3.46357
orf19.1077	ATM1	Member of MDR subfamily of ABC family; ortholog of S. cerevisiae ABC transporter, Atm1; induced in low iron; induced by nitric oxide independent of Yhb1	11.9582	11.4567	15.7847	14.7283	17.1699	17.8454	18.3148	19.1669
orf19.1078	HBR2	Putative alanine glyoxylate aminotransferase; regulated by Gcn4p and hemoglobin; stationary phase enriched protein	43.8767	38.961	30.771	30.0416	78.9856	64.1584	79.0658	75.6054
orf19.1080	orf19.1080	Protein of unknown function	3.06239	1.63373	2.14608	1.8263	1.59724	1.92554	1.36629	1.4803
orf19.1082	orf19.1082	Protein with an Alba DNA/RNA-binding protein domain; Spider biofilm induced	21.3851	22.3394	34.3898	34.7582	29.4825	38.827	33.5677	34.8003
orf19.1082.1	orf19.1082.1	Protein of unknown function	162.648	171.106	165.983	170.378	206.766	267.565	282.02	248.766
orf19.1083	orf19.1083	Putative protein of unknown function; macrophage-induced gene	56.1957	58.8036	48.4202	46.9943	72.6516	75.5747	73.4009	69.8683
orf19.1084	CDC39	Protein similar to S. cerevisiae Cdc39p, which is part of the CCR4-NOT transcription regulatory complex; transposon mutation affects filamentous growth	42.8548	40.9517	47.4533	48.3442	29.5983	30.2235	33.3011	32.0076
orf19.1085	orf19.1085	Protein of unknown function	109.82	108.994	115.987	106.016	140.702	155.157	160.305	174.256
orf19.1086	orf19.1086	Protein of unknown function	70.356	65.0153	92.5161	96.1387	66.0191	76.2299	69.9174	72.8159
orf19.1087	orf19.1087	Protein of unknown function	11.68	12.636	10.8904	11.3178	14.0475	15.4054	16.9456	14.5225
orf19.1089	PEX11	Putative peroxisomal membrane protein; role in fatty acid oxidation; expression is Tac1-regulated; Hms1p-dependent induction by geldamycin; Spider biofilm induced	19.9603	21.4839	11.388	9.86019	54.8858	47.5905	59.2952	61.8656
orf19.109	orf19.109	Probable mitochondrial tyrosyl-tRNA synthetase, based on conservation in other fungi	38.6706	37.2673	35.8921	38.7343	40.0398	40.894	43.59	43.6348
orf19.1090	orf19.1090	Protein of unknown function	12.2635	17.8767	15.9749	16.8081	13.7122	10.8563	13.5697	13.5711
orf19.1091	NOP8	Ortholog of S. cereviiae Nop8; has a role in ribosomal large subunit biogenesis; rat catheter and Spider biofilm induced	48.1376	47.7655	41.6867	43.523	47.8398	54.4541	45.8926	40.4092
orf19.1092	orf19.1092	Dolichol-P-Man dependent alpha(1-3) mannosyltransferase; role in the synthesis of dolichol-linked oligosaccharide donor for N-linked glycosylation of proteins; rat catheter biofilm repressed	29.378	30.6451	25.9712	26.7731	40.3518	41.2599	45.9014	48.4504
orf19.1093	FLO8	Transcription factor; required for hyphal formation and CO2 induced white-opaque switching; regulates hyphal gene expression; required for virulence in mouse systemic infection; binds Efg1p; binds Mss11p via LisH motif; has LUFS domain	37.8896	29.3989	31.2576	36.371	22.5255	25.0162	23.5359	21.2211
orf19.1095	GLE2	Putative nuclear pore complex; possibly an essential gene, disruptants not obtained by UAU1 method; rat catheter biofilm repressed	60.5677	67.3017	68.6661	65.434	63.0466	58.0393	63.3265	62.9721
orf19.1096	orf19.1096	Protein of unknown function	9.67864	8.94912	10.1625	9.89681	10.5715	11.752	12.0663	11.6372
orf19.1097	ALS2	ALS family protein; role in adhesion, biofilm formation, germ tube induction; expressed at infection of human buccal epithelial cells; putative GPI-anchor; induced by ketoconazole, low iron and at cell wall regeneration; regulated by Sfu1p	13.0595	6.96598	2.26405	3.55771	5.64036	4.75057	5.80165	4.03243
orf19.11	orf19.11	Protein of unknown function; transcript regulated by Mig1 and Tup1; rat catheter biofilm induced	11.3876	10.1809	6.30637	6.47146	10.9131	10.3066	10.0474	7.40231
orf19.1105	orf19.1105	Protein of unknown function	0.44786	1.15609	1.31819	0.931703	5.13896	4.43177	5.34637	4.38825
orf19.1105.2	PGA56	Regulator of sorbose utilization; putative GPI-anchor; hypha and cell wall regeneration induced; colony morphology-related gene regulation by Ssn6; induced by Tbf1, Hap43; Spider biofilm induced	1.49722	6.19962	7.55763	4.98024	22.7507	24.8881	37.5167	32.705
orf19.1105.3	orf19.1105.3	Protein of unknown function	2.2123	1.14215	0.930206	1.84093	1.53848	0	1.60057	0
orf19.1106	orf19.1106	Protein with Mob2p-dependent hyphal regulation; fluconazole-induced	0.999444	0.687982	0.896506	1.05345	1.59858	1.5453	1.56669	1.35794
orf19.1107	orf19.1107	Protein of unknown function; Spider biofilm induced	26.339	27.9603	20.879	23.1508	30.6097	31.9562	38.5549	33.7549
orf19.1108	HAM1	Putative deoxyribonucleoside triphosphate pyrophosphohydrolase; caspofungin repressed; regulated by Gcn2p and Gcn4p	165.265	211.598	200.128	192.092	201.631	207.283	203.551	224.475
orf19.1109	orf19.1109	Protein of unknown function	173.727	197.724	247.373	244.031	236.393	325.963	319.67	301.266
orf19.111	CAN2	Basic amino acid permease; arginine metabolism; regulated by Nrg1/Tup1; caspofungin, flucytosine induced; colony morphology-related regulation by Ssn6; Hap43-repressed; rat catheter and Spider biofilm induced; promoter bound by Efg1	50.0048	53.2562	27.4349	27.5168	31.3811	30.7516	29.3216	24.1186
orf19.1110	orf19.1110	Thiamine pyrophosphokinase, phosphorylates thiamine to produce the coenzyme thiamine pyrophosphate (thiamine diphosphate); active as a homodimer	15.9495	16.6248	12.6498	13.7754	19.0819	20.2894	17.8285	19.0792
orf19.1111	orf19.1111	Protein of unknown function	48.1729	49.5536	57.5368	54.6849	36.9395	39.6342	38.181	43.5704
orf19.1112	BUD7	Protein of unknown function	28.1366	32.127	35.23	36.2046	37.6899	38.056	41.0805	40.0875
orf19.1113	orf19.1113	Protein of unknown function	24.6072	30.9246	52.3889	56.2679	27.4945	34.3046	28.002	24.3718
orf19.1114	orf19.1114	Cytochrome c oxidase subunit; membrane-localized protein; rat catheter biofilm induced	176.517	174.242	134.323	118.426	220.242	291.014	255.234	234.502
orf19.1115	GUK1	Putative guanylate kinase; identified in extracts from biofilm and planktonic cells; protein level decrease in stationary phase cultures; Hap43p-induced gene	77.7893	92.544	90.9251	84.6961	90.1853	94.7164	90.6135	98.9202
orf19.1116	orf19.1116	Protein of unknown function; planktonic growth-induced gene	14.7158	14.3453	24.5965	25.3277	27.1415	26.8513	26.1208	28.3004
orf19.1117	orf19.1117	Protein similar to Candida boidinii formate dehydrogenase; virulence-group-correlated expression; Hap43-repressed; Spider biofilm repressed	1.24228	1.01267	0.494849	0.816114	1.22766	0.606555	1.41912	0.717515
orf19.1119	MTR10	Putative importin; member of a family of fungal-specific nuclear importins; Mig1-regulated	38.7063	40.6456	43.4543	40.7885	47.3933	43.5957	51.5809	48.6629
orf19.1120	FAV2	Adhesin-like protein; induced by mating factor in MTLa/a opaque cells, in cyr1 null, in filaments; regulated by Nrg1, Rfg1, Tup1, Tec1, Efg1, Ntd80, Rob1, Brg1; induced in oralpharyngeal candidasis; Spider biofilm induced	12.5668	14.3625	9.84187	9.97831	9.8066	9.07733	9.36953	9.625
orf19.1121	orf19.1121	Protein of unknown function	29.7083	29.8796	23.183	23.2253	49.8336	47.4958	43.9164	50.668
orf19.1122	orf19.1122	Protein of unknown function; induced by alpha pheromone in SpiderM medium; Spider biofilm induced	0.224285	0.115793	0.660137	0.46659	0.857852	0.762918	0.973607	0.615329
orf19.1123	orf19.1123	Dubious open reading frame	2.37772	2.94613	0.799809	1.58287	1.65352	1.17643	1.03215	2.23656
orf19.1124	orf19.1124	Protein of unknown function; flow model biofilm induced; Spider biofilm induced	13.5385	12.5546	12.6179	11.7682	20.4492	14.9329	13.975	19.2644
orf19.1124.2	orf19.1124.2	Protein of unknown function	7.75736	11.7372	12.9824	14.1886	9.50739	7.36273	9.7244	8.66949
orf19.113	CIP1	Possible oxidoreductase; transcript induced by cadmium but not other heavy metals, heat shock, yeast-hypha switch, oxidative stress (via Cap1), or macrophage interaction; stationary phase enriched protein; Spider biofilm induced	26.6663	27.109	19.7407	16.9638	73.0318	67.6241	80.8956	79.9788
orf19.1133	MSB1	Putative regulator of transcription; expression in S. cerevisiae flo8 and flo11 mutants suggests a role in regulation of adhesion factors	17.1156	15.2385	24.6641	25.5049	13.6856	15.7685	15.4909	12.7444
orf19.1135	CAS1	Putative transcription factor with Ku70/Ku80 beta-barrel DNA-binding motif; involved in telomerase regulation and telomere protection; mutation causes marginal increase in caspofungin sensitivity	17.4955	16.875	16.2141	16.7673	25.7322	23.7245	27.7089	28.2574
orf19.1136	orf19.1136	Protein of unknown function	6.98067	8.97307	5.27943	5.69033	8.14262	8.12084	13.4228	12.7692
orf19.1137	orf19.1137	Protein of unknown function	14.0059	16.4565	15.3793	14.5686	16.4898	18.5867	21.8723	20.6633
orf19.1139	orf19.1139	Protein of unknown funtion; S. cerevisiae ortholog Svl3 plays a role in endocytosis and is localized to the bud neck; Spider biofilm induced	66.0607	59.8674	71.8059	78.997	51.6908	58.917	51.6061	49.3562
orf19.114	orf19.114	Protein of unknown function	8.50557	9.22151	9.29686	8.54558	12.5593	13.2386	13.0243	11.3099
orf19.1140	orf19.1140	Protein of unknown function; Spider biofilm repressed	70.5348	85.6022	79.6033	72.3049	118.032	138.998	154.171	157.199
orf19.1142	AVT4	Putative vacuolar transporter of large neutral amino acids; induced by alpha pheromone in SpiderM medium	10.3797	10.5458	8.61685	8.99726	9.85577	10.5963	9.55552	10.5093
orf19.1143	orf19.1143	Protein of unknown function	11.094	9.41638	11.5149	13.1115	15.2968	15.8047	15.408	15.7219
orf19.1144	orf19.1144	Protein with SEL-1 like protein domain; early-stage flow model biofilm induced	43.0756	39.8035	45.5723	46.8822	32.7034	28.1034	24.6725	27.4644
orf19.1146	orf19.1146	Protein of unknown function	27.424	25.469	33.5524	32.2517	18.6154	17.666	19.0463	23.4329
orf19.1148	orf19.1148	Protein of unknown function	0.243738	0.377507	1.3323	0.60847	1.18651	1.73355	1.41073	0.955282
orf19.1149	MRF1	Putative mitochondrial respiratory protein; induced by farnesol, benomyl, nitric oxide, core stress response; oxidative stress-induced via Cap1; stationary-phase enriched protein; Spider biofilm induced	228.098	239.759	183.458	187.164	247.321	235.892	237.568	243.077
orf19.115	orf19.115	Protein of unknown function	5.78335	7.09125	10.1823	8.68041	9.6896	12.0158	9.1241	9.36257
orf19.1150	orf19.1150	GATA-like transcription factor; oral infection induced; mutant has reduced capacity to damage oral epithelial cells; regulated by Gcn2 and Gcn4; Spider biofilm induced	16.6345	14.6955	14.9416	15.8035	14.594	15.8383	16.7571	14.3182
orf19.1150.1	orf19.1150.1	Protein of unknown function	0.60451	1.56063	1.20695	1.69786	1.41848	1.72866	1.69401	1.30253
orf19.1152	orf19.1152	Protein of unknown function; induced in core stress response; Gcn2 and Gcn4 regulated; flow model biofilm induced; Spider biofilm induced	214.089	190.482	168.209	160.656	222.499	217.197	206.572	214.063
orf19.1153	GAD1	Putative glutamate decarboxylase; alkaline, macrophage-downregulated gene; amphotericin B induced; induced by Mnl1 under weak acid stress; stationary phase enriched protein; rat catheter biofilm repressed	439.26	426.85	309.689	305.894	444.002	446.915	470.422	463.203
orf19.1154	EGD1	Putative GAL4 DNA-binding enhancer protein; soluble protein in hyphae; biofilm induced; macrophage/pseudohyphal-induced; equal level of protein in exponential and stationary growth phase yeast cultures; Spider biofilm repressed	1967.81	2034.87	1685.37	1618.56	2116.8	1926.12	1829.86	1933.71
orf19.1155	DPP2	Protein similar to S. cerevisiae pyrophosphate phosphatase Lpp1p; possible role in farnesol biosynthesis	21.4612	20.2026	26.2231	24.7783	13.7766	14.2562	16.9425	15.6244
orf19.1156	FUS1	Membrane protein required for mating; ortholog of S. cerevisiae Fus1; transcript induced by Cph1 in cells homozygous for the MTLa locus; alpha factor induced	2.1336	2.65885	3.15538	2.93869	5.21873	5.05072	3.88572	4.55597
orf19.1158	orf19.1158	Ortholog of S. cerevisiae Yft2 required for normal ER membrane biosynthesis; Hap43-repressed gene	5.29091	6.22987	7.02528	5.94759	7.74615	7.463	9.60337	9.31331
orf19.1159	orf19.1159	Protein similar to A. nidulans CysA serine O-trans-acetylase; suggests that C. albicans uses an O-acetyl-serine (OAS) pathway of sulfur assimilation; F-12/CO2 early biofilm induced; Spider biofilm induced	50.7951	48.0405	45.093	45.9006	42.4289	35.9532	37.4784	36.8084
orf19.1160	orf19.1160	Protein of unknown function	62.0142	61.9948	62.4106	58.2264	52.347	61.252	47.9863	50.5441
orf19.1161	PLD1	Phospholipase D1; required for phosphatidic acid and for most diacylglycerol production; required for wild-type mouse virulence, but not rat oral virulence; mutant defect in hyphal growth on solid substrates; similar to S. cerevisiae Spo14p	73.7439	64.0333	59.0505	59.9385	40.8257	32.3313	33.577	32.2581
orf19.1162	orf19.1162	Protein of unknown function; transcript upregulated by benomyl treatment	126.142	123.686	114.147	110.782	200.189	190.811	186.662	189.464
orf19.1162.1	orf19.1162.1	Protein of unknown function	12.1413	13.4129	15.4889	16.7794	14.5966	14.8222	18.4221	15.4011
orf19.1163	orf19.1163	Protein of unknown function	24.437	23.5263	23.2797	21.7591	24.9963	21.4648	20.9682	21.1446
orf19.1164	GAR1	Putative H/ACA snoRNP pseudouridylase complex protein; mutation confers hypersensitivity to tubercidin (7-deazaadenosine); macrophage/pseudohyphal-induced; Spider biofilm repressed	381.445	365.829	330.276	349.638	184.958	181.45	146.161	164.191
orf19.1166	CTA3	Protein similar to <iS. cerevisiae</i Ede1p, which is involved in endocytosis; activates transcription in 1-hybrid assay in S. cerevisiae	112.076	104.92	88.3784	89.1257	72.2865	65.3524	62.7521	62.9381
orf19.1167	orf19.1167	Protein of unknown function	3.96861	3.47925	4.093	4.23707	4.42619	3.42696	3.03377	2.64127
orf19.1168	ZCF3	Zn(II)2Cys6 domain transcription factor; required for filamentous growth, resistance to rapamycin and flucytosine; possibly an essential gene, disruptants not obtained by UAU1 method; Hap43-repressed; Spider and flow model biofilm induced	90.1448	90.9455	100.953	102.702	48.926	61.3332	53.8901	53.3579
orf19.1169	orf19.1169	Putative DnaJ-like molecular chaperone; Spider biofilm induced	27.665	26.6011	21.8648	19.3931	33.6267	36.818	36.0735	32.87
orf19.117	orf19.117	Protein of unknown function	39.8445	39.6784	32.2432	30.8337	39.4134	38.9552	37.9598	35.8433
orf19.1170	ARO7	Putative chorismate mutase; fungal-specific (no human or murine homolog); alkaline upregulated	40.5033	32.2967	43.565	38.0762	48.2619	46.6993	47.9995	52.1966
orf19.1171	BTA1	Protein of unknown function	0.857178	1.06209	0.173001	0.142658	0.429193	0.551339	0.570547	0.349392
orf19.1177	orf19.1177	Ortholog of S. cerevisiae Rtt106; histone chaperone that regulates chromatin structure in transcribed and silenced chromosomal regions; affects transcriptional elongation; Hap43-repressed; Spider biofilm repressed	58.8875	59.219	61.4493	65.8119	34.3755	37.2932	33.9858	30.2756
orf19.1178	orf19.1178	Putative transcription factor with bZIP DNA-binding motif; Hap43p-repressed gene	10.6718	10.6894	11.2843	8.34544	6.74638	5.09935	4.68116	4.05742
orf19.1179	orf19.1179	Protein of unknown function; induced in high iron; possibly subject to Kex2 processing; Hap43-repressed	375.535	404.17	366.663	369.213	284.667	341.635	261.658	285.815
orf19.118	FAD2	Delta-12 fatty acid desaturase, involved in production of linoleic acid, which is a major component of membranes	178.84	206.54	160.84	162.476	206.097	214.991	225.15	219.751
orf19.1180	orf19.1180	Putative 2-aminoadipate transaminase; rat catheter and Spider biofilm repressed	112.037	107.169	84.3418	81.4802	65.1087	63.4817	54.7331	54.5095
orf19.1181	orf19.1181	Protein of unknown function	1.19368e-10	0.168246	0.205842	0.135837	0.171092	0.151635	0.0598978	0.0646863
orf19.1182	orf19.1182	Protein of unknown function	27.8194	27.0161	26.5788	25.2502	20.3442	19.4393	17.575	16.7893
orf19.1183	orf19.1183	Protein of unknown function	71.4137	67.7565	53.5663	55.9334	57.3091	51.668	50.5858	53.5196
orf19.1185	orf19.1185	Protein of unknown function	80.277	80.1875	80.9345	81.7895	50.9926	52.4195	49.5388	46.7312
orf19.1186	orf19.1186	Protein of unknown function	43.8069	50.5321	57.5174	50.2487	49.557	48.1127	52.2073	54.0399
orf19.1187	CPH2	Myc-bHLH transcription factor; promotes hyphal growth; directly regulates Tec1 to induce hypha-specific genes; probably homodimeric, phosphorylated; required for colonization of the mouse GI tract; rat catheter and Spider biofilm induced	72.5039	64.67	60.2237	59.2138	55.891	57.5601	57.7343	53.3121
orf19.1189	orf19.1189	Protein of unknown function; regulated by yeast-hypha switch; induced by Mnl1 in weak acid stress; 5' UTR intron; repressed by chlamydospore formation in C. albicans and C. dubliniensis; rat catheter, Spider and flow model biofilm induced	58.6768	52.5105	48.1126	50.1955	43.3029	45.1225	44.0628	39.7501
orf19.119	orf19.119	Protein of unknown function	6.24937	5.50637	6.867	7.55782	12.7481	15.7693	16.6989	17.5698
orf19.1190	STV1	Predicted subunit a of vacuolar proton-translocating ATPase V0 domain, Golgi isoform	69.0115	63.8485	47.1607	48.2099	46.0497	38.8389	40.8178	42.2608
orf19.1191	orf19.1191	Protein of unknown function	54.2175	51.0594	48.1118	46.326	38.9575	39.7705	40.6981	40.3569
orf19.1192	DNA2	Protein similar to S. cerevisiae Dna2p, which is a DNA replication factor involved in DNA repair; induced under hydroxyurea treatment	10.5201	9.67132	12.0466	12.6369	8.46535	8.32718	7.9724	7.92234
orf19.1193	GNP1	Similar to asparagine and glutamine permease; fluconazole, caspofungin induced; regulated by Nrg1, Mig1, Tup1, Gcn2, Gcn4, and alkaline regulated by Rim101; repressed during chlamydospore formation; rat catheter, flow model biofilm induced	439.207	423.453	281.245	305.265	266.652	246.461	229.75	221.547
orf19.1195	orf19.1195	Protein of unknown function	43.4049	44.1038	38.3968	40.8213	34.1773	29.7073	31.5117	31.1253
orf19.1196	PKH3	Protein of unknown function	31.5536	27.8364	26.5796	28.3778	21.6097	20.057	18.4476	19.3408
orf19.1198	orf19.1198	Predicted mitochondrial intermembrane space protein of unknown function; possibly an essential gene, disruptants not obtained by UAU1 method	39.198	41.108	48.7735	44.0497	79.8907	88.202	81.9448	84.7675
orf19.1199	NOP5	Ortholog of S. cerevisiae Nop58; involved in pre-rRNA process; Tn mutation affects filamentous growth; macrophage/pseudohyphal-induced; physically interacts with TAP-tagged Nop1; Spider biofilm repressed	314.978	302.567	279.149	277.802	227.43	197.86	165.309	169.766
orf19.120	orf19.120	Protein of unknown function	0.69997	1.98757	2.20738	1.01932	1.88625	2.16453	3.35504	3.63499
orf19.1200	orf19.1200	Protein of unknown function; Spider biofilm induced	29.2738	32.8264	33.9704	33.7896	30.8744	34.4293	29.0235	26.4296
orf19.1201	orf19.1201	Protein of unknown function	48.3014	47.3931	43.3696	41.9798	36.072	34.3931	32.7268	28.6065
orf19.1202	orf19.1202	Protein of unknown function	15.1561	15.9406	20.7282	16.2373	16.7196	15.3862	18.4521	17.0224
orf19.1203	SRO77	Protein with a predicted role in docking and fusion of post-Golgi vesicles with the plasma membrane; filament induced; fungal-specific (no human or murine homolog)	44.62	42.1478	35.4874	38.0839	25.7272	26.3579	28.033	27.7039
orf19.1203.1	orf19.1203.1	Predicted dolichol-phosphate mannosyltransferase subunit; flow model and Spider biofilm repressed	94.679	115.821	126.407	117.561	102.507	111.37	111.84	150.983
orf19.1204	orf19.1204	Phosphorylated protein of unknown function; transcript is upregulated clinical isolates from HIV positive patients with oral candidiasis	27.0456	29.0176	25.2574	25.1461	27.893	28.6806	31.8792	27.2925
orf19.1207	orf19.1207	Protein of unknown function	19.2283	13.6143	7.39195	12.3433	11.4615	8.83407	11.5267	12.9191
orf19.1208	orf19.1208	Predicted ORF in the Major Repeat Sequence on chromosome 4; member of a family encoded by FGR6-related genes in the RB2 repeat sequence	5.67931	4.1394	4.42479	5.00396	3.48487	2.58268	5.0153	3.6007
orf19.121	ARC18	Putative ARP2/3 complex subunit; mutation confers hypersensitivity to cytochalasin D	15.7816	15.0636	15.8176	13.4378	47.6003	59.243	84.4386	79.1859
orf19.1210	orf19.1210	Protein of unknown function	33.2422	36.4096	25.1946	26.5065	38.4509	33.9615	37.1715	35.7215
orf19.1212	orf19.1212	Protein of unknown function	163.509	160.598	196.087	202.924	119.182	143.168	139.523	138.185
orf19.1214	orf19.1214	Protein of unknown function	235.106	220.5	196.018	191.85	346.664	312.428	309.998	290.945
orf19.1215	orf19.1215	Protein of unknown function	1.13147	1.03849	0.634333	0.784615	1.04913	1.01078	0.909562	1.03473
orf19.1217	orf19.1217	Protein of unknown function	15.7904	17.3472	18.0434	16.9525	15.692	16.4693	17.5907	16.78
orf19.1219	orf19.1219	Protein of unknown function	10.5907	12.0646	12.5848	12.7883	9.48645	8.75701	12.0764	9.47467
orf19.122	CDC20	Activator of anaphase-promoting complex/cyclosome; induced under Cdc5 depletion; member of conserved Mcm1 regulon; mRNA expression peaks at cell-cycle G2/M phase; mRNA binds She3 and is localized to buds of yeast cells and to hyphal tips	12.7173	10.9146	18.2101	19.1845	8.37331	10.5928	11.0072	10.2795
orf19.1220	RVS167	SH3-domain- and BAR domain-containing protein involved in endocytosis; null mutant exhibits defects in hyphal growth, virulence, cell wall integrity, and actin patch localization; cosediments with phosphorylated Myo5p	221.058	213.644	193.8	200.229	170.494	186.311	163.407	157.023
orf19.1221	ALG2	Putative mannosyltransferase involved in cell wall mannan biosynthesis; transcription is elevated in chk1, nik1, and sln1 homozygous null mutants	26.4252	28.1825	31.6783	31.5593	35.2961	38.5658	39.1982	40.8264
orf19.1223	DBF2	Essential serine/threonine protein kinase involved in mitotic spindle formation and cytokinesis; required for septum formation, exit from mitosis, and normal hyphal morphogenesis; virulence-group-correlated expression	10.0548	10.2535	14.2409	13.3406	13.9198	16.5571	17.4319	17.5445
orf19.1224	FRP3	Putative ammonium transporter; upregulated in the presence of human neutrophils; fluconazole-downregulated; repressed by nitric oxide; Spider biofilm induced; rat catheter biofilm repressed	47.9679	47.1834	29.312	29.8694	34.983	32.6772	38.649	40.195
orf19.1225	PEX22	Putative peroxin	27.5676	25.1356	20.8102	20.324	34.7546	40.3805	39.2482	41.6386
orf19.1227	ZCF4	Putative Zn(II)2Cys6 transcription factor	3.34776	4.02784	5.29969	3.08821	10.9746	10.7073	12.2189	9.02125
orf19.1228	HAP2	CCAAT-binding transcription factor; regulates low-iron induction of FRP1; in these conditions CBF comprises Hap43 and probably Hap2 and Hap3; possibly essential, disruptants not obtained by UAU1 method; Cap1-dependent induction in low iron	48.9054	55.5068	40.4329	38.7984	44.0644	39.8782	44.1228	41.3774
orf19.1229	orf19.1229	Protein of unknown function	13.1331	14.5886	18.3654	17.9087	21.1681	23.6073	27.5855	29.904
orf19.123	RCN1	Protein involved in calcineurin-dependent signaling that controls stress response and virulence; inhibits calcineurin function	17.1557	17.9757	15.3432	16.6564	16.5527	18.3609	18.7973	21.2251
orf19.1232	VRG4	GDP-mannose transporter; essential; required for glycosylation, hyphal growth; functional homolog of S. cerevisiae Vrg4p, which imports GDP-mannose from cytoplasm to Golgi for protein and lipid mannosylation; no mammalian homolog	13.9966	14.977	24.4588	16.5913	47.8165	53.4897	56.8697	48.3433
orf19.1233	ADE4	Putative phosphoribosylpyrophosphate amidotransferase; flucytosine induced	0.80065	0.807954	0.656934	2.60454	3.30428	2.44113	2.22083	1.22468
orf19.1234	FGR6-10	Protein lacking an ortholog in S. cerevisiae; member of a family encoded by FGR6-related genes in the RB2 repeat sequence; transposon mutation affects filamentous growth	4.99981	6.00854	5.17753	5.43313	3.26584	3.45586	3.14561	4.14705
orf19.1235	HOM3	Putative L-aspartate 4-P-transferase; fungal-specific (no human or murine homolog); regulated by Gcn2 and Gcn4; early-stage flow model biofilm induced	44.4432	42.1965	71.3946	67.8076	42.0001	46.3024	50.715	52.6265
orf19.1236	GVP36	BAR domain protein; ocalizes to early and late Golgi vesicles; predicted role in adaptation to varying nutrient concentrations, fluid-phase endocytosis, actin cytoskeleton polarization and vacuole biogenesis; rat catheter biofilm repressed	90.0339	90.0399	94.4896	91.3079	142.992	146.602	152.517	137.598
orf19.1237	ARO9	Aromatic transaminase; Ehrlich fusel oil pathway of aromatic alcohol biosynthesis; Rim101-dependent pH-regulation (alkaline induced); Hap43-induced gene	24.6262	24.3926	17.4085	16.1686	27.5696	23.7709	26.703	26.5632
orf19.1238	TUB4	Putative gamma-tubulin; induced upon adherence to polystyrene; transcript regulated by Nrg1 and Mig1; periodic mRNA expression, peak at cell-cycle S/G2 phase	9.67976	10.789	12.8843	13.8419	7.84549	8.6013	8.90131	8.57861
orf19.1239	orf19.1239	Secreted protein; exogenously expressed protein is a substrate for Kex2 processing in vitro; fluconazole-regulated; Spider biofilm induced	0	0.192063	0.351951	0.193481	0.0970162	0.460159	0.302795	0.729025
orf19.124	CIC1	Putative proteasome-interacting protein; rat catheter biofilm induced	54.1706	54.9443	70.2195	68.966	54.8108	70.918	56.2102	46.844
orf19.1240	orf19.1240	Protein of unknown function	31.1178	28.9386	29.7438	30.6781	24.5537	22.5761	25.942	25.3363
orf19.1244	GYP2	Protein of unknown function	18.6218	19.926	21.086	20.7625	17.3369	17.0199	18.5254	17.7593
orf19.1246	orf19.1246	Putative eisosome component role in proper eisosome assembly; upregulated in cyr1 null mutant	145.615	127.698	105.874	111.732	88.5126	86.9745	80.8898	77.155
orf19.1247	orf19.1247	Protein of unknown function	31.8945	33.6881	32.0081	31.3902	33.2271	34.8469	36.4309	32.1397
orf19.1248	orf19.1248	Putative RNA polymerase II subunit B44; heterozygous null mutant exhibits resistance to parnafungin in the C. albicans fitness test; Spider biofilm repressed	112.16	117.199	99.1582	95.1975	80.96	67.8878	72.4424	72.3957
orf19.1249	orf19.1249	Protein of unknown function	47.4181	52.8513	49.9998	47.0885	40.4909	42.4429	38.5091	36.142
orf19.125	EBP1	NADPH oxidoreductase; interacts with phenolic substrates (17beta-estradiol); possible role in estrogen response; induced by oxidative, weak acid stress, NO, benomyl, GlcNAc; Cap1, Mnl1 induced; Hap43-repressed; rat catheter biofilm induced	75.2565	84.0079	82.0293	74.958	67.6737	71.6856	67.4184	63.3903
orf19.1250	orf19.1250	Protein of unknown function	93.4364	79.1917	95.0525	94.794	81.9204	87.5855	72.2262	68.7602
orf19.1251	BRN1	Putative condensin complex subunit; cell-cycle regulated periodic mRNA expression	25.009	24.6225	28.9604	28.0256	21.8354	20.9876	20.5032	19.4281
orf19.1252	YME1	Protein of unknown function	246.801	246.018	200.991	212.691	222.544	205.276	202.328	194.775
orf19.1253	PHO4	bHLH transcription factor of the myc-family; required for growth in medium lacking phosphate and for resistance to copper and Phloxine B; induced by Mnl1 under weak acid stress	48.4893	45.5387	54.8692	56.9881	27.7674	28.4923	26.0212	24.8729
orf19.1254	SEC23	Putative GTPase-activating protein; regulated upon yeast-hypha switch; Spider biofilm repressed	198.571	195.499	185.823	184.579	153.668	141.852	147.072	142.128
orf19.1255	ZCF5	Zn(II)2Cys6 transcription factor; colony morphology-related gene regulation by Ssn6	2.02112	2.13974	0.645434	0.681255	0.90737	1.06012	0.906971	0.381028
orf19.1257	orf19.1257	Protein of unknown function	1.09876	2.26905	0.461997	0.45716	1.52821	1.01932	2.38482	1.72255
orf19.1258	orf19.1258	Adhesin-like protein; regulated by Tsa1, Tsa1B in minimal media at 37 deg; clade-associated gene expression; induced by alpha pheromone in SpiderM medium; Hap43-induced; Spider biofilm repressed	22.5456	20.4781	8.02435	6.38341	3.7733	4.22359	3.65485	3.51985
orf19.1259	orf19.1259	Protein of unknown function	40.9856	42.4373	35.7521	38.3689	25.7985	25.7567	28.5581	25.9181
orf19.1260	LEA1	Predicted component of U2 snRNP; induced by alpha pheromone in SpiderM medium	20.145	15.4886	27.6156	28.4384	32.1271	33.9461	34.7344	28.313
orf19.1261	CGT1	mRNA 5' guanylyltransferase; small subunit of mRNA capping enzyme; binds an RNA Pol II C-terminal domain peptide; Cet1p and Cgt1p form a 2:1 complex; functional homolog of S. cerevisiae Ceg1p	23.0304	19.7519	21.4272	25.3638	17.6937	17.1858	18.5803	19.4014
orf19.1263	CFL1	Protein similar to ferric reductase Fre10p; possible functional homolog of S. cerevisiae Fre1p (reports differ); transcription is negatively regulated by Sfu1p, copper, amphotericin B, caspofungin; induced by ciclopirox olamine	15.2962	13.746	9.96507	10.1712	9.91027	10.2514	10.3848	10.0886
orf19.1264	CFL2	Oxidoreductase; iron utilization; Sfu1/Sef1/Hap43/Nrg1/Tup1/Rim101 regulated; alkaline/low iron/fluphenazine/ciclopirox olamine, flucytosine, fluconazole, Spider/flow model/rat catheter biofilm induced; caspofungin/amphotericin B repressed	33.4808	33.0926	15.5169	14.8883	13.178	11.6812	11.6388	8.17085
orf19.1265	orf19.1265	Protein of unknown function	12.7776	11.9977	14.9376	15.5979	9.1042	8.99496	9.88344	9.70811
orf19.1266	orf19.1266	Protein of unknown function; transcript detected on high-resolution tiling arrays	55.5726	57.1349	42.4105	42.5847	78.082	77.6151	74.4714	75.7208
orf19.1267	orf19.1267	Protein of unknown function	190.427	172.664	141.963	149.138	164.054	158.893	162.343	154.694
orf19.1267.1	orf19.1267.1	Protein of unknown function	312.335	310.136	208.11	217.556	320.602	267.226	282.283	380.146
orf19.1268	orf19.1268	Protein of unknown function; transcript detected on high-resolution tiling arrays; rat catheter biofilm induced	8.24492	6.38496	5.63347	3.43045	7.88385	10.1984	10.0661	9.29037
orf19.1270	FRE3	Protein with similarity to ferric reductase Fre10p; possibly an essential gene, disruptants not obtained by UAU1 method	5.89929	5.3439	4.10877	3.614	3.47328	4.29762	4.24189	3.14901
orf19.1272	orf19.1272	Protein of unknown function; may play a role in regulation of cell size; rat catheter biofilm repressed	41.1908	44.2871	43.0525	42.2223	37.9419	36.0964	36.4958	34.346
orf19.1273	orf19.1273	Protein of unknown function	225.722	245.092	287.176	265.908	264.734	296.375	289.19	318.587
orf19.1274	orf19.1274	Protein of unknown function	0.481586	0.24863	0.323988	0.160298	0.401887	0.506334	0.31358	0.301997
orf19.1275	GAT1	GATA-type transcription factor; regulator of nitrogen utilization; required for nitrogen catabolite repression and utilization of isoleucine, tyrosine and tryptophan N sources; required for virulence in a mouse systemic infection model	9.73939	9.37982	6.16317	7.7513	5.98496	5.09435	6.07682	6.1838
orf19.1276	orf19.1276	Protein with a selenoprotein domain and a thioredoxin-like fold domain; similar to S. cerevisiae Vhs3p, which is a putative phosphopantothenoylcysteine decarboxylase	18.4677	17.9269	16.7392	19.5087	36.0677	42.4036	49.0848	50.2763
orf19.1277	orf19.1277	Protein of unknown function; Rgt1, Hap43-repressed; flow model biofilm induced; Spider biofilm induced	37.5103	34.9039	31.1283	29.8566	31.0345	35.9443	38.1328	37.8091
orf19.1279	CDS1	Protein similar to S. cerevisiae Cds1p; transposon mutation affects filamentous growth	76.3475	75.9489	67.7683	70.1296	70.9189	68.6838	76.5952	75.4815
orf19.1280	SUI1	Putative translation initiation factor; flucytosine induced; genes encoding ribosomal subunits, translation factors, and tRNA synthetases are downregulated upon phagocytosis by murine macrophage	309.665	346.666	389.375	370.846	496.009	551.798	616.279	610.945
orf19.1281	orf19.1281	Putative splicing factor required for the first step of pre-mRNA splicing; Spider biofilm induced	34.4552	34.5271	33.2988	36.2748	30.9732	31.2847	28.6047	29.074
orf19.1282	CKS1	Protein of unknown function	35.5552	31.5153	48.514	46.7668	59.2689	59.2767	67.65	74.1647
orf19.1283	MEC1	Cell cycle checkpoint protein with a role in genome integrity; RNA abundance regulated by tyrosol and cell density	12.6382	12.5107	13.4287	13.08	11.6123	10.4933	11.7428	11.2345
orf19.1285	orf19.1285	Plasma membrane-localized protein of unknown function; Hap43p-repressed gene	42.1434	36.7549	34.5379	36.2365	34.2048	34.1284	34.1523	32.0426
orf19.1286	orf19.1286	Protein of unknown function	0.813291	1.21299	1.37745	1.01515	2.45085	3.46505	2.7459	2.16044
orf19.1287	orf19.1287	Protein of unknown function; flow model biofilm induced; Spider biofilm induced	26.6266	21.9695	26.0425	36.3002	58.9613	78.2063	87.2913	77.5948
orf19.1288	FOX2	3-hydroxyacyl-CoA epimerase; fatty acid beta-oxidation; induced by phagocytosis; regulated by Mig1, by white-opaque switch, by DNA methylation; transcriptional activation by oleate requires Ctf1; rat catheter and Spider biofilm induced	35.2105	30.3306	24.3984	26.3347	49.6589	42.4341	42.3947	42.751
orf19.1289	SCT1	Putative glycerol-3-phosphate O-acyltransferase; fungal-specific (no human or murine homolog)	25.6425	27.0449	26.0178	26.4679	25.8228	26.9746	27.4094	27.7455
orf19.1290	XKS1	Putative xylulokinase; Hap43-repressed; induced by prostaglandins; rat catheter biofilm repressed	52.2857	50.1661	42.3604	45.1082	50.2169	47.8165	51.5439	55.1038
orf19.1291	ABZ1	Protein of unknown function	33.2699	33.5675	39.1447	38.5398	23.9597	21.0785	23.9748	26.0541
orf19.1295	VAS1	Putative tRNA-Val synthetase; genes encoding ribosomal subunits, translation factors, and tRNA synthetases are downregulated upon phagocytosis by murine macrophage	75.3976	73.4093	110.621	109.318	91.1008	91.5009	95.6736	95.1579
orf19.1296	orf19.1296	Protein of unknown function	8.77141	10.244	10.6437	8.88739	16.9492	16.4359	17.0371	16.4247
orf19.1297	orf19.1297	Protein of unknown function	10.5791	12.0162	9.44591	9.34683	14.2523	14.2785	17.1085	16.9003
orf19.1298	NUP84	Protein of unknown function	35.0358	36.1759	35.7495	34.9383	51.8321	46.9123	52.0321	48.7074
orf19.1299	RPN6	Putative 26S proteasome subunit; Hap43p-induced gene; regulated by Gcn2p and Gcn4p	28.1501	38.1289	31.9289	31.1656	46.8836	50.8457	57.102	67.4342
orf19.130	VPS15	Protein involved in retrograde endosome-to-Golgi protein transport; required for normal virulence	10.6731	10.7646	9.5617	9.93854	13.0457	12.0618	14.9731	14.0733
orf19.1300	orf19.1300	Putative mitochondrial membrane protein; homozygous transposon insertion causes decreased colony wrinkling under filamentous growth-inducing conditions, but does not block true hyphal formation in liquid media	43.6425	46.2312	45.083	46.5838	51.8947	58.9504	58.5889	59.3842
orf19.1301	orf19.1301	Protein of unknown function	38.4541	37.941	40.1398	38.5005	113.759	113.848	122.236	123.434
orf19.1302	orf19.1302	Protein of unknown function	0.16031	0.827638	2.02217	1.6008	2.45263	2.28035	1.9717	2.76453
orf19.1303	orf19.1303	Protein of unknown function	29.5456	27.8574	29.7711	28.9119	36.7004	36.5458	37.6103	33.94
orf19.1304	orf19.1304	Protein of unknown function	59.5793	66.0496	50.234	58.3433	57.6382	56.0563	60.4671	56.4121
orf19.1305	orf19.1305	Protein of unknown function	23.5728	26.904	35.9102	33.1683	34.585	42.053	37.2783	40.6962
orf19.1306	orf19.1306	Protein of unknown function	55.2995	59.6658	50.6746	48.4694	38.0021	46.2217	43.7798	43.9951
orf19.1307	orf19.1307	Predicted membrane protein; rat catheter biofilm induced	4.21237	4.70767	3.37566	3.01041	4.58362	5.94599	4.87617	5.59383
orf19.1308	orf19.1308	Predicted membrane transporter, member of the drug:proton antiporter (14 spanner) (DHA2) family, major facilitator superfamily (MFS)	46.3759	48.9112	38.9256	36.6489	30.7168	31.6752	28.3605	28.289
orf19.1309	orf19.1309	Protein of unknown function	14.3317	17.6897	18.8401	14.5304	18.7876	18.3385	15.4936	20.402
orf19.131	orf19.131	Protein of unknown function	9.38704	12.6959	13.0084	13.4222	10.0218	13.5735	12.9133	10.0527
orf19.131.2	orf19.131.2	Protein of unknown function	256.031	301.899	305.256	277.251	269.529	317.926	298.382	326.765
orf19.1310	orf19.1310	Protein of unknown function	4.44697	3.40487	4.64286	4.45313	3.36771	4.04659	4.36249	3.89937
orf19.1311	SPO75	Protein of unknown function	12.9851	11.9321	13.0869	13.6091	9.84215	11.2305	13.9648	11.0636
orf19.1313	CDR3	Transporter of the Pdr/Cdr family of the ATP-binding cassette superfamily; transports phospholipids out-to-in; expressed in opaque-phase cells; induced by macrophage interaction; fluconazole-repressed; Spider biofilm induced	12.7152	11.4527	11.9271	11.7115	11.0358	10.9852	10.9886	10.1401
orf19.1314	orf19.1314	Protein of unknown function; planktonic growth-induced gene	17.5169	21.3756	16.435	13.6529	22.9874	19.8764	19.8304	22.1281
orf19.1317	OSH3	Protein required for wild-type filamentation; has oxysterol binding protein domain and pleckstrin homology motif; overproducton suppresses cph1 homozygous null filamnetation defect; similar to S. cerevisiae Osh3p	43.7674	42.0282	41.848	41.9814	40.8151	37.0988	36.9205	37.8894
orf19.1318	orf19.1318	Protein of unknown function	6.91403	7.13906	10.8895	10.4829	10.2683	13.1181	13.6925	12.0793
orf19.132	orf19.132	Protein of unknown function	58.419	56.9447	64.7509	65.1504	65.4424	72.4903	75.6662	71.3451
orf19.1321	HWP1	Hyphal cell wall protein; host transglutaminase substrate; opaque-, a-specific, alpha-factor induced; at MTLa side of conjugation tube; virulence complicated by URA3 effects; Bcr1-repressed in RPMI a/a biofilms; Spider biofilm induced	1.01108	0.391494	2.26735	2.94474	0.205078	0.390821	0.182876	0.363248
orf19.1323	orf19.1323	Phosphorylated protein of unknown function; Hap43p-repressed gene	41.4781	42.3077	36.9002	35.7737	43.2775	35.8845	38.6963	35.8596
orf19.1324	RAD2	Ortholog of S. cerevisiae Rad2, a nucleotide excision repair nuclease; null mutant is extremely sensitive to UV irradiation; transcript induced by interaction with macrophages	23.131	21.2535	20.7586	21.5164	18.2826	17.7718	17.7487	17.9318
orf19.1325	ECM38	Putative gamma-glutamyltransferase; alkaline upregulated; Spider biofilm induced; possibly an essential gene, disruptants not obtained by UAU1 method	8.28663	8.77801	7.43795	8.03892	7.22578	7.19622	8.32506	7.97641
orf19.1326	orf19.1326	Protein of unknown function	5.57653	6.03387	1.93759	1.97288	3.48328	3.03585	2.60918	2.4081
orf19.1327	RBT1	Cell wall protein with similarity to Hwp1; required for virulence; predicted glycosylation; fluconazole, Tup1 repressed; farnesol, alpha factor, serum, hyphal and alkaline induced; Rfg1, Rim101-regulated	5.22293	4.60096	8.41579	10.0905	5.13072	4.87918	4.54505	5.12472
orf19.133	orf19.133	Protein of unknown function; induced by nitric oxide independent of Yhb1p	83.4652	59.4776	56.3492	63.0959	146.744	127.233	111.842	113.803
orf19.1330	orf19.1330	Protein of unknown function	1.54332	1.55048	1.9643	1.1107	2.20453	2.21854	2.0219	1.96175
orf19.1331	HSM3	Protein of unknown function	33.0019	33.0643	34.7189	33.2806	89.9118	88.196	107.911	107.211
orf19.1332	SNG4	Putative membrane transporter; Hap43-induced; inducd by Mnl1p under weak acid stress; shows Mob2-dependent hyphal regulation	19.0623	19.7637	23.6166	23.9242	21.4938	22.5841	24.2342	24.7191
orf19.1333	SNG3	Putative membrane transporter; Hap43p-induced gene; mutation confers hypersensitivity to toxic ergosterol analog; shows colony morphology-related gene regulation by Ssn6p	30.4555	30.9073	23.0062	22.1132	26.5522	25.2065	23.8164	24.6628
orf19.1334	orf19.1334	Protein of unknown function; repressed by alpha pheromone in SpiderM medium	6.75486	6.89201	9.51979	8.93134	5.71867	6.96823	7.10846	7.78533
orf19.1335	orf19.1335	Ortholog of S. cerevisiae Mtr4, an ATP-dependent 3'-5' RNA helicase of the DEAD-box family; Hap43-induced gene; Spider biofilm induced	57.244	57.8989	56.2866	55.4246	46.6605	47.9233	48.5606	44.1741
orf19.1336	PUP3	Putative beta 3 subunit of the 20S proteasome; macrophage/pseudohyphal-repressed	198.011	201.055	169.957	162.281	254.581	218.877	236.117	234.149
orf19.1336.2	orf19.1336.2	Protein of unknown function	89.1085	81.08	71.6875	72.3652	141.244	171.877	169.503	181.965
orf19.1338	orf19.1338	Protein of unknown function; possible COPI-coated vesicle, Golgi apparatus, ribosome localization; rat catheter biofilm repressed	85.4663	82.6971	85.0753	87.8448	122.824	123.549	126.629	123.36
orf19.1339	CPY1	Carboxypeptidase Y; transcript regulated at yeast-hypha transition or macrophage response; induced human neutrophils; regulated by Gcn2 and Gcn4; putative N-glycosylation	480.462	470.569	296.897	280.479	338.356	349.438	318.422	305.83
orf19.134	orf19.134	Protein of unknown function; overlaps retrotransposon Tca13; ciclopirox olamine induced	56.4158	59.3241	42.4944	47.8097	65.2276	62.2903	64.104	59.415
orf19.1340	orf19.1340	Putative aldose reductase; protein level decreases in stationary phase cultures; Spider biofilm repressed	20.4328	19.2468	33.035	29.34	27.3657	27.5503	28.4949	34.1919
orf19.1341	PRR2	Putative serine/threonine protein kinase; mutation confers resistance to 5-fluorocytosine (5-FC)	4.10113	3.26646	2.02612	3.28394	1.07656	0.229273	1.34693	1.8633
orf19.1342	SHM1	Mitochondrial serine hydroxymethyltransferase; complements the glycine auxotrophy of an S. cerevisiae shm1 null shm2 null gly1-1 triple mutant; protein present in exponential and stationary growth phase yeast cultures	278.77	280.493	292.763	300.99	190.597	202.783	204.815	210.211
orf19.1343	MED16	Putative RNA polymerase II mediator complex subunit; induced by nitric oxide	20.062	21.6921	22.2427	23.8406	24.0698	23.2204	26.188	24.6829
orf19.1344	orf19.1344	Protein of unknown function; fluconazole-induced; Spider biofilm induced	31.04	42.6025	21.4112	22.5995	32.2823	34.6015	33.5493	37.1031
orf19.1345	LIP8	Secreted lipase, member of a differentially expressed lipase gene family with possible roles in nutrition and/or in creating an acidic microenvironment; LIP5 and LIP8 are expressed at all stages of both mucosal and systemic infection	0	0	0	0	0	0	0	0
orf19.1348	orf19.1348	Protein of unknown function	0.19905	0.205529	0	0.331274	0.276848	0.492421	0.720053	0.624109
orf19.1349	orf19.1349	Protein of unknown function	1.20939	2.18533	1.01703	2.76755	2.94364	3.92683	3.49994	2.60699
orf19.135	EXO84	Predicted subunit of the exocyst complex, involved in exocytosis; localizes to a crescent on the surface of the hyphal tip	28.9677	30.1258	24.4854	24.5511	34.6168	36.365	37.9955	36.8721
orf19.1350	orf19.1350	Protein with a thioredoxin domain; predicted role in cell redox homeostasis; rat catheter and Spider biofilm induced	7.72493	10.4406	6.4434	6.32368	21.0953	19.8872	19.9928	18.7566
orf19.1351	orf19.1351	Protein of unknown function	10.2807	13.5581	21.5708	23.886	6.86626	8.05794	5.8178	6.86178
orf19.1352	TIM22	Mitochondrial inner membrane protein; predicted role in protein import; Hap43-repressed gene; flow model biofilm induced; Spider biofilm repressed	36.7878	37.8269	44.4711	40.9442	45.7297	44.1767	49.7379	48.9019
orf19.1353	orf19.1353	Protein of unknown function; repressed by yeast-hypha switch; Ras1-regulated; oral infection induced; mutants defective in damage to oral epithelium; flow model biofilm induced; Spider biofilm induced	92.1007	168.422	115.634	108.693	724.89	835.25	861.57	1085.95
orf19.1354	UCF1	Upregulated by cAMP in filamentous growth; induced in high iron, decreased upon yeast-hypha switch; downregulation correlates with clinical fluconazole resistance; Ras1-regulated; Hap43-repressed; flow model biofilm induced	773.684	758.211	364.216	356.553	2052.89	1749.07	1917.97	2000.85
orf19.1355	orf19.1355	Putative protein of unknown function; stationary phase enriched protein	60.7897	67.3921	65.0478	61.4165	78.7348	88.7714	94.2732	100.701
orf19.1356	orf19.1356	Protein of unknown function	9.20806	8.741	7.22288	6.28315	9.81181	13.1272	16.8698	13.2715
orf19.1357	FCY21	High affinity, high capacity, hypoxanthine-adenine-guanine-cytosine/H+ symporter; similar to S. cerevisiae Fcy2; mutation confers resistance to 5-fluorocytosine (5-FC); flow model biofilm induced	63.508	59.8032	56.9975	55.3024	63.3049	61.413	49.0929	52.307
orf19.1358	GCN4	bZIP transcription factor; amino acid control response; required for Efg1-dependent pseudohyphal induction by amino acid starvation, not by serum; human whole blood and PMN induced; required for biofilm formation; Spider biofilm induced	252.04	251.532	319.191	321.354	325.929	260.37	285.991	350.129
orf19.1359	orf19.1359	Protein of unknown function	32.4016	31.5127	41.1167	41.0219	32.8175	35.5329	34.5311	35.375
orf19.136	QDR3	Predicted membrane transporter, member of the drug:proton antiporter (12 spanner) (DHA1) family, major facilitator superfamily (MFS); Hap43p-repressed gene	8.69693	9.45085	7.88831	8.83623	8.87905	8.82219	9.4244	9.31936
orf19.1360	orf19.1360	Protein of unknown function	8.81158	11.2392	13.0765	12.6161	15.1392	18.7532	16.6877	13.3062
orf19.1360.1	orf19.1360.1	Putative adhesin-like protein	151.76	192.373	234.582	196.562	266.068	433.678	453.628	412.242
orf19.1361	TIM23	Protein involved in mitochondrial matrix protein import	84.637	83.2164	105.339	111.435	100.321	103.352	93.0076	104.602
orf19.1362	SMM1	Putative dihydrouridine synthase; Hap43-induced gene; rat catheter biofilm induced; Spider biofilm induced	14.517	14.4521	19.2118	19.0587	15.4851	21.0328	15.1058	14.9155
orf19.1363	orf19.1363	Putative protein of unknown function; Plc1-regulated; transcript induced by Mnl1 under weak acid stress; flow model, rat catheter, Spider biofilm induced	19.1092	22.0838	8.46752	7.95075	20.8024	25.1368	14.1444	9.1026
orf19.1364	orf19.1364	Ortholog of S. pombe Stm1 G-protein coupled receptor; PQ-loop domains; constitutive expression independent of MTL or white-opaque status; Hap43-repressed	21.7307	21.837	24.6377	23.5724	25.6365	32.1592	31.5843	31.6343
orf19.1365	orf19.1365	Putative monooxygenase; mutation confers hypersensitivity to toxic ergosterol analog; constitutive expression independent of MTL or white-opaque status	5.02142	5.23887	5.32239	4.43967	8.94828	7.82862	7.56864	7.91318
orf19.1366	orf19.1366	Protein of unknown function	0.542876	1.19116	1.31252	0.677621	0.943822	1.55284	1.62016	1.80854
orf19.1367	MTW1	Kinetochore component; amount of Nuf2p and Mtw1p protein detected at each centromere is consistent with a single kinetochore microtubule attachment site	6.86158	7.28536	7.23998	7.05645	11.2991	13.772	12.6919	17.2049
orf19.1367.1	orf19.1367.1	Protein of unknown function	361.394	383.09	362.014	286.575	950.877	1081.06	985.975	1117.78
orf19.1368	orf19.1368	Protein of unknown function; flow model biofilm induced; Spider biofilm induced	39.9714	37.1026	38.3957	37.4108	57.5427	62.2099	61.952	58.4971
orf19.1369	orf19.1369	Protein with predicted peptidase domains; Hap43-repressed gene	7.70886	8.18399	5.47834	5.51133	11.1371	11.5162	14.2574	12.8939
orf19.137	orf19.137	Putative transferase involved in phospholipid biosynthesis; induced by alpha pheromone in SpiderM medium	16.6315	18.5533	14.9755	13.4837	25.2145	26.5584	31.3779	31.6488
orf19.1370	orf19.1370	Protein of unknown function; expression regulated by white-opaque switch; repressed by alpha pheromone in SpiderM medium	0.0784021	0	0.0659316	0.195724	0.381658	0.339422	0.226892	0.676019
orf19.1371	orf19.1371	Protein of unknown function	28.9128	31.6523	26.8667	26.7925	37.5831	37.0864	42.4842	38.3057
orf19.1372	orf19.1372	Protein of unknown function; transcript regulated by Mig1 and Tup1	82.1888	87.2799	126.918	121.613	116.617	103.41	114.199	119.678
orf19.1373	INP51	Putative phosphatidylinositol-4,5-bisphosphate phosphatase; involved in maintenance of phosphoinositide levels; affects hyphal growth, virulence, cell integrity; interacts with Irs4p	8.10782	7.78467	7.67047	7.19934	6.32597	5.44245	6.31302	5.92912
orf19.1374	orf19.1374	Protein of unknown function	75.2795	69.0647	66.0039	64.7652	109.508	90.5712	90.3565	90.7378
orf19.1375	LEU42	Putative alpha-isopropylmalate synthase; fungal-specific; induced by human blood or polymorphonuclear cells; regulated by Gcn2 and Gcn4; stationary phase enriched protein; Spider biofilm induced	65.8654	56.9602	67.6038	61.1097	86.0208	81.8053	83.0643	84.1512
orf19.1376	orf19.1376	Protein of unknown function	93.0791	93.2899	94.2114	93.4872	106.714	112.015	119.681	113.001
orf19.1377	IPK2	Putative inositol polyphosphate multikinase; moderately induced at 42 deg	20.1914	22.5985	16.8015	19.7398	16.0049	15.326	17.0041	14.112
orf19.1378	SUP35	Translation factor eRF3; shows prion-like aggregation in some, not all, studies; partially complements S. cerevisiae sup35 mutant translation defect; species barrier with S. cerevisiae Sup35p prion; gene not regulated by yeast-hyphal switch	215.998	210.933	240.026	250.401	141.036	140.547	123.821	128.262
orf19.138	FIG1	S. cerevisiae Fig1 ortholog; an integral membrane protein required for mating; role in thigmotropism; transcript is opaque-specific and a-specific; activated by Cph1 or alpha pheromone	1.08574	0.498258	1.11595	1.30504	1.09063	1.4176	1.48377	1.70214
orf19.1381	orf19.1381	Ortholog of S. cerevisiae/S. pombe Lsb5; predicted role in actin cortical patch localization, actin filament organization, endocytosis; flow model biofilm induced; Spider biofilm repressed	63.422	54.8723	45.78	45.3426	44.6228	42.631	42.6179	44.3838
orf19.1382	YEA4	Putative uridine diphosphate-N-acetylglucosamine (UDP-GlcNAc) transporter; required for cell wall chitin synthesis; induced by alpha pheromone in SpiderM medium	18.2784	19.3738	16.7684	16.5353	20.8483	17.6419	17.0813	18.3438
orf19.1383	orf19.1383	Protein of unknown function; induced by alpha pheromone in SpiderM medium	15.9703	15.2818	18.1769	16.3541	15.9411	14.2398	14.2935	14.7308
orf19.1386	orf19.1386	Protein of unknown function	24.1194	25.9872	26.848	23.8521	27.6312	30.9869	26.4702	31.693
orf19.1387	orf19.1387	Protein of unknown function	59.3477	63.1053	49.784	49.4461	65.4181	55.4442	60.3245	59.6929
orf19.1388	orf19.1388	Putative 66S pre-ribosomal particle component; Hap43-induced; F-12/CO2 early biofilm induced	187.479	189.043	182.899	169.381	191.169	200.639	179.627	149.714
orf19.1389	orf19.1389	Protein of unknown function	549.977	480.126	429.028	419.469	907.499	762.479	730.999	745.925
orf19.139	TRA1	Subunit of the NuA4 histone acetyltransferase complex	21.4842	19.4551	26.3871	28.8725	15.3457	13.5739	16.7214	15.3486
orf19.1390	PMI1	Phosphomannose isomerase; cell wall biosynthesis enzyme; drug target; functional homolog of S. cerevisiae, E. coli phosphomannose isomerase; Gcn4-regulated; induced on adherence to polystyrene, phagocytosis; 3-AT, Spider biofilm repressed	83.011	82.7063	109.359	103.943	86.523	82.7778	88.6224	92.2262
orf19.1391	orf19.1391	Protein with similarity to trimeric LpxA-like enzymes; Hap43-repressed gene	1.97955	2.65717	3.32937	3.40433	3.16624	3.14232	3.29402	3.87922
orf19.1392	orf19.1392	Protein of unknown function	20.9061	18.9533	22.0819	21.484	21.6108	20.1734	22.483	24.137
orf19.1393	orf19.1393	Protein of unknown function	19.6469	14.6419	18.1149	21.0754	12.8725	14.9292	15.9764	12.8549
orf19.1394	orf19.1394	Putative protein of unknown function; mutant is viable; protein level decreases in stationary phase cultures; Spider biofilm induced	49.352	56.0274	61.5651	60.8489	63.0707	59.0207	59.8833	72.9818
orf19.1395	orf19.1395	Protein of unknown function	62.3811	63.908	44.9653	42.7156	57.558	61.1918	62.532	65.8819
orf19.1396	orf19.1396	Protein of unknown function	51.7703	52.6692	60.622	64.1844	32.4947	39.9343	37.6274	35.4335
orf19.1397	orf19.1397	Protein of unknown function	6.45979	7.15388	8.10624	7.8264	8.68198	8.7355	10.7275	10.1271
orf19.1400	orf19.1400	Protein of unknown function	23.5896	24.3267	22.186	22.1021	27.5823	27.6536	29.6198	29.0872
orf19.1401	EAP1	GPI-anchored cell wall adhesin; Efg1-regulated; mutant suppresses cell adhesion, filamentation, invasive growth defects of S. cerevisiae flo8 or flo11 mutant; biofilm induced; required for biofilm formation; Bcr1-repressed in a/a biofilms	16.948	9.29225	12.1364	13.1482	7.42443	8.40146	7.36967	9.16032
orf19.1402	CCT2	Chaperonin of the cytosolic TCP1 ring complex; protein present in exponential and stationary-phase yeast cells, but higher amounts in stationary phase; GlcNAc-induced protein	184.404	184.092	165.286	174.019	132.102	121.052	127.962	132.023
orf19.1403	orf19.1403	Protein of unknown function	27.1924	27.7039	34.2983	31.1739	21.5229	23.4452	21.3501	21.8155
orf19.1404	orf19.1404	Predicted tRNA dihydrouridine synthase; Spider biofilm induced	69.5884	70.2926	77.6811	70.3923	60.774	57.6147	50.0224	49.106
orf19.1405	PHO13	Putative 4-nitrophenylphosphatase; Hap43p-repressed gene; transcription is regulated upon yeast-hyphal switch	20.3469	20.5491	28.2886	24.6556	16.267	17.5438	17.2996	18.2774
orf19.1406	orf19.1406	Protein of unknown function	29.9152	30.8889	32.0049	24.3217	46.7933	43.9477	52.2169	50.6614
orf19.1409	VAC7	Ortholog of S. cerevisiae Vac7; integral vacuolar membrane protein involved in vacuole inheritance and morphology; mutants are viable	16.7544	14.9337	16.5921	18.6223	11.817	12.5154	13.5211	11.0803
orf19.1409.1	orf19.1409.1	Ribosomal 60S subunit protein L22B; Spider biofilm repressed	1045.17	1182.21	1186.77	1202.25	653.906	694.744	666.962	651.749
orf19.1409.2	orf19.1409.2	Protein of unknown function; Spider biofilm induced	20.1313	19.3864	26.8412	24.3903	25.4608	30.2554	32.2237	28.4533
orf19.1409.3	orf19.1409.3	Protein of unknown function; Spider biofilm induced	0	0.93505	0.761536	0.753563	0.629758	0.560066	1.96552	0.709844
orf19.1411	orf19.1411	Putative cytochrome P450; Hap43-repressed gene	2.99328	1.98359	2.32932	2.41647	1.86411	2.29332	2.06864	2.62647
orf19.1412	orf19.1412	Protein of unknown function	85.7188	87.8063	121.952	121.43	106.054	124.681	111.4	117.763
orf19.1413	YFH1	Frataxin; may be required for iron storage or delivery; role in oxidative stress resistance; transcript regulated by Nrg1, repressed if iron absent induced by macrophage interaction; Hap43-repressed gene	36.7008	45.2045	44.3258	44.4055	60.4363	56.2402	60.748	56.4268
orf19.1414	orf19.1414	Protein of unknown function; transcript is upregulated in an RHE model of oral candidiasis; Hap43-repressed	83.0692	83.775	118.672	117.374	85.2835	92.393	99.1524	97.0705
orf19.1415	FRE10	Major cell-surface ferric reductase under low-iron conditions; 7 transmembrane regions and a secretion signal predicted; Tup1, Rim101, Ssn6, Hog1, caspofungin repressed; ciclopirox olamine induced; rat catheter biofilm induced	297.951	283.219	170.426	174.62	269.546	236.743	228.021	210.12
orf19.1416	COX11	Cytochrome oxidase assembly protein; transcript regulated by Nrg1; protein repressed during the mating process; Hap43-repressed gene; rat catheter biofilm induced	38.0432	37.003	37.8877	37.2682	58.0676	46.8352	61.7824	62.8171
orf19.1417	orf19.1417	Protein of unknown function	8.456	11.8655	12.3987	12.6297	16.4352	23.3326	21.8046	27.533
orf19.1418	SEC15	Predicted exocyst subunit; cellular bud tip-associated protein; ortholog of <iS. cerevisiae</i SEC15	27.9885	29.0656	30.6383	30.9868	31.7313	26.8767	30.8978	28.9789
orf19.1420	orf19.1420	Protein of unknown function	28.0049	28.4061	25.005	24.5376	34.0816	32.5514	35.5167	31.0555
orf19.1421	orf19.1421	Protein of unknown function	19.8115	21.3268	20.4414	20.4612	19.0538	16.6846	15.7566	15.6396
orf19.1422	FZO1	Mitochondrial biogenesis protein; rat catheter and Spider biofilm induced	28.8925	29.7854	29.4693	31.8238	22.5146	25.1337	27.2651	22.378
orf19.1424	orf19.1424	Predicted membrane transporter, member of the oxalate:formate antiporter (OFA) family, major facilitator superfamily (MFS)	10.2619	11.2218	10.3046	11.0614	7.73857	8.22113	7.39304	8.00994
orf19.1426	orf19.1426	Ortholog of S. cerevisiae Skg6; localizes to the cell cortex, cell bud neck, cell bud tip, incipient cellular bud site, and is membrane-bound; Spider biofilm induced	41.9128	37.4501	45.3336	47.4783	31.632	31.604	29.8106	29.9863
orf19.1427	orf19.1427	Putative transporter; fungal-specific; Spider biofilm induced	7.32177	9.70478	10.0436	8.94463	8.37788	8.76747	10.1812	9.15837
orf19.1428	DUO1	Subunit of the Dam1 (DASH) complex, which acts in chromosome segregation by coupling kinetochores to spindle microtubules	17.0767	26.0369	25.0974	28.2876	17.0919	16.9771	18.7055	14.6368
orf19.1429	SOH1	Subunit of the RNA polymerase II mediator complex; involved in control of cytokinesis, morphogenesis, biofilm formation, virulence; cell-cycle regulated periodic mRNA expression	15.8487	13.2522	24.6115	21.9265	21.5021	26.5191	25.1134	25.8371
orf19.1430	orf19.1430	Protein of unknown function	2.01412	2.76233	2.81027	2.25641	2.63112	3.05692	2.98528	1.91071
orf19.1433	orf19.1433	Protein of unknown function; Hap43-repressed; colony morphology-related gene regulation by Ssn6; Spider biofilm induced	36.4762	38.3521	26.3273	26.2598	62.3288	54.1678	53.3231	55.0931
orf19.1434	orf19.1434	Protein of unknown function	15.4205	15.7143	14.6346	16.1029	17.2889	14.69	15.5803	17.8285
orf19.1435	TEF1	Translation elongation factor 1-alpha; at cell surface; binds human plasminogen; macrophage/pseudohyphal-induced; induced in RHE model of oral candidiasis, in clinical oral candidiasis isolates; possibly essential; Spider biofilm repressed	840.931	693.007	659.535	757.745	508.149	394.007	351.566	310.342
orf19.1438	orf19.1438	Protein with homology to NADH dehydrogenase; regulated by Sef1p-, Sfu1p-, and Hap43p	5.47986	5.8033	4.31284	5.6123	4.98338	5.95264	6.20107	4.84614
orf19.1439	IPK1	Ortholog of S. cerevisiae/S. pombe Ipk1; an inositol pentakisphosphate 2-kinase, a nuclear protein required for synthesis of 1,2,3,4,5,6-hexakisphosphate; Spider biofilm induced	14.6196	14.4767	18.6428	15.2567	22.6252	26.0133	26.8329	28.884
orf19.144	SNU114	Protein similar to S. cerevisiae Snu114p, which is an RNA helicase involved in pre-mRNA splicing; likely to be essential for growth, based on an insertional mutagenesis strategy	11.3942	12.2922	14.8118	15.1202	17.4936	19.7772	21.5911	22.9016
orf19.1440	orf19.1440	Protein of unknown function	29.2589	30.3488	34.574	31.2564	41.8371	47.3945	46.5772	43.3292
orf19.1440.1	orf19.1440.1	Protein of unknown function	10.0483	31.1259	19.0125	18.8134	68.131	48.1623	56.341	61.0423
orf19.1440.2	orf19.1440.2	Protein of unknown function	10.5041	11.1787	10.0255	10.7249	14.251	14.4674	14.1735	17.3262
orf19.1441	orf19.1441	Protein of unknown function	50.2448	47.2055	46.9508	47.9511	45.1626	41.8632	34.217	36.6483
orf19.1442	PLB4.5	Phospholipase B; Hog1-induced; regulated by Ssn6; putative GPI-anchor; repressed during cell wall regeneration; clade-associated gene expression; Hap43-induced; rat catheter and Spider biofilm repressed	129.307	132.007	90.002	88.8939	99.8529	92.027	87.3539	89.2289
orf19.1444	orf19.1444	Protein of unknown function	68.1507	67.2821	69.9533	68.3917	59.5658	68.8099	63.5684	62.7938
orf19.1445	ESC4	Protein similar to S. cerevisiae Esc4; a protein that represses transposition; transposon mutation affects filamentation; rat catheter biofilm repressed	8.68284	9.96161	11.7865	12.5328	8.29327	8.66828	9.92702	10.0621
orf19.1446	CLB2	B-type mitotic cyclin (cyclin-dependent protein kinase regulatory subunit); essential; required for wild-type mitotic exit; role in cell polarization; interacts with catalytic subunit Cdk1; Spider biofilm repressed	38.3961	39.4423	48.6954	48.3048	26.3656	29.1333	27.6269	29.0859
orf19.1447	orf19.1447	Protein of unknown function	6.70582	6.77672	10.1464	13.1376	4.30136	5.52833	3.57385	4.37774
orf19.1448	APT1	Adenine phosphoribosyltransferase; flucytosine induced; repressed by nitric oxide; protein level decreased in stationary phase yeast cultures	167.279	184.285	220.801	200.507	208.366	210.306	202.275	192.121
orf19.1448.1	orf19.1448.1	Protein of unknown function	94.7624	108.115	96.4147	84.6965	169.225	200.603	213.72	224.446
orf19.1449	orf19.1449	Protein of unknown function; induced in azole-resistant strain that overexpresses MDR1; protein present in exponential and stationary growth phase yeast cultures; Spider biofilm induced	13.4988	11.5657	4.95129	4.30195	23.1689	12.434	12.9871	15.309
orf19.145	RPB4	Protein similar to S. cerevisiae Rpb4p, which is a component of RNA polymerase II; transposon mutation affects filamentous growth	51.4457	51.8685	49.9057	45.8775	96.6411	102.168	105.611	105.66
orf19.1450	orf19.1450	Protein of unknown function	0.317429	0.0819401	0.266939	0.264144	0.275934	0.147239	0.114828	0.186615
orf19.1451	SRB9	Subunit of the RNA polymerase II mediator complex; transposon mutation affects filamentous growth; suppresses S. cerevisiae diploid filamentous (flo8, ste7, ste12, tec1) or haploid invasive (flo8) mutant growth defects	17.0223	14.725	17.0569	16.9146	13.3389	13.3254	13.9723	13.8271
orf19.1453	SPT5	Protein similar to S. cerevisiae Spt5p transcription elongation factor; transposon mutation affects filamentous growth	134.24	121.401	115.767	120.204	86.32	78.8324	69.3665	74.3238
orf19.1456	orf19.1456	Protein of unknown function	0	0	0.782582	1.03252	0.215721	0.575544	1.34656	1.45892
orf19.1457	orf19.1457	Putative RNA polymerase transcription factor TFIIH core component; possibly an essential gene, disruptants not obtained by UAU1 method	58.6862	58.6135	51.2029	53.1611	40.8443	35.1077	35.3428	34.0332
orf19.1458	orf19.1458	Protein of unknown function	32.647	28.9394	41.4404	45.0217	39.9096	42.8583	43.1544	42.6512
orf19.1459	PPE1	Protein similar to S. cerevisiae Ppe1p; shows genetic interaction with some genes involved in diploid filamentous growth and haploid invasive growth in S. cerevisiae	17.6522	15.9846	16.9651	17.487	18.9008	18.7586	20.2717	20.5357
orf19.1460	orf19.1460	Putative glutamine-dependent NAD synthetase, involved in NAD salvage pathway	102.657	93.2523	81.2524	82.1514	74.3384	70.7891	71.2291	64.9973
orf19.1461	orf19.1461	S. pombe ortholog SPCC576.01c is a predicted sulfonate dioxygenase; possibly transcriptionally regulated upon hyphal formation; Spider biofilm induced	32.0693	34.0942	25.0008	22.116	31.7283	28.5418	28.913	26.4262
orf19.1462	SMP2	Putative Mg2+-dependent phosphatidate phosphatase; transcript regulated by Nrg1	106.819	105.087	53.636	57.4455	69.2406	56.4466	52.0397	51.8435
orf19.1464	BMT5	Putative beta-mannosyltransferase involved in beta-1,2-mannosylation of phospholipomannan; 9-member family includes Bmt1, Bmt2, Bmt3, and Bmtp with roles in mannosylation of cell wall phosphopeptidomannan; Spider biofilm induced	22.6037	21.6775	23.275	20.964	23.1407	21.3589	23.0621	23.1762
orf19.1465	orf19.1465	Protein of unknown function	13.5386	11.8612	11.9602	11.4936	16.0721	18.1841	18.106	17.5801
orf19.1466	REX2	Putative 3'-5' RNA exonuclease with a predicted role in 3'-end processing of U4 and U5 snRNAs, 5S and 5.8S rRNAs; rat catheter biofilm induced	64.1625	63.9742	46.911	40.4568	94.8368	96.0691	84.1478	84.5153
orf19.1467	COX13	Cytochrome c oxidase; flucytosine induced; repressed by nitric oxide	1656.37	1775.4	1311.82	1146.96	2540.53	2310.19	2205.81	2089.51
orf19.1468	CDC55	Protein of unknown function	98.8197	90.2482	91.2467	92.0639	97.9553	94.0934	98.6338	95.8281
orf19.147	YAK1	Predicted serine-threonine protein kinase; involved in hyphal growth regulation and biofilm formation; flow model biofilm induced; induced in core caspofungin response	13.7891	11.8509	12.8664	12.8205	22.6718	26.1387	31.3217	27.7405
orf19.1470	RPS26A	Ribosomal protein; regulated by Nrg1, Tup1; repressed upon phagocytosis by murine macrophage; alternatively spliced intron in 5'-UTR; Spider biofilm repressed	41.2778	55.0874	102.587	81.9771	145.241	146.098	103.215	125.58
orf19.1471	COX4	Putative cytochrome c oxidase subunit IV; Mig1-regulated; macrophage/pseudohyphal-induced gene; macrophage-induced protein; repressed by nitric oxide; 5'-UTR intron; Hap43-repressed	3.86762	4.07903	4.79064	5.2201	11.8462	13.1482	11.6348	11.0601
orf19.1473	orf19.1473	2-hydroxyacid dehydrogenase domain-containing protein; Hap43-repressed gene; induced by alpha pheromone in SpiderM medium	6.32291	5.92836	6.84513	6.59203	8.84473	8.13562	7.20361	5.52596
orf19.1474	SLA1	Protein required for assembly of the cortical actin cytoskeleton; contains three SH3 domains; transcription is regulated by Nrg1 and Mig1; flow model biofilm repressed	102.695	92.8203	89.9054	94.0487	55.8584	59.9136	61.2465	54.9742
orf19.1476	orf19.1476	Protein of unknown function	0.75273	0.518153	0.928403	0.835166	0.977136	0.713823	0.798735	1.06206
orf19.1477	orf19.1477	Protein of unknown function; possible ER protein; Hap43p-repressed; Spider biofilm induced	22.1217	21.768	34.0262	33.9846	55.8162	60.6897	67.7812	73.1407
orf19.1478	STT3	Putative oligosaccharyltransferase complex component; flow model and rat catheter biofilm repressed	93.4103	96.2938	98.5293	104.222	94.5771	80.4284	83.3174	89.9126
orf19.1479	orf19.1479	Ortholog of the mitochondria localized S. cerevisiae Pib2 protein of unknown function; has a FYVE zinc finger domain; Spider biofilm induced	26.0169	24.4882	23.8134	25.7621	23.1098	24.452	24.7617	22.3974
orf19.1480	orf19.1480	Putative succinate dehydrogenase; enzyme of citric acid cycle; repressed by nitric oxide; Efg1, Hap43 repressed	174.674	200.692	308.347	322.381	185.764	249.659	221.86	247.612
orf19.1481	HAP42	Predicted transcription factor; possibly an essential gene, disruptants not obtained by UAU1 method	31.6263	30.8159	26.5958	27.0587	34.1521	36.0546	39.5789	37.2077
orf19.1482	HSK3	Subunit of the Dam1 (DASH) complex, which acts in chromosome segregation by coupling kinetochores to spindle microtubules; expression regulated during planktonic growth	22.1418	25.3565	20.5384	24.5667	27.3429	31.9524	32.2365	34.1862
orf19.1483	orf19.1483	Protein of unknown function	37.8632	37.4801	40.7878	42.4439	93.8993	133.245	156.66	139.935
orf19.1484	orf19.1484	Ortholog of S, cerevisiae Spc24; a component of the conserved kinetochore-associated Ndc80 complex involved in chromosome segregation, spindle checkpoint activity and kinetochore clustering; Hap43-induced gene	2.84362	4.79576	3.66669	2.60291	13.0516	13.3073	16.9387	14.1913
orf19.1485	orf19.1485	Mitochondrial ribosomal protein of the large subunit; rat catheter biofilm induced	167.317	171.701	164.347	141.228	314.376	376.916	406.07	369.675
orf19.1486	orf19.1486	Protein with a life-span regulatory factor domain; regulated by Sef1, Sfu1, and Hap43; flow model biofilm induced; Spider biofilm induced	12.0892	5.80215	5.23449	11.497	51.7048	52.5197	66.9613	62.6149
orf19.1488	orf19.1488	Protein of unknown function	4.80644	5.11327	6.55283	6.84783	9.01464	11.8004	11.9075	12.2161
orf19.149	orf19.149	Protein of unknown function; transcript detected on high-resolution tiling arrays	1.2249	0.948575	0.515034	0.764463	2.34251	3.03022	2.88015	4.56071
orf19.1490	MSB2	Mucin family adhesin-like protein; cell wall damage sensor; required for Cek1 phosphorylation by cell wall stress; Rim101-repressed; activation releases extracellular domain into medium; Spider biofilm induced	45.2	34.8532	54.4245	60.5884	26.5905	25.1142	26.0713	22.1175
orf19.1490.1	orf19.1490.1	Predicted ORF in retrotransposon Tca16 with similarity to the Gag-Pol region of retrotransposons; added to Assembly 21 based on comparative genome analysis; overlaps orf19.1490.2, which is annotated as blocked reading frame	17.2842	6.70739	4.92736	5.30137	7.99922	2.0937	9.21197	0.738488
orf19.1491	orf19.1491	Protein of unknown function	15.2016	15.7501	18.645	17.8182	22.1602	25.8975	28.5843	25.5697
orf19.1492	PRP39	Putative component of the U1 snRNP; involved in splicing; Hap43-induced gene; Spider biofilm induced	10.8526	11.5454	11.4495	11.5486	11.0692	14.4409	15.5132	14.4876
orf19.1493	RAD7	Protein similar to S. cerevisiae Rad7p, which is a subunit of the Nucleotide Excision Repair Factor 4; induced under hydroxyurea treatment	48.6544	51.2374	44.5469	45.5054	41.7829	35.9618	38.1635	39.1887
orf19.1494	RAD23	S. cerevisiae Rad23 ortholog; binds damaged DNA; Spider biofilm repressed	223.198	203.06	204.291	204.374	213.423	190.258	184.658	177.418
orf19.1495	orf19.1495	Protein of unknown function	18.6223	24.8838	27.0216	25.6753	39.6129	49.3999	62.1477	61.8953
orf19.1496	orf19.1496	Putative transcription factor with zinc finger DNA-binding motif; Hap43p-repressed gene	6.22384	6.24954	8.11492	9.55043	7.46515	8.29878	7.80775	9.08587
orf19.1497	ZCF6	Putative transcription factor with zinc cluster DNA-binding motif	3.85811	5.0939	5.90383	6.42096	5.93783	5.75012	6.45203	7.48619
orf19.1499	CTF1	Putative zinc-finger transcription factor, similar to A. nidulans FarA and FarB; activates genes required for fatty acid degradation; induced by oleate; null mutant displays carbon source utilization defects and slightly reduced virulence	11.3557	10.6237	11.7088	13.1661	9.22996	10.2662	10.6752	9.92182
orf19.150	TIM17	Predicted component of the Translocase of the Inner Mitochondrial membrane (TIM23 complex), involved in protein import into mitochondria	126.098	107.029	126.751	118.551	185.822	192.433	200.37	187.643
orf19.1500	orf19.1500	Protein of unknown function	34.8603	34.9436	34.0043	36.069	48.1144	48.0973	49.8808	49.2544
orf19.1502	orf19.1502	Protein of unknown function	10.8272	10.8565	14.7891	15.1551	15.1895	17.0309	18.1571	22.076
orf19.1504	orf19.1504	Putative patatin-like phospholipase; fungal-specific (no human or murine homolog)	52.0491	53.7999	44.3015	42.4206	87.2527	82.2853	93.2382	94.5379
orf19.1505	orf19.1505	Protein of unknown function	29.5729	34.3143	40.009	40.8672	67.5672	82.7239	81.5685	85.0897
orf19.1506	orf19.1506	Protein of unknown function	0	0	0	0	0	0	0.700557	0
orf19.1507	AMN1	Putative negative regulator of exit from mitosis; Plc1-regulated; rat catheter biofilm induced	5.78283	5.0705	7.92889	8.09876	7.88422	9.45307	9.59834	10.6109
orf19.1508	orf19.1508	Protein of unknown function; transcript detected on high-resolution tiling arrays	5.3701	3.11315	9.74508	12.6353	20.1554	18.9918	11.5217	23.2756
orf19.1509	ROD1	Protein similar to S. cerevisiae Rod1;a membrane protein with a role in drug tolerance; repressed by Rgt1; mutant is viable	45.7089	49.8985	42.9809	40.7929	31.3196	40.3996	38.0547	32.461
orf19.151	TPO5	Putative polyamine transporter; mutation confers hypersensitivity to toxic ergosterol analog; hyphal induced; macrophage induced	11.0796	12.2091	15.3535	14.4988	11.6197	14.2205	12.9506	12.7238
orf19.1510	SRD1	Sur7 family protein with PalI-like domains; not required for stress responses; mutant is viable	8.09283	7.73211	9.91188	9.55662	7.12249	8.05804	7.96873	8.42309
orf19.1513	FAB1	Phosphatidylinositol 3-phosphate 5-kinase; required for hyphal growth on solid media, and for wild-type vacuolar morphology and acidification; not required for wild-type virulence in mouse systemic infection or for adherence to HeLa cells	19.3496	18.6242	18.5867	19.2346	22.4199	20.2248	23.2504	23.0536
orf19.1514	orf19.1514	Protein of unknown function	87.379	85.7206	99.3408	100.069	90.6101	97.9684	103.481	111.932
orf19.1515	CHT4	Chitinase; similar to S. cerevisiae sporulation-specific Cts2p; functionally complements A. gossypii cts2 mutant sporulation defect; homozygous null mutation causes no obvious defects; transcription decreases upon yeast-to-hyphal switch	7.49929	9.14148	10.3342	9.57734	11.8066	12.6855	13.8656	13.7979
orf19.1516	orf19.1516	Protein of unknown function	38.2467	41.0635	32.4865	33.5061	33.216	30.0093	32.2134	31.059
orf19.1517	ARO3	3-deoxy-D-arabinoheptulosonate-7-phosphate synthase; aromatic amino acid synthesis; GCN-regulated; feedback-inhibited by phe if expressed in S. cerevisiae; decreased in stationary phase; flow model biofilm repressed	137.54	139.771	269.233	277.277	178.91	154.191	174.866	188.818
orf19.1519	orf19.1519	Protein of unknown function; Hap43-repressed gene	18.6325	17.387	18.2241	19.3678	17.5065	15.1907	16.9002	14.8699
orf19.1522	orf19.1522	Protein of unknown function	16.6526	17.3239	25.5684	24.7277	13.7574	15.5389	17.4831	16.3084
orf19.1523	FMO1	Putative oxidoreductase; mutation confers hypersensitivity to toxic ergosterol analog, and to amphotericin B	3.2375	3.29298	2.76319	3.41782	3.72999	4.72179	4.36996	3.37104
orf19.1524	SPR3	Septin; mutant has no obvious phenotype	0.112673	0.23268	0.331629	0.281277	0.666019	0.661998	0.366829	0.264959
orf19.1525	orf19.1525	Protein of unknown function	22.5474	26.9486	37.9805	38.6975	15.353	22.7969	28.6209	30.0589
orf19.1526	SNF2	Protein involved in transcriptional regulation; ortholog of S. cerevisiae Snf2p, which is the catalytic subunit of the SWI/SNF chromatin remodeling complex; interacts with Swi1p; SWI/SNF complex is essential for hyphal growth and virulence	36.8765	35.4555	40.6398	44.7756	25.3098	23.8597	28.5253	27.4739
orf19.1527	orf19.1527	Protein of unknown function; Spider biofilm induced	20.9896	25.538	18.7753	17.8	29.3793	32.9081	39.8505	37.936
orf19.1528	orf19.1528	Putative mitochondrial RNA polymerase specificity factor; possibly an essential gene, disruptants not obtained by UAU1 method	54.2272	53.9996	65.8875	62.7354	81.4161	86.7681	83.0731	81.2314
orf19.1529	orf19.1529	Protein of unknown function; macrophage-induced gene	1.82406	0.986557	1.68001	2.0961	2.59739	2.20251	1.57106	1.90641
orf19.1530	orf19.1530	Protein of unknown function	0	0	0	0	0.470117	0.278728	0.32606	0.176634
orf19.1531	orf19.1531	Protein of unknown function	15.8703	15.8238	14.8664	13.9466	20.257	19.4529	22.5487	23.4179
orf19.1532	SAM37	Protein of the mitochondrial outer membrane, component of the Sorting and Assembly Machinery (SAM) involved in insertion of proteins into the outer membrane; mutants show loss of mtDNA	12.8095	13.9311	13.6858	11.3146	16.5018	19.1238	20.4342	22.0982
orf19.1533	orf19.1533	Possible vacuolar protein; Hap43-induced gene	28.5191	31.317	47.2806	43.207	38.1232	42.2193	39.5963	43.2552
orf19.1534	orf19.1534	Ortholog of S. cerevisiae Zrt3, vacuolar membrane zinc transporter; predicted Kex2 substrate; induced in oralpharyngeal candidasis; flow model biofilm induced; Spider biofilm induced	16.7969	18.0745	18.103	18.4222	26.3156	24.3388	29.1936	31.5539
orf19.1535	orf19.1535	Protein of unknown function; Hap43-induced gene	11.4632	10.1631	12.769	17.23	14.3992	15.7752	15.4146	15.854
orf19.1536	orf19.1536	Putative vacuolar transporter; Hap43-induced; required for normal filamentous growth; mRNA binds She3 and is localized to hyphal tips	36.4035	39.5168	52.712	50.4424	47.3731	53.6816	58.5779	62.233
orf19.1538	TLG2	Putative syntaxin-like t-SNARE; macrophage/pseudohyphal-repressed	7.64648	9.54911	12.426	11.2211	18.7551	21.3447	21.3436	20.8567
orf19.1539	orf19.1539	Protein of unknown function; F-12/CO2 early biofilm induced	0.488312	0.315128	0.461972	0.457135	0.594271	0.679507	0.485772	0.765536
orf19.154	orf19.154	Putative ortholog of S. cerevisiae Utp30; a U3-containing 90S preribosome complex protein; Hap43-induced; Spider biofilm induced	8.71446	11.0746	11.8381	10.8774	22.5161	25.4139	30.1176	26.2202
orf19.1541	orf19.1541	Protein with a globin-like domain; repressed by alpha pheromone in SpiderM medium; Spider biofilm induced	0.450576	0.775402	1.05778	1.20293	1.22725	2.22932	2.06458	1.94254
orf19.1542	HEX3	Protein similar to S. cerevisiae Hex3p, which is involved in DNA damage response; transposon mutation affects filamentous growth	36.0966	33.8832	31.6315	34.1334	34.4303	31.0259	32.6741	31.1563
orf19.1543	OPI1	Leucine zipper transcription factor; repressor of INO1 involved in inositol biosynthesis; functional homolog of S. cerevisiae Opi1; has putative Opi1-Sin3 interaction domain; interacts with ScSin3, but not CaSin3	24.733	25.5866	24.2787	26.5287	19.0311	22.683	20.9898	20.2718
orf19.1544	orf19.1544	Putative cis-golgi localized protein involved in ER to Golgi transport; Spider biofilm repressed	58.5929	52.8672	56.2777	60.9868	74.9854	75.0165	68.5536	66.674
orf19.1545	orf19.1545	Protein of unknown function	137.271	126.867	141.455	135.535	201.433	232.147	234.151	208.791
orf19.1546	orf19.1546	Membrane-localized protein of unknown function	49.1073	57.975	69.4732	58.5828	85.3478	97.1249	100.272	99.6257
orf19.1547	orf19.1547	Protein of unknown function	8.01516	8.86718	7.86366	7.46372	13.5367	11.9206	14.3591	14.3606
orf19.1548	orf19.1548	Protein of unknown function	31.2606	28.1813	25.7828	27.3138	37.2011	32.8671	31.9187	34.3977
orf19.1549	orf19.1549	Plasma membrane-associated protein identified in detergent-resistant membrane fraction (possible lipid raft component); repressed by nitric oxide; predicted transmembrane helix	69.6891	66.0356	70.0335	67.6676	130.398	128.12	137.591	134.536
orf19.155	URE2	Functional homolog of S. cerevisiae Ure2p, which is a regulator of nitrogen utilization, and which also has an infectious prion form called [URE3]; forms [URE3] prion when expressed in S. cerevisiae	16.9706	15.1934	18.3104	19.632	19.4083	19.8049	21.7443	19.4927
orf19.1551	orf19.1551	Predicted protein of unknown function; overlaps CPR3/orf19.1552	0	1.31208e-192	0	0	0.498322	0.29545	0.345735	0.187262
orf19.1552	CPR3	Putative peptidyl-prolyl cis-trans isomerase; macrophage-induced protein; protein levels decrease in stationary phase yeast cultures; predicted mitochondrial localization; overlaps orf19.1551	982.943	1009.63	766.905	793.978	1206.15	1037.63	1060.36	1011.28
orf19.1553	ENT3	Putative epsin; induced during the mating process; transcript is upregulated in an RHE model of oral candidiasis	188.935	186.021	170.944	171.509	154.205	155.829	150.261	144.376
orf19.1555	SAC3	Putative nuclear pore-associated protein, required for small ribosomal subunit biogenesis; possibly an essential gene, disruptants not obtained by UAU1 method	16.2199	15.3356	16.6855	16.8955	13.5704	14.6301	14.6477	14.8281
orf19.1557	orf19.1557	Protein of unknown function	14.3513	12.916	8.96988	9.68287	9.37329	11.2146	12.9086	9.57717
orf19.1559	HOM2	Aspartate-semialdehyde dehydrogenase; forms a homodimer; conserved in bacteria, archaea, and fungi but not in mammals; ketoconazole-repressed; protein present in exponential and stationary growth phase yeast cultures; GlcNAc-induced protein	298.787	285.293	349.452	361.226	241.889	204.85	188.306	196.675
orf19.156	FGR51	Protein lacking an ortholog in S. cerevisiae; transposon mutation affects filamentous growth; Hap43p-repressed gene	34.3161	36.0315	27.8059	28.5551	38.912	35.3329	38.3523	35.8033
orf19.1560	POB3	Protein involved in chromatin assembly and disassembly; ortholog of S. cerevisiae Pob3; transposon mutation affects filamentous growth; rat catheter biofilm repressed	171.815	167.541	156.503	168.655	144.739	116.485	118.709	111.349
orf19.1562	orf19.1562	Protein of unknown function; flow model biofilm induced; Spider biofilm induced; repressed by alpha pheromone in SpiderM medium	28.1179	31.1156	23.5457	23.7928	20.0488	22.0125	19.828	19.9945
orf19.1563	ECM3	Protein of unknown function	40.5669	37.4241	28.0186	31.4668	20.402	23.5765	20.6611	18.9947
orf19.1564	orf19.1564	Plasma membrane-localized protein of unknown function	189.778	173.373	142.622	131.849	265.871	239.827	237.061	250.219
orf19.1565	orf19.1565	Protein of unknown function	44.7423	45.7781	51.4645	49.1433	46.8121	39.011	42.2055	43.6478
orf19.1566	UTP21	Putative U3 snoRNP protein; Hap43-induce; physically interacts with TAP-tagged Nop1; Spider biofilm induced	73.0111	70.9878	65.4393	65.2523	47.303	43.8336	39.7189	34.1745
orf19.1567	orf19.1567	Protein of unknown function	15.7266	16.9909	16.6518	16.65	18.8797	17.9451	18.892	19.174
orf19.1569	UTP22	Putative U3 snoRNP protein; Ssr1-induced; repressed by prostaglandins; heterozygous null mutant is resistant to parnafungin	60.1547	59.6434	66.6081	65.4867	33.968	37.9308	35.665	30.7131
orf19.1570	ERG7	2,3-epoxysqualene-lanosterol cyclase (lanosterol synthase), conversion of 2,3-oxidosqualene to lanosterol in sterol biosynthesis; fluconazole-induced; possibly essential, disruptants not obtained by UAU1 method; rat catheter biofilm induced	52.5533	43.9625	37.8325	43.553	62.3549	64.6343	61.6341	58.5292
orf19.1571	ATO7	Putative fungal-specific transmembrane protein	0	0	0.104078	0	0.172136	0	0.0895414	0
orf19.1573	orf19.1573	Protein of unknown function	29.7158	25.6807	21.8973	23.8168	21.9251	14.8679	13.6154	10.5355
orf19.1574	orf19.1574	Putative TFIID subunit involved in RNA polymerase II transcription initiation; possibly an essential gene, disruptants not obtained by UAU1 method	36.5629	35.2725	32.1169	31.6112	31.5993	31.5018	27.9847	28.8836
orf19.1575	PRS1	Phosphoribosylpyrophosphate synthetase; enzyme of purine, pyrimidine, histidine, and tryptophan biosynthesis; essential; flucytosine induced; macrophage/pseudohyphal-induced	101.037	100.286	85.4283	84.8766	88.6411	82.5249	71.2621	70.1063
orf19.1576	orf19.1576	Protein of unknown function	4.80604	7.11031	3.3056	8.31525	9.8677	8.3317	6.44202	6.95505
orf19.1577	orf19.1577	Protein of unknown function	0.50958	0.591937	1.28558	1.27212	0.575857	0.551525	0.783436	0.4993
orf19.1578	orf19.1578	Ortholog of S. cereviaie Rrp5, an RNA binding protein involved in synthesis of 18S and 5.8S rRNAs; Hap43-induced gene	60.364	58.3926	67.155	66.7424	55.7868	51.159	51.4212	45.3029
orf19.158	orf19.158	Ortholog of S. cerevisiae Apd1; required for normal localization of actin patches and normal tolerance of sodium ions and hydrogen peroxide; Hap43-induced; Spider biofilm induced	33.1756	49.566	35.599	32.041	90.7027	92.3392	103.8	121.321
orf19.1580	orf19.1580	Protein of unknown function; Spider biofilm induced	2.04184	1.67324	1.66248	1.78	2.41166	2.2662	2.22755	2.41349
orf19.1581	orf19.1581	Planktonic growth-induced gene	0	0.567261	0	0.45716	0.382052	0.679544	0	3.4451
orf19.1582	orf19.1582	Predicted membrane transporter; member of the drug:proton antiporter (12 spanner) (DHA1) family, major facilitator superfamily (MFS); mRNA binds She3	5.30814	6.1914	4.50517	4.3353	2.52929	2.97892	2.59582	2.08042
orf19.1584	orf19.1584	Predicted MFS membrane transporter; monocarboxylate porter family member; colony morphology-related gene regulation by Ssn6; flow model biofilm induced; Spider biofilm induced	22.5122	21.4343	22.2395	25.5167	14.9634	15.3593	14.47	13.597
orf19.1585	ZRT2	Zinc transporter; ciclopirox olamine, fluconazole, alkaline repressed; transcript induced by amphotericin B, interaction with macrophages; possibly essential (UAU1 method); induced in oralpharyngeal candidiasis; Spider biofilm induced	115.271	99.4659	127.168	132.262	137.924	139.747	137.686	128.797
orf19.1586	FGR22	Putative phosphatidylinositol-specific phospholipase C (PI-PLC); predicted type 2 membrane protein; no S. cerevisiae ortholog; role in, and regulated by, filamentation, Hap43p; almost identical to orf19.5797	43.1325	45.4252	20.4107	24.4921	36.1145	29.4677	27.5075	27.4819
orf19.1587	HGT20	Putative glucose transporter of the major facilitator superfamily; the C. albicans glucose transporter family comprises 20 members; 12 probable membrane-spanning segments; regulated by Nrg1	10.2449	11.6532	8.75362	8.34284	3.80993	4.54033	4.24115	4.2515
orf19.1588	orf19.1588	Putative mitochondrial protein of unknown function; regulated by Sef1p-, Sfu1p-, and Hap43p	10.1827	12.6433	7.72456	10.1729	15.0267	15.0618	15.2259	15.3993
orf19.1589	orf19.1589	Putative transcription factor component of the core factor (CF) rDNA transcription factor complex; Spider biofilm induced	18.3397	18.5778	19.3189	18.8275	17.8554	16.8585	16.5369	14.9508
orf19.1589.1	orf19.1589.1	Protein of unknown function	8.00039	7.85535	5.98491	6.28983	6.48524	8.04422	8.55801	9.19517
orf19.1590	orf19.1590	Protein of unknown function	8.61363	11.5016	8.07789	8.33107	14.6773	14.8102	15.3676	16.6853
orf19.1591	ERG10	Acetyl-CoA acetyltransferase; role in ergosterol biosynthesis; soluble in hyphae; changes in protein abundance associated with azole resistance; fluconazole or ketoconazole induced; macrophage-downregulated protein; GlcNAc-induced protein	41.2843	18.3024	56.3902	50.5134	48.2137	58.2603	64.3754	50.8128
orf19.1592	orf19.1592	Protein of unknown function; Spider biofilm induced	22.6729	19.8223	28.3911	31.1924	17.436	26.1512	22.1508	24.3235
orf19.1595	orf19.1595	Protein of unknown function	8.0761	7.74634	8.58422	8.73314	8.12511	9.53318	11.3352	11.5685
orf19.1596	FGR28	Protein lacking an ortholog in S. cerevisiae; transposon mutation affects filamentous growth; possibly an essential gene, disruptants not obtained by UAU1 method	6.22855	6.13597	6.06629	6.63743	5.48065	5.07067	6.71346	6.85019
orf19.1597	ABG1	Vacuolar membrane protein; depletion causes abnormal vacuolar morphology, cell separation defect, sensitivity to cell wall stress, increased hyphal branching; essential, no mammalian homolog; Cyr1-regulated; rat catheter biofilm repressed	168.296	168.583	157.7	152.662	217.648	238.818	258.07	251.268
orf19.1598	ERG24	C-14 sterol reductase, has a role in ergosterol biosynthesis; mutation confers increased sensitivity to dyclonine; rat catheter and Spider biofilm repressed	126.301	117.134	126.353	130.719	136.104	128.966	139.107	143.67
orf19.1599	orf19.1599	Protein of unknown function	1.39946	0	1.96144	0	0.973214	0.288505	1.34999	0
orf19.1600	orf19.1600	Protein of unknown function	17.168	14.0244	13.5921	15.3486	15.2449	16.3971	16.8822	15.1608
orf19.1601	RPL3	Ribosomal protein, large subunit; induced by ciclopirox olamine treatment; genes encoding cytoplasmic ribosomal subunits are downregulated upon phagocytosis by murine macrophages; Hap43-induced gene; Spider biofilm repressed	3191.65	3352.64	3612.03	3726.52	1791.65	1622.32	1471.13	1620.63
orf19.1604	orf19.1604	Predicted Gal4-like DNA-binding transcription factor; Spider biofilm induced	30.8974	28.7518	26.4206	26.5377	17.2256	19.2845	18.1604	17.6174
orf19.1605	PMS1	Putative DNA mismatch repair factor; ortholog of S. cerevisiae PMS1 which is an ATP-binding protein involved in DNA mismatch repair	4.32122	4.46187	5.79692	5.30815	5.41987	5.48821	4.83841	5.66555
orf19.1606	orf19.1606	Protein of unknown function; Plc1-regulated	10.3687	9.67275	10.9077	10.9268	12.4446	12.9491	14.7426	13.8075
orf19.1607	ALR1	Putative transporter of divalent cations; hyphal-induced expression; rat catheter biofilm induced	37.5486	32.6047	47.7978	48.1554	53.6883	58.7736	61.4499	59.6066
orf19.1608	orf19.1608	Protein of unknown function	4.85758	4.97129	3.94034	3.89908	7.41382	7.63023	6.8111	8.39033
orf19.1609	orf19.1609	Protein of unknown function	59.3057	54.6505	61.8353	63.3887	58.4127	64.9302	54.6287	50.2373
orf19.1610	orf19.1610	Putative protein of unknown function, transcription is activated in the presence of elevated CO2	4.537	5.82464	4.7391	4.54833	9.04174	10.9569	11.6566	12.3565
orf19.1611	orf19.1611	Protein of unknown function; Spider biofilm induced	1.20775	1.24706	1.80559	1.95419	2.98629	3.48576	3.30099	4.68093
orf19.1613	ILV2	Putative acetolactate synthase; regulated by Gcn4p; induced by amino acid starvation (3-AT treatment); stationary phase enriched protein	112.026	100.409	142.56	139.601	91.4533	93.2601	95.5456	98.9652
orf19.1614	MEP1	Ammonium permease; Mep1 more efficient permease than Mep2, Mep2 has additional regulatory role; 11 predicted transmembrane regions; low mRNA abundance; hyphal downregulated; flow model biofilm induced	58.8758	57.481	22.6162	22.3794	29.5258	33.5038	27.2218	29.6274
orf19.1616	FGR23	Protein of unknown function; repressed by a1/alpha2 in white-phase cells, a-specific, alpha factor-induced; Hap43-repressed; flow model biofilm induced; Tn mutation affects filamentous growth;	4.16474	4.55673	11.9528	10.7149	5.12823	5.78951	5.7775	5.63064
orf19.1617	orf19.1617	Protein similar to S. cerevisiae Ydr282cp; transposon mutation affects filamentous growth; Hap43p-repressed gene	15.464	13.8801	13.3443	11.8589	15.3227	18.9403	16.3799	16.3998
orf19.1618	GFA1	Glucosamine-6-phosphate synthase, homotetrameric enzyme of chitin/hexosamine biosynthesis; inhibited by UDP-GlcNAc, FMDP, N-acyl peptide, kanosamine-6-P; functional homolog of S. cerevisiae Gfa1p; Cagrowth-phase regulated; catalytic Cys	68.6529	64.8544	71.245	73.3353	79.7705	78.4886	82.8656	82.1245
orf19.1618.1	orf19.1618.1	Protein of unknown function	15.3034	20.0654	27.4749	25.8734	31.6737	40.5627	35.6761	42.6516
orf19.1619	orf19.1619	Putative kinase subunit of RNA polymerase II carboxy-terminal domain kinase I; possibly an essential gene, disruptants not obtained by UAU1 method	45.4371	40.1364	39.26	40.5584	31.3739	33.8809	35.2921	32.8693
orf19.1620	orf19.1620	Protein of unknown function; induced by alpha pheromone in SpiderM medium	1.00572	1.29806	1.26862	0.836894	2.79759	2.9545	2.72859	2.75919
orf19.1621	GPA2	G-protein alpha subunit; regulates filamentous growth, copper resistance; involved in cAMP-mediated glucose signaling; reports differ on role in cAMP-PKA pathway, MAP kinase cascade; Gpr1 C terminus binds Gpa2; regulates HWP1 and ECE1	25.5368	22.9198	32.9392	35.9944	33.4413	34.6486	36.4395	41.5127
orf19.1622	YCG1	Putative condensin G	21.3895	19.3008	24.3033	24.2826	25.6465	25.0672	26.7222	24.7384
orf19.1623	CAP1	AP-1 bZIP transcription factor; apoptotic, oxidative stress response/resistance, multidrug resistance; nuclear in oxidative stress; complements S. cerevisiae yap1 mutant; oralpharyngeal candidasis-, human neutrophil, Spider biofilm induced	39.9255	38.2924	35.4787	36.3403	41.2469	41.7481	46.9317	45.5889
orf19.1624	orf19.1624	Non-catalytic subunit of N-terminal acetyltransferase of the NatC type; flow model biofilm repressed	12.8621	14.7189	18.7166	16.9917	20.4035	18.0173	20.8074	21.2203
orf19.1624.1	orf19.1624.1	Protein of unknown function	11.1532	14.5872	17.9768	16.3191	18.421	24.6598	27.5408	24.591
orf19.1625	orf19.1625	Putative ubiquinone oxidoreductase; repressed by nitric oxide; Hap43p-repressed	87.3947	93.629	131.756	128.21	153.515	146.888	150.947	165.939
orf19.1626	orf19.1626	Deoxyhypusine synthase; catalyzes formation of deoxyhypusine, the first step in hypusine biosynthesis; Spider biofilm repressed	112.526	112.346	114.966	120.062	110.598	99.2713	93.8966	89.4113
orf19.1628	LAP41	Putative aminopeptidase yscI precursor; mutant is viable; protein present in exponential and stationary growth phase yeast cultures; Spider biofilm repressed	122.427	124.082	91.3035	90.1974	103.81	101.253	113.942	113.086
orf19.163	PAN6	Protein of unknown function	45.3315	41.8123	57.5304	51.2927	58.8202	56.7983	56.5445	58.5003
orf19.1630	orf19.1630	Protein of unknown function	39.8181	34.2192	51.6309	55.5408	37.9883	41.088	38.4255	40.2264
orf19.1631	ERG6	Delta(24)-sterol C-methyltransferase, converts zymosterol to fecosterol, ergosterol biosynthesis; mutation confers nystatin resistance; Hap43, GlcNAc-, fluconazole-induced; upregulated in azole-resistant strain; Spider biofilm repressed	256.809	239.519	207.521	206.561	329.184	322.683	303.971	309.074
orf19.1632	orf19.1632	Protein of unknown function	31.9319	28.7257	22.6318	20.7064	34.4233	29.1938	30.3267	29.5088
orf19.1633	UTP4	Putative U3 snoRNA-associated protein; Hap43-induced; physically interacts with TAP-tagged Nop1; Spider biofilm induced	63.4245	66.5163	72.8299	75.1262	58.5891	55.7156	51.5215	45.3498
orf19.1634	orf19.1634	Protein of unknown function	47.0795	51.2029	45.8719	43.2848	45.1849	50.0836	47.0828	46.4846
orf19.1635	RPL12	Ribosomal protein L12, 60S ribosomal subunit; downregulated by human whole blood or polymorphonuclear cells; genes encoding cytoplasmic ribosomal subunits are downregulated upon phagocytosis by macrophage; Tbf1p-activated; Hap43p-induced	2634.9	2750.38	3233.34	3137.6	2162.38	2460.56	2434.04	2255.12
orf19.1636	STE50	Protein with sterile alpha motif (SAM) and Ras-associated domain (RAD); similar to S. cerevisiae Rad50p, which is involved in signal transduction via interaction with and regulation of MAPKKK	31.4977	27.9444	34.9741	33.4628	19.2105	22.0965	20.9446	17.4587
orf19.1637	orf19.1637	Protein of unknown function	69.4424	80.6961	62.7918	66.2855	56.7168	55.974	59.0058	63.0605
orf19.1638	orf19.1638	Protein of unknown function	20.3399	19.4407	18.7599	17.068	20.2749	18.7016	21.4027	18.5599
orf19.1639	orf19.1639	Protein of unknown function	1.48826	1.99771	1.12638	1.48612	1.7077	1.65678	0.969065	1.74988
orf19.164	orf19.164	Protein of unknown function	0	0	0	0	0	0	0	0
orf19.1641	orf19.1641	Protein of unknown function	11.742	9.42221	4.45755	5.30423	13.3917	11.8267	10.3884	10.5189
orf19.1642	orf19.1642	Ortholog of S. cerevisiae Loc1, a nuclear protein involved in asymmetric localization of ASH1 mRNA in S. cerevisiae; Hap43-induced gene; Spider biofilm induced	114.654	108.4	141.883	141.173	137.102	153.133	132.857	107.135
orf19.1643	orf19.1643	Protein of unknown function	103.19	103.437	125.035	125.133	95.783	95.2742	92.3638	91.4293
orf19.1646	orf19.1646	Protein of unknown function	71.17	63.0649	61.1835	61.4308	44.8006	42.4644	34.1741	34.8557
orf19.1647	orf19.1647	Protein of unknown function	1.91789	1.71027	1.61284	1.30578	1.75812	1.18615	1.45065	1.64003
orf19.1648	RAD50	Putative DNA double-strand break repair factor; involved in response to oxidative stress and drug resistance; flow model biofilm repressed	25.3573	26.2888	29.2025	28.8601	23.7856	23.5948	24.5574	22.5011
orf19.1649	RNA1	Putative GTPase-activating protein; protein level decreases in stationary phase cultures; Spider biofilm repressed	177.011	168.531	188.329	187.679	208.884	173.536	183.62	182.386
orf19.1650	TOM6	Predicted component of the TOM (translocase of outer membrane) complex, involved in protein import into mitochondria	203.121	209.362	179.875	215.8	83.804	104.519	92.7734	112.619
orf19.1651	orf19.1651	Protein of unknown function	0.765053	0.658295	1.32247	0.742734	1.68478	1.89263	1.66052	1.79908
orf19.1652	POX1-3	Predicted acyl-CoA oxidase; farnesol regulated; stationary phase enriched protein; Spider biofilm induced	76.4354	74.5185	50.4637	50.0678	76.2676	63.1215	59.1465	58.6669
orf19.1653	orf19.1653	Protein of unknown function	75.7684	73.4742	63.3797	64.3841	139.673	119.505	125.95	133.632
orf19.1654	orf19.1654	Predicted membrane protein; induced by prostaglandins	92.3843	110.217	89.7648	87.8105	100.326	94.8363	94.9664	92.0593
orf19.1655	PXP2	Putative acyl-CoA oxidase; enzyme of fatty acid beta-oxidation; induced during macrophage infection; opaque specific transcript; putative peroxisome targeting signal; Spider biofilm induced	3.24108	3.94333	2.97086	2.97336	6.51382	7.15602	6.51878	5.86233
orf19.1655.3	orf19.1655.3	Protein of unknown function	187.404	177.517	222.94	211.281	317.763	374.791	330.587	323.615
orf19.1656	orf19.1656	Protein with a predicted FYVE/PHD zinc finger domain; Hap43-repressed; Spider biofilm induced	26.7857	25.5917	16.3445	16.3093	19.7916	21.9702	19.9405	16.8994
orf19.1658	orf19.1658	Protein of unknown function	107.926	97.899	85.2071	83.3612	84.3639	80.8405	78.1161	82.0109
orf19.1659	ALG8	Putative glucosyltransferase involved in cell wall mannan biosynthesis; transcription is elevated in nik1 and sln1 homozygous null mutants, but not in the chk1 null mutant; possibly an essential gene, disruptants not obtained by UAU1 method	9.04485	10.9425	11.5562	11.7582	13.2009	13.9728	13.846	15.2448
orf19.166	ASG1	Gal4p family zinc-finger transcription factor with similarity to S. cerevisiae Asg1p	10.5167	11.3398	12.5518	11.309	14.948	15.5002	17.1358	16.1093
orf19.1661	DBP5	Protein of unknown function	185.522	180.496	178.672	177.535	226.814	214.014	213.315	214.177
orf19.1662	orf19.1662	Protein of unknown function	72.2976	73.4065	97.5749	93.8991	91.2879	111.74	116.561	104.731
orf19.1663	MNT2	Alpha-1,2-mannosyl transferase; adds 3rd mannose in cell-wall mannoprotein biosynthesis; partially redundant with Mnt1; role in adherence and virulence; expressed in yeast and hyphae; fungal-specific; Hap43-induced; Spider biofilm induced	37.956	37.54	43.9581	45.5429	35.2663	43.4748	40.5279	43.1147
orf19.1664	orf19.1664	Protein of unknown function; expression downregulated in an ssr1 null mutant	12.9725	13.0882	15.1529	13.7344	21.0567	20.3421	22.2716	24.7583
orf19.1665	MNT1	Alpha-1,2-mannosyl transferase; predicted type II Golgi membrane protein; adds 2nd mannose during cell-wall mannoprotein biosynthesis; required for wild-type virulence and adherence to epithelial cells; Hap43-induced	1.27968	1.2555	2.15445	1.86311	4.22856	4.79113	3.33032	4.69564
orf19.1666	orf19.1666	Ortholog of Dig2, a MAP kinase-responsive inhibitor of Ste12; regulates mating-specific genes and invasive growth in S. cerevisiae; induced by alpha pheromone in SpiderM medium	20.363	19.4165	24.1048	27.9124	13.831	18.6078	15.5659	14.7932
orf19.1667	orf19.1667	Protein with a predicted SWI/SNF-related matrix-associated actin-dependent regulator of chromatin subfamily domain; Hap43-repressed gene	9.61488	8.12461	9.47165	9.47045	9.77034	9.51433	8.70243	8.96716
orf19.1667.1	orf19.1667.1	Protein of unknown function	60.7582	62.0174	61.2349	59.05	125.306	129.367	111.573	114.884
orf19.1668	orf19.1668	Protein of unknown function; expression downregulated in an ssr1 null mutant	11.9633	11.8157	15.2085	15.249	13.8289	14.3276	14.1554	15.9639
orf19.1669	AFG3	Similar to S. cerevisiae Afg3p, a subunit of the mitochondrial inner membrane m-AAA protease; likely to be essential for growth, based on an insertional mutagenesis strategy	59.2849	58.1177	58.8663	59.8734	56.3135	49.8659	51.74	54.414
orf19.1670	BRO1	Class E vacuolar protein sorting factor; role in transport from multivesicular body to vacuole; not involved in Rim101 pathway; macrophage and pseudohyphal-repressed; flow model biofilm induced	20.6036	21.6746	24.1309	24.4376	19.8114	20.6567	21.1721	21.4392
orf19.1671	UTR2	Putative GPI anchored cell wall glycosidase; role in adhesion, hyphal growth on Spider (not serum) medium; chitin-binding, glycosyl hydrolase domains; induced during cell wall regeneration; mRNA in yeast-form cells; Spider biofilm induced	95.3893	108.09	109.971	104.109	123.814	117.669	113.52	127.282
orf19.1672	orf19.1672	Alpha subunit of COPI vesicle coatomer complex; role in ER to Golgi vesicle-mediated transport, retrograde vesicle-mediated transport, Golgi to ER transport; flow model biofilm repressed	93.996	90.1686	94.5183	92.7381	86.4144	79.4294	88.5553	88.4065
orf19.1673	PPT1	Putative serine/threonine phosphatase; induced in high iron	12.4862	12.4522	15.1959	15.3272	21.681	23.5745	26.6521	28.724
orf19.1674	CDC53	Cullin, a scaffold subunit of the SCF ubiquitin-ligase complexes; depletion leads to increased filamentous growth and premature cell death	25.0031	25.1014	30.4466	27.4611	34.9562	36.3732	35.051	37.1384
orf19.1675	orf19.1675	Protein of unknown function	31.533	30.348	27.4055	26.4782	21.3149	21.6002	20.4985	17.4542
orf19.1676	orf19.1676	Predicted potassium ion transporter; Spider biofilm induced	14.8949	13.5632	15.9284	14.2489	13.2129	18.1678	16.0602	15.9504
orf19.1677	orf19.1677	Protein of unknown function; transcript detected on high-resolution tiling arrays	91.915	88.2967	108.922	115.757	78.017	82.6101	73.0807	70.8502
orf19.1678	orf19.1678	Protein of unknown function; transcript detected on high-resolution tiling arrays	83.2102	80.5136	94.413	98.5313	57.8663	60.6164	58.7652	59.4242
orf19.1679	orf19.1679	Protein of unknown function	1.20741	0.623365	1.06615	1.51332	0.713726	0.749516	0.785118	1.62143
orf19.168	orf19.168	Protein of unknown function	63.0283	76.7873	80.8205	76.6678	84.7792	85.0764	71.3075	70.4934
orf19.1680	TFP1	Subunit of vacuolar H+-ATPase; stationary phase enriched protein; sumoylation target; Spider biofilm repressed	97.2174	99.2439	96.3115	94.6228	87.6546	86.9236	86.126	84.8145
orf19.1681	orf19.1681	Protein of unknown function	17.198	12.8831	12.0521	10.8035	19.9331	17.5187	18.0539	21.4107
orf19.1682	orf19.1682	Membrane protein; Hap43p-repressed gene; repressed by nitric oxide	205.318	207.112	234.375	220.367	222.917	222.545	223.165	205.978
orf19.1683	PPH21	Putative protein phosphatase of the Type 2A-related family (serine/threonine-specific), similar to <iS. cerevisiae</i Pph21p; caspofungin repressed; possibly an essential gene, disruptants not obtained by UAU1 method	70.9292	78.925	68.1076	74.2696	63.4747	58.1535	56.7653	58.2419
orf19.1684	orf19.1684	Protein of unknown function	12.0206	11.6935	12.774	13.6373	8.44007	9.15547	8.86459	8.02882
orf19.1685	ZCF7	Predicted Zn(II)2Cys6 transcription factor; mutant shows reduced colony wrinkling on Spider medium and is unable to utilize mannitol as a carbon source; mutants have increased colonization of mouse kidneys	9.76221	8.99022	9.85133	10.7142	4.55037	5.77649	6.07024	7.56948
orf19.1686	orf19.1686	Protein of unknown function	15.1048	16.8206	19.4226	19.6943	17.0999	15.6149	16.9323	16.0047
orf19.1687	orf19.1687	Ortholog of S. cerevisiae Prp43, an RNA helicase in the DEAH-box family that functions in both RNA polymerase I and polymerase II transcript metabolism; Hap43-induced gene	67.7228	67.9568	54.8114	56.2034	38.9448	40.1046	33.877	31.6707
orf19.169	CHO2	Putative phosphatidyl-ethanolamine N-methyltransferase; fungal-specific (no human or murine homolog); amphotericin B repressed; Hap43p-induced gene	11.609	12.6851	11.3548	10.8795	18.6545	18.514	22.9301	21.2035
orf19.1690	TOS1	Protein similar to alpha agglutinin anchor subunit; secreted; exogenously expressed protein is a substrate for Kex2 processing in vitro; fluconazole-induced; induced by alpha pheromone in SpiderM medium; Hap43-induced	300.581	281.658	321.544	325.671	177.948	166.743	155.803	161.55
orf19.1691	orf19.1691	Plasma-membrane-localized protein; filament induced; Hog1, ketoconazole, fluconazole and hypoxia-induced; regulated by Nrg1, Tup1, Upc2; induced by prostaglandins; flow model biofilm induced; rat catheter and Spider biofilm repressed	2051	2274.37	1949.51	1889.34	4296.18	4159.08	4686.95	4419.62
orf19.1693	CAS4	RAM cell wall integrity signaling network protein; cell separation, azole sensitivity; needed for hyphal growth; insertion mutation near 3' end of gene increases caspofungin sensitivity; pheromone/hyphal induced; flow biofilm repressed	30.5002	27.6818	29.1725	29.4469	21.2764	19.4592	21.3321	19.9693
orf19.1697	orf19.1697	Protein of unknown function	147.969	144.242	207.696	214.34	165.431	169.156	162.411	162.457
orf19.1698	orf19.1698	Protein of unknown function	27.8885	27.7302	26.6712	28.1549	20.369	22.7525	23.6985	21.0823
orf19.1699	BZZ1	Protein similar to <iS. cerevisiae</i Bzz1p, which is an SH3 domain protein involved in the regulation of actin polymerization	47.9368	52.9241	57.7563	54.6722	60.0631	56.5419	59.1855	66.4893
orf19.17	SCP1	Putative cortical actin cytoskeleton protein; constitutive expression independent of MTL or white-opaque status	9.12764	12.2381	9.16515	7.70881	19.2322	20.7268	26.0208	26.0563
orf19.1700	RPS7A	Ribosomal protein S7; genes encoding cytoplasmic ribosomal subunits, translation factors, and tRNA synthetases are downregulated upon phagocytosis by murine macrophage; Spider biofilm repressed	1367.53	1328.17	2001.16	1737.98	1442	1701.59	1625.7	1684.95
orf19.1701	RKI1	Protein of unknown function	8.919	8.57417	16.3585	16.3792	12.9931	14.4084	14.2407	15.8508
orf19.1702	ARF3	Similar to but not orthologous to S. cerevisae Arf3; transcript filament induced; Tup1 regulated; rat catheter biofilm repressed (see Locus History Note for Assembly 19 correction)	44.7368	47.1917	48.8735	48.4289	69.5653	76.7728	79.1378	86.4996
orf19.1704	FOX3	Putative peroxisomal 3-oxoacyl CoA thiolase; transcript regulated by white-opaque switch; Spider biofilm induced	29.9269	28.633	24.5665	26.9138	42.9603	36.0326	39.3705	40.934
orf19.1706	MET18	Putative protein with a predicted role in nucleotide excision repair (NER) and RNA polymerase II (RNAP II) transcription; Plc1p-regulated	5.11859	6.32292	7.50819	6.82666	9.96358	11.7809	13.7646	13.8139
orf19.1707	orf19.1707	Protein of unknown function	4.5099	6.72633	9.06001	8.33968	8.01496	13.486	23.2026	16.8901
orf19.1708	orf19.1708	Protein of unknown function; Spider biofilm induced	42.5766	46.8182	41.7954	46.2398	44.8211	55.669	49.2981	48.0246
orf19.1709	orf19.1709	Sterol carrier domain protein; alkaline downregulated; colony morphology-related gene regulation by Ssn6; Spider biofilm induced	65.7225	61.8781	62.1625	57.16	82.5637	90.6472	90.293	87.7455
orf19.171	DBP2	Putative DEAD-box family ATP-dependent RNA helicase; flucytosine induced; repressed in core stress response	137.856	145.053	106.587	112.289	49.6374	51.4592	42.6672	34.5032
orf19.1710	ALI1	Putative NADH-ubiquinone oxidoreductase; in detergent-resistant membrane fraction (possible lipid raft component); predicted N-terminal acetylation; nitric oxide-repressed; plasma membrane-localized; protein decreases in stationary phase	34.0474	42.5898	51.3905	48.1246	53.8278	66.4028	62.7356	68.7123
orf19.1711	END3	Regulated by Gcn4p; induced in response to amino acid starvation (3-aminotriazole treatment)	31.1783	34.27	28.8622	30.0246	63.3851	68.9665	79.3593	77.605
orf19.1712	GEA2	Putative ARF GTP/GDP exchange factor; induced in low iron; flow model biofilm repressed	26.0061	28.777	29.6355	29.7139	28.8314	30.9263	37.1027	35.9274
orf19.1714	PGA44	Putative GPI-anchored protein	1.68393	1.54645	2.04605	1.56966	0.908447	0.933833	0.885739	1.21557
orf19.1715	IRO1	Putative transcription factor; role in iron utilization, pathogenesis; both IRO1 and adjacent URA3 are mutated in strain CAI4; suppresses S. cerevisiae aft1 mutant low-iron growth defect; hyphal-induced; reports differ about iron regulation	51.3326	47.6132	52.1472	51.9961	29.5649	21.2057	21.0013	23.9008
orf19.1716	URA3	Orotidine-5'-phosphate decarboxylase; pyrimidine biosynthesis; gene used as genetic marker; decreased expression when integrated at ectopic chromosomal locations can cause defects in hyphal growth and virulence; Spider biofilm repressed	64.3861	57.7768	73.8846	69.8784	34.0271	31.0794	26.2513	27.794
orf19.1717	orf19.1717	Protein of unknown function	2.60496	2.29851	4.26174	4.21712	4.28183	3.92515	4.55744	4.78923
orf19.1718	ZCF8	Predicted Zn(II)2Cys6 transcription factor; repressed by fluphenazine treatment; required for yeast cell adherence to silicone substrate	8.42623	9.00847	10.9947	11.2933	11.3047	12.3288	15.6094	13.5607
orf19.1719	SGA1	Putative glucoamylase; induced in oralpharyngeal candidasis; rat catheter and Spider biofilm induced	11.3554	12.4839	12.6705	12.232	20.9814	20.705	22.6258	19.5016
orf19.172	RPC19	Putative RNA polymerases I and III subunit AC19; Hap43-induced; rat catheter biofilm induced	111.76	113.832	103.486	91.0503	204.22	191.677	206.281	200.485
orf19.1720	orf19.1720	Protein of unknown function	9.40593	9.30376	9.76259	9.35482	6.73753	9.32853	8.33777	7.39507
orf19.1721	NCE103	Carbonic anhydrase; converts of CO2 to bicarbonate; essential for virulence in host niches with limited CO2, normal white-opaque switch; Mnl1-induced in weak acid stress; Hap43-induced gene; F-12/CO2, rat catheter, Spider biofilm induced	35.4397	34.5117	22.7485	22.4562	28.5798	32.7767	24.1348	26.0467
orf19.1722	orf19.1722	Protein of unknown function	24.556	27.4393	15.8412	13.436	17.0768	19.1398	13.142	11.0745
orf19.1723	orf19.1723	Protein of unknown function	63.1671	63.6466	44.855	38.4302	58.9907	57.4196	56.401	56.6196
orf19.1724	orf19.1724	Protein of unknown function; induced by nitric oxide independent of Yhb1p	5.15714	4.20394	2.51081	2.93625	2.6426	2.6859	2.16013	1.48933
orf19.1725	orf19.1725	Putative adhesin-like protein	9.77058	7.20613	9.88326	8.96673	6.60055	5.33488	5.73591	5.29549
orf19.1727	PMC1	Vacuolar calcium P-type ATPase; transcript regulated by calcineurin and fluconazole; mutant shows increased resistance to fluconazole, lithium; increased sensitivity to calcium; Spider biofilm induced	28.6679	26.8641	20.1559	19.2878	25.1393	23.6827	27.1196	26.5533
orf19.1728	orf19.1728	Protein of unknown function	1.67036	3.27698	2.66888	3.05793	6.38883	8.78098	6.28413	9.29623
orf19.1729	orf19.1729	Putative transcription factor with zinc finger DNA-binding motif	8.7532	9.66437	10.5056	10.0049	15.8968	15.5683	16.6852	17.5555
orf19.173	orf19.173	C2H2 transcription factor; induced by Mnl1 under weak acid stress	27.4321	24.8916	21.1688	22.7386	21.1225	23.3593	23.4708	21.3024
orf19.1730	orf19.1730	HMG-box protein; Spider biofilm repressed	67.4345	70.057	59.2164	61.6297	60.3189	62.7636	53.583	60.5155
orf19.1734	orf19.1734	Putative ATPase and nucleosome spacing factor; heterozygous null mutant displays sensitivity to virgineone	32.6831	32.6975	31.2182	32.197	31.7307	30.2152	31.8374	30.4409
orf19.1735	orf19.1735	Protein of unknown function	22.3225	26.7235	29.7902	25.171	72.5559	88.7364	73.2606	77.979
orf19.1736	orf19.1736	Protein of unknown function; transcript detected on high-resolution tiling arrays	2.00445	1.65576	2.44416	2.83557	2.71819	2.47937	2.61036	2.5925
orf19.1737	orf19.1737	Protein of unknown function	1.86594	0.963337	1.56915	0.38818	1.94643	0.865514	1.34999	1.09698
orf19.1738	UGP1	UTP-glucose-1-phosphaturidyl transferase; localizes to yeast, not hyphal cell surface; Hog1-repressed; stationary phase enriched; induced in oralpharyngeal candidasis; rat catheter biofilm repressed; Bcr1-repressed in RPMI a/a biofilms	401.523	392.747	334.788	357.407	462.712	404.387	476.844	472.018
orf19.1738.1	orf19.1738.1	Protein involved in microtubule morphogenesis; required for protection from excess free beta-tubulin; possibly involved the beta-tubulin folding; Spider biofilm repressed	244.148	259.457	226.445	211.641	193.164	245.92	210.787	307.428
orf19.1741	DIT1	Protein of unknown function	3.0102	2.64823	3.36259	4.70052	4.31167	4.89039	5.16834	5.77564
orf19.1742	HEM3	Hydroxymethylbilane synthase; converts 4-porphobilinogen to hydroxymethylbilane in heme biosynthesis; induced in high iron, CO2; alkaline repressed; regulated by Sef1, Sfu1, and Hap43; rat catheter and Spider biofilm induced	39.2469	37.6332	38.831	37.7136	63.266	63.8078	62.4889	65.3225
orf19.1743	ACS1	Acetyl-CoA synthetase; induced by human neutrophils; fluconazole-repressed; regulated by Nrg1/Mig1; colony morphology-related gene regulation by Ssn6; only in stationary phase cultures; rat catheter biofilm repressed, Spider biofilm induced	58.0091	53.7605	54.2749	57.1582	62.9653	56.6673	64.2076	60.1023
orf19.1744	HEM4	Putative uroporphyrinogen III synthase; induced in high iron or elevated CO2; alkaline, Hap43-repressed	18.8295	19.3502	27.8399	23.3175	37.4217	45.4778	44.8719	46.0979
orf19.1745	orf19.1745	Protein of unknown function; Hap43-repressed gene	5.47783	4.21638	5.23469	5.09701	5.67948	6.00571	5.51238	4.76227
orf19.1746	orf19.1746	Protein similar to S. cerevisiae meiosis-specific, spore-wall-localized protein Ssp2p, which is required for wild-type outer spore wall formation in S. cerevisiae; possibly an essential gene (UAU1 method); Hap43p-repressed	1.66056	1.51677	3.22255	2.81678	2.30959	2.528	3.32696	4.45565
orf19.1747	KIP2	Putative kinesin-related motor protein involved in mitotic spindle positioning; repressed by alpha pheromone in SpiderM medium; periodic mRNA expression, peak at cell-cycle G2/M phase	9.42244	10.0583	15.6091	14.473	9.82886	10.4719	11.4301	11.8285
orf19.1748	orf19.1748	Protein of unknown function; shows colony morphology-related gene regulation by Ssn6	4.58237	3.55161	2.60335	3.14172	4.09683	4.10065	4.34105	4.20059
orf19.175	orf19.175	Protein of unknown function	5.49812	6.66761	6.88885	7.89144	9.10961	10.432	10.1179	10.7595
orf19.1750	SLR1	Protein similar to mammalian SR-like RNA splicing factor; involved in filamentous growth and virulence; gene has intron; Spider biofilm repressed	353.521	327.757	252.353	299.683	269.161	196.746	176.907	185.927
orf19.1751	SPT23	Protein involved in regulation of unsaturated fatty acid biosynthesis; controls the expression of the Ole1p delta-9-fatty acid desaturase	82.2659	80.083	60.8344	58.64	57.7224	56.4908	59.0467	55.1044
orf19.1753	PUS7	Pseudouridine synthase; catalyzes pseudouridylation in U2 snRNA, 5S rRNA, cytoplasmic tRNAs and in pre-tRNA(Tyr); F-12/CO2 early biofilm induced	56.5772	60.6435	58.0931	56.7242	54.1932	62.6324	59.6399	55.6341
orf19.1754	CMK2	Putative calmodulin-dependent protein kinase; involved in cell wall integrity and oxidative stress response	41.9463	43.2262	36.7688	36.7965	40.6662	39.923	38.8391	40.6546
orf19.1755	SET2	Protein of unknown function	25.0463	27.0396	33.1617	33.2313	25.8944	29.724	28.3287	28.2276
orf19.1756	GPD1	Glycerol-3-phosphate dehydrogenase; glycerol biosynthesis; regulated by Efg1; regulated by Tsa1, Tsa1B under H2O2 stress conditions; Sflow model and Spider biofilm induced	39.3474	39.5611	37.9687	36.612	47.6781	47.8096	42.5574	42.4635
orf19.1757	orf19.1757	Putative C2H2 transcription factor; expression upregulated in clinical isolates from HIV+ patients with oral candidiasis; Spider biofilm induced	12.6909	10.1336	12.8952	14.1918	14.7085	11.3013	14.2288	16.7293
orf19.1759	PHO23	Protein of unknown function	37.9764	41.7245	35.987	36.4878	39.0638	43.4225	41.1942	42.5601
orf19.176	OPT4	Oligopeptide transporter; detected at germ tube plasma membrane; transcript inducede during phagocytosis by macrophages; fungal-specific; Hap43-repressed; merged with orf19.2292 in Assembly 20; rat catheter and Spider biofilm induced	2.22385	2.4313	6.60044	6.11769	3.52969	3.70541	5.22429	5.39362
orf19.1760	RAS1	RAS signal transduction GTPase; regulates cAMP and MAP kinase pathways; role in hyphal induction, virulence, apoptosis, heat-shock sensitivity; nonessential; plasma membrane-localized; complements viability of S. cerevisiae ras1 ras2 mutant	93.9431	87.6774	85.3769	83.8575	81.7522	97.8353	86.4334	92.376
orf19.1761	orf19.1761	Predicted olichyl-diphosphooligosaccharide-protein glycotransferase; role in protein N-linked glycosylation; Spider biofilm repressed	31.2381	35.1851	36.3819	33.2088	62.332	73.3785	88.2502	105.441
orf19.1762	OCA1	Putative protein phosphatase of the PTP family (tyrosine-specific); ortholog of S. cerevisiae Oca1; mutant is viable; mutant shows virulence defect	14.9352	15.1934	16.5193	18.183	21.2842	23.115	21.5577	24.5663
orf19.1763	IFR1	Predicted oxidoreductase/dehydrogenase; induced by nitric oxide; rat catheter and Spider biofilm induced	4.80119	4.04685	3.42251	4.06455	6.83431	6.50529	7.47489	7.65067
orf19.1764	orf19.1764	Protein of unknown function; rat catheter and Spider biofilm induced	50.8679	61.2608	57.9441	51.7042	55.2141	68.4225	73.8497	68.8308
orf19.1765	orf19.1765	Secreted protein; fluconazole-induced	17.4838	17.6775	11.9857	10.071	21.0612	23.6748	24.3547	20.0502
orf19.1766	orf19.1766	Secreted protein; fluconazole-induced	7.65228	8.41825	4.8113	3.80874	22.4799	22.3806	24.1633	22.3115
orf19.1767	orf19.1767	Protein of unknown function	4.18671	6.13709	5.94132	5.94133	9.72245	10.6116	10.7639	13.6546
orf19.1768	orf19.1768	Protein of unknown function	1.61745	1.35544	2.64152	2.98448	1.9562	2.33412	2.91705	2.75621
orf19.1769	orf19.1769	Protein of unknown function	23.2318	26.8553	21.3023	22.0938	40.0366	38.6639	41.7504	42.0487
orf19.177	orf19.177	Protein of unknown function	4.15834	3.29379	5.46095	4.74015	4.23867	5.00265	5.39884	5.15725
orf19.1770	CYC1	Cytochrome c; complements defects of S. cerevisiae cyc1 cyc7 double mutant; induced in high iron; alkaline repressed; repressed by nitric oxide; Hap43-dependent repression in low iron; regulated by Sef1, Sfu1	308.243	312.67	508.385	492.311	690.268	772.755	728.103	751.837
orf19.1771	CWC22	Predicted spliceosome-associated protein; role in pre-mRNA splicing; Spider biofilm induced	10.8736	10.9546	11.6523	13.1326	14.8609	14.3605	15.6246	14.6792
orf19.1772	orf19.1772	Protein of unknown function	15.0824	17.0101	18.3252	18.1747	18.1435	21.2222	20.7094	19.477
orf19.1773	RAP1	Transcription factor; binds telomeres and regulatory sequences in DNA; involved in telomere maintenance; represses hyphal growth under yeast-favoring conditions; similar to (but shorter than) S. cerevisiae Rap1	18.4255	21.2841	24.3664	27.7522	15.7886	17.3187	18.5714	20.6546
orf19.1774	orf19.1774	Predicted dehydrogenase; transcript upregulated in an RHE model of oral candidiasis; virulence-group-correlated expression; Spider biofilm repressed	0.651453	1.16186	0.896455	0.887069	1.89451	1.57497	1.32826	1.53194
orf19.1776	orf19.1776	Putative pantetheine-phosphate adenylyltransferase (PPAT); which catalyzes 4th step in coenzyme A biosynthesis from pantothenate; rat catheter biofilm repressed	22.0759	24.8233	14.8063	13.8818	20.9785	26.8298	24.3617	27.5119
orf19.1777	orf19.1777	Protein of unknown function	40.1548	37.2941	38.6168	38.7723	59.5805	57.8608	62.6225	60.5534
orf19.1778	orf19.1778	Dubious open reading frame	0.631273	2.60728	0	1.05061	1.75601	1.9521	0.913438	0
orf19.1779	MP65	Cell surface mannoprotein; cell-wall glucan metabolism, adhesion; adhesin motif; O-glycosylation; induced by heat, germ tube formation, wall regeneration; mycelial antigen; diagnostic marker; fluconazole-repressed; Spider biofilm induced	1030.79	953.131	667.484	665.223	1082.4	996.567	872.764	789.157
orf19.178	orf19.178	Protein of unknown function	14.571	15.4936	17.2722	15.7133	20.4226	27.2848	30.94	23.4715
orf19.1780	orf19.1780	Protein of unknown function	1.86938	2.1447	1.45559	0.979441	3.03336	2.86895	2.65486	2.71358
orf19.1782	orf19.1782	Membrane-localized protein of unknown function	101.756	104.513	130.842	131.485	148.193	145.698	148.017	136.846
orf19.1782.1	orf19.1782.1	Protein of unknown function	4.84646	4.82548	3.78447	2.44856	2.52775	3.21146	3.50636	3.93462
orf19.1783	YOR1	Protein similar to S. cerevisiae Yor1; ABC-type plasma membrane transporter involved in resistance to aureobasidin A; white cell type-specific transcript; Spider biofilm induced	16.6633	16.2581	16.1791	16.5188	13.8161	14.179	14.1291	13.087
orf19.1785	orf19.1785	Protein with a PI31 proteasome regulator domain; Hap43-repressed; flow model biofilm induced	120.904	113.027	106.444	101.99	179.665	190.622	193.554	200.42
orf19.1789	orf19.1789	Protein of unknown function	15.386	15.994	15.2064	16.4536	8.32703	11.1706	23.0185	21.6668
orf19.1789.1	LYS1	Saccharopine dehydrogenase (biosynthetic); enzyme of alpha-aminoadipate lysine biosynthesis pathway; functionally complements S. cerevisiae lys1 mutation; fungal-specific (no human or murine homolog)	85.0861	78.9984	116.076	114.778	163.187	149.367	175.769	174.653
orf19.1791	orf19.1791	Putative protein with a predicted role in 60S ribosomal subunit biogenesis; Hap43p-induced gene; ortholog of <iS. cerevisiae</i MAK11	35.1007	34.2512	44.4058	40.2161	48.4481	52.3216	47.3551	48.9056
orf19.1792	orf19.1792	Protein of unknown function	6.23842	7.65556	8.65202	8.80604	10.1758	10.7465	10.0666	11.9307
orf19.1793	orf19.1793	Protein of unknown function	8.21217	8.18452	8.07696	8.58663	6.35651	8.32503	7.82717	6.88499
orf19.1794	orf19.1794	Protein of unknown function	14.8464	15.6332	17.8003	20.6108	17.429	21.8185	24.1411	26.9045
orf19.1795	PUF3	Ortholog os S. cerevisiae Puf3; mRNA-binding protein involved in RNA catabolism; mutant is viable	8.80139	5.741	10.3831	8.60828	15.3283	16.6702	14.5313	19.1269
orf19.1795.1	orf19.1795.1	Protein of unknown function	6.05854	10.57	10.7168	9.38768	15.2548	28.9422	28.5669	26.8567
orf19.1796	orf19.1796	Putative glyoxylate reductase; acts on glyoxylate and hydroxypyruvate substrates; Spider biofilm repressed	93.5661	86.7714	63.4881	60.9696	157.076	130.929	142.865	150.372
orf19.1797	orf19.1797	D-arabinose 5-phosphate isomerase; has GutQ domain which is associated with phosphosugar binding; other biofilm induced; rat catheter and Spider biofilm induced; F-12/CO2 early biofilm induced	19.7233	21.2575	13.9199	12.6381	17.3332	23.4395	19.5058	17.1743
orf19.1798	TSC2	Putative GTPase-activating protein; similar to mammalian tuberin; involved in control of filamentous growth; mutants are viable	2.96689	4.02835	3.98294	3.62181	3.3815	3.94302	4.6507	4.11257
orf19.1799	GAP5	Putative general amino acid permease; fungal-specific (no human or murine homolog)	79.6015	89.2397	67.2889	68.7357	62.5014	55.9111	54.7316	51.2748
orf19.18	IMH3	Inosine monophosphate (IMP) dehydrogenase; enzyme of GMP biosynthesis; target of mycophenolic acid and mizoribine monophosphate; antigenic during infection; repressed in core stress response; snoRNA snR54 encoded within IMH3 intron	369.378	365.618	362.672	361.636	326.668	283.116	276.44	270.267
orf19.1800	orf19.1800	Protein of unknown function; Spider biofilm induced	33.5193	37.2995	26.0308	26.383	63.3035	59.5809	60.7465	63.746
orf19.1801	CBR1	Putative cytochrome B5 reductase; plasma membrane-localized	130.435	117.006	136.827	130.289	192.679	188.887	193.753	194.05
orf19.1802	OFD1	Putative prolyl hydroxylase family member; regulates Ume6p stability in response to oxygen; inhibited by hypoxia; repressed by prostaglandins; Spider biofilm induced	94.8728	88.1245	99.63	95.5455	111.106	114.008	111.623	104.053
orf19.1803	CDC43	Beta subunit of heterodimeric protein geranylgeranyltransferase type I; GGTase I enzyme binds zinc, is Mg-dependent; Cdc42p is GGTase I substrate	0.720478	0.915604	1.30497	1.06072	2.00415	1.88519	2.80677	2.87464
orf19.1804	orf19.1804	Protein of unknown function	21.1272	19.1068	22.5112	20.9046	20.6224	22.1924	24.3606	23.8521
orf19.1805	PEX14	Protein of unknown function	30.6105	28.1702	31.1275	31.8926	35.9464	41.0755	41.4105	37.4344
orf19.1806	orf19.1806	Protein of unknown function	6.52769	7.99555	9.21054	10.3418	5.30925	7.40338	6.72945	5.86967
orf19.1808	MED5	RNA polymerase II mediator complex subunit; transcription positively regulated by Tbf1p	6.2501	6.89941	7.62594	7.71631	10.3367	10.9076	11.8863	12.5776
orf19.1813	FLC2	Protein involved in heme uptake; putative FAD transporter, similar to S. cerevisiae Flc2p	37.8611	38.7309	27.0737	29.6487	29.3111	29.4014	28.9884	27.9089
orf19.1814	STT4	Putative phosphatidylinositol-4-kinase	22.6612	21.703	20.2729	20.1015	24.9299	23.0124	25.5016	24.3824
orf19.1815	orf19.1815	Ortholog of S. cerevisae/S. pombe Tif6; constituent of 66S pre-ribosomal particles; Spider biofilm induced	210.649	195.06	210.218	201.962	138.291	138.083	120.216	133.857
orf19.1816	ALS3	Cell wall adhesin; epithelial adhesion, endothelial invasion; alleles vary in adhesiveness; immunoprotective in mice; binds SspB adhesin of S. gordonii in mixed biofilm; induced in/required for Spider biofilm; flow model biofilm repressed	28.3741	26.7276	23.6425	25.16	17.7302	16.4909	15.4706	13.5212
orf19.182	orf19.182	Protein of unknown function	34.7797	32.0077	37.1914	37.3899	48.8542	49.8757	50.4858	45.59
orf19.1821	orf19.1821	Protein of unknown function; repressed by alpha pheromone in SpiderM medium	0	0.668114	0	0	0	0.400179	0	0
orf19.1822	UME6	Zn(II)2Cys6 transcription factor; role in hyphal extension, virulence, adherence to plastic; rat catheter biofilm induced; has a long 5'-UTR that regulates translational efficiency and controls transition to filamentous growth	0.800328	0.794593	1.03543	0.896515	1.19876	1.12321	0.957625	0.965147
orf19.1823	orf19.1823	Predicted membrane protein; transcript repressed by ciclopirox olamine	7.89039	6.75817	7.48381	8.05128	7.66403	7.74387	9.67656	9.12535
orf19.1824	PGA50	Putative GPI-anchored protein; adhesin-like protein	0	0.101917	0.0830045	0.246406	0	0.12209	0	0.0773703
orf19.1825	orf19.1825	Protein of unknown function; mutants are viable; filament induced; regulated by Nrg1, Rfg1, Tup1	1.80151	0.998968	2.18828	2.41522	1.69362	1.69189	1.64129	2.09205
orf19.1826	MDM34	Putative zinc finger transcription factor; macrophage-downregulated; flow model biofilm induced; flow model and Spider biofilm induced	12.477	12.849	11.6305	12.2503	17.8586	21.7411	22.5196	19.1206
orf19.1827	orf19.1827	Protein of unknown function; flow model biofilm induced; induced by alpha pheromone in SpiderM medium	0.558388	0.704687	0.365222	0.30977	0.517754	0.729057	0.763088	0.875396
orf19.1828	BUD16	Putative pyridoxal kinase; a key enzyme in pyridoxal 5'-phosphate synthesis, the active form of vitamin B6; involved in bud-site selection and genome integrity in S. cerevisiae; induced by alpha pheromone in SpiderM medium	16.9595	16.3399	18.5807	16.9451	20.6395	23.5999	26.7002	26.8218
orf19.183	HIS3	Imidazoleglycerol-phosphate dehydratase, enzyme of histidine biosynthesis; functionally complements S. cerevisiae his3-1 mutation; hyphal-induced expression; regulated by Gcn2p and Gcn4p; fungal-specific (no human or murine homolog)	10.7103	11.3304	14.8687	14.7106	11.397	10.6944	12.1427	12.9505
orf19.1830	orf19.1830	Protein of unknown function; Hap43-induced; rat catheter and Spider biofilm induced	6.38062	6.68965	6.52142	6.04472	9.20514	11.2314	11.6473	12.0806
orf19.1831	orf19.1831	Dubious open reading frame	0	0.337833	0	0	0.455062	0	0	0
orf19.1832	FCY23	Putative transporter; Gcn4p-regulated; more similar to S. cerevisiae Tpn1p, which is a vitamin B6 transporter, than to purine-cytosine permeases	22.1176	22.8795	25.5491	26.394	15.4376	15.8587	17.0809	18.6972
orf19.1833	orf19.1833	Protein of unknown function	164.828	150.862	156.862	151.434	160.412	165.483	153.479	150.964
orf19.1834	orf19.1834	Protein of unknown function	7.08873	10.0042	13.4019	14.3358	9.88989	11.8204	11.7953	13.8113
orf19.1835	PEA2	Putative coiled-coil polarisome; predicted role in polarized morphogenesis, cell fusion, and low affinity Ca2+ influx; rat catheter biofilm induced	20.0363	20.2467	23.6251	23.2591	17.256	19.6019	21.0734	21.4905
orf19.1836	APN2	Putative class II abasic (AP) endonuclease; flucytosine induced	20.6623	18.6162	21.7077	17.7654	26.4693	28.1065	28.8627	27.5024
orf19.1837	TBP1	Transcription initiation factor; binds TATA box sequence, binding does not require TFIIA; caspofungin repressed; functional homolog of S. cerevisiae and human TATA-binding proteins; Spider biofilm induced	153.866	135.964	129.654	130.605	229.202	200.256	222.087	239.957
orf19.1839	RPA190	Putative RNA polymerase I subunit A190; Hap43p-induced gene; flucytosine induced	65.9741	62.9528	66.0391	68.4057	39.592	37.3468	32.6111	30.4131
orf19.184	MDM10	Predicted component of the mitochondrial sorting and assembly machinery (SAM complex) and ER-mitochondria encounter structure (ERMES) complex with a role in protein import into mitochondria	8.52064	8.29946	9.48452	10.2743	8.21662	9.90335	9.79125	6.93379
orf19.1840	orf19.1840	Predicted lipid-binding ER protein; involved in ER-plasma membrane tethering; Spider biofilm induced	145.925	132.972	118.797	123.234	136.413	114.912	114.788	117.437
orf19.1841	orf19.1841	Protein of unknown function; Hap43-induced gene	2.54564	3.15419	3.05055	2.80677	3.58485	5.62843	7.64323	5.78673
orf19.1842	BUD5	Predicted GTP/GDP exchange factor for Rsr1; rat catheter biofilm induced	11.3201	11.5395	12.5673	13.0365	12.7422	12.3501	15.1473	12.5291
orf19.1843	ALG6	Putative glucosyltransferase involved in cell wall mannan biosynthesis; transcription is elevated in chk1, nik1, and sln1 homozygous null mutants; repressed by nitric oxide; possibly essential gene, disruptants not obtained by UAU1 method	8.68006	9.69923	11.1658	12.7969	8.98556	13.9478	14.7966	16.9011
orf19.1844	orf19.1844	Protein similar to ferric reductase Fre10p	0.419065	0.324528	0.440511	0.494019	0.825711	0.755932	0.707441	0.848595
orf19.1847	ARO10	Aromatic decarboxylase; Ehrlich fusel oil pathway of aromatic alcohol biosynthesis; alkaline repressed; protein abundance affected by URA3 expression in CAI-4 strain; Spider biofilm induced	10.9662	11.4973	31.7448	33.3428	33.4084	29.9247	41.9028	45.9286
orf19.1848.1	orf19.1848.1	Protein of unknown function	28.8796	36.9954	26.8835	24.6744	24.6962	31.5194	32.4672	28.2741
orf19.1849	orf19.1849	Protein of unknown function	26.0519	26.335	28.2885	27.9377	24.0135	23.3225	23.5337	21.9336
orf19.185	orf19.185	Protein of unknown function	31.1383	31.6848	41.0599	34.6816	35.2231	42.5031	39.2328	42.0957
orf19.1850	SIW14	Putative protein phosphatase of the PTP family (tyrosine-specific), similar to <iS. cerevisiae</i Siw14p; mutant shows virulence defect; Hap43p-repressed gene	9.70183	11.1921	16.5424	13.474	13.959	15.2696	15.8294	16.1014
orf19.1852	orf19.1852	Protein of unknown function	79.1334	83.9141	82.2104	88.2605	68.4796	70.8069	62.574	62.7735
orf19.1853	HHT2	Putative histone H3; farnesol regulated; Hap43-induced; rat catheter and Spider biofilm repressed	190.785	203.341	168.687	156.257	193.786	181.964	220.433	183.169
orf19.1854	HHF22	Putative histone H4; regulated by Efg1; flucytosine, fluconazole-induced; amphotericin B, caspofungin repressed; colony morphology-related gene regulation by Ssn6; Hap43-induced; rat catheter and Spider biofilm repressed	404.314	467.388	458.677	444.325	456.04	417.578	409.264	438.345
orf19.1855	orf19.1855	Predicted membrane transporter, member of the anion:cation symporter (ACS) family, major facilitator superfamily (MFS); Gcn4p-regulated; flucytosine induced; ketoconazole-repressed; oxidative stress-induced via Cap1p	5.25078	4.54513	5.35698	4.60236	3.07437	3.68683	3.59194	4.1501
orf19.1856	orf19.1856	Protein of unknown function	31.8721	30.9566	25.4477	30.1359	39.5552	40.4197	40.2901	38.326
orf19.1857	orf19.1857	Putative L-azetidine-2-carboxylic acid acetyltransferase; mutants are viable	42.8019	46.1065	35.3469	36.4094	45.7597	42.7371	44.0606	42.2548
orf19.1860	LSC2	Putative succinate-CoA ligase beta subunit; regulated by Mig1, Tup1; induced in high iron; protein present in exponential and stationary growth phase yeast cells; Spider biofilm repressed	180.024	258.722	264.885	288.964	219.846	234.124	205.934	174.505
orf19.1860.1	orf19.1860.1	Protein of unknown function	53.7334	54.4328	55.716	51.288	49.2878	52.3724	51.4719	51.8616
orf19.1861	orf19.1861	Protein of unknown function; flow model biofilm induced	43.063	41.5464	38.3712	37.1649	56.2734	52.0276	52.6031	51.4492
orf19.1862	orf19.1862	Possible stress protein; increased transcription associated with CDR1 and CDR2 overexpression or fluphenazine treatment; regulated by Sfu1, Nrg1, Tup1; stationary phase enriched protein; Spider biofilm induced	582.748	664.288	330.529	332.445	943.034	795.598	903.379	870.247
orf19.1863	orf19.1863	Protein of unknown function	0.588118	0.560548	0.722838	0.564687	1.16405	1.76269	2.06203	1.73762
orf19.1864	orf19.1864	Protein of unknown function	64.6835	61.9984	51.3448	49.9123	40.9881	38.6639	36.2004	37.8152
orf19.1865	MCS7	S. cerevisiae ortholog Mcs7 has a role in reciprocal meiotic recombination; Spider biofilm repressed	155.486	149.028	136.704	140.861	114.731	98.1261	94.0268	99.3815
orf19.1866	VMA10	Subunit G of the V1 peripheral membrane domain of the vacuolar H+-ATPase (V-ATPase); involved in vacuolar acidification; rat catheter biofilm repressed	289.982	237.877	240.479	248.271	587.632	621.904	604.08	578.106
orf19.1867	orf19.1867	Putative malate permease; induced during macrophage infection; regulated by Gcn2 and Gcn4; putative peroxisome targeting signal; Hap43-repressed; Spider biofilm induced	7.12279	8.02323	5.86885	7.00297	6.89189	8.71587	7.89883	6.82037
orf19.1868	RNR22	Putative ribonucleoside diphosphate reductase;colony morphology-related gene regulation by Ssn6; transcript regulated by tyrosol and cell density; Hap43-repressed; Spider biofilm induced	149.409	134.579	148.75	152.218	201.261	201.428	211.713	211.865
orf19.1871	orf19.1871	Protein of unknown function	38.709	35.6549	39.4051	41.9777	24.6194	23.0453	22.0776	24.0471
orf19.1872	orf19.1872	Plasma membrane protein; repressed by nitric oxide	328.754	335.436	364.505	356.453	323.085	284.738	263.123	261.531
orf19.1873	orf19.1873	Protein of unknown function; Hap43-repressed gene; repressed by nitric oxide	210.77	220.062	244.296	236.139	169.736	204.737	187.418	192.904
orf19.1874	orf19.1874	Protein of unknown function	0.315957	0.0652452	0.476966	0.210319	0.483386	0.312654	0.182872	0.460236
orf19.1876	orf19.1876	Protein of unknown function	32.5305	30.6615	33.1338	33.0918	18.4636	20.4378	19.3207	19.0575
orf19.1877	orf19.1877	Protein of unknown function	17.3586	19.2788	20.0178	20.1182	26.9515	25.091	29.4936	34.7965
orf19.1878	MED4	RNA polymerase II core mediator complex subunit	29.5518	30.6569	28.7599	31.6914	22.8184	22.138	23.0366	22.2401
orf19.188	orf19.188	Protein of unknown function	10.9565	8.8195	17.4289	14.3834	30.7489	26.3788	25.0013	28.8418
orf19.1880	HEM15	Putative ferrochelatase involved in heme biosynthesis; transcript not regulated by iron levels and not affected by a yfh1 null mutation; Spider biofilm repressed	172.341	177.529	164.436	169.428	122.36	119.228	115.378	126.066
orf19.1881	LPT1	Lysophospholipid acyltransferase, involved in phospholipid remodeling; role in glycerophospholipid biosynthesis; rat catheter biofilm repressed	75.7072	74.4654	70.0573	71.3319	71.0286	62.5428	69.2847	74.3857
orf19.1883	YCS4	Putative condensin complex subunit; cell-cycle regulated periodic mRNA expression	24.3456	24.117	23.8373	24.788	17.8913	15.539	16.6445	17.5941
orf19.1885	TAF4	Putative TFIID subunit; mutation confers hypersensitivity to toxic ergosterol analog	76.196	66.161	61.9305	59.6306	55.6009	58.3467	54.2039	52.6708
orf19.1886	RCL1	Putative U3-containing 90S preribosome processome complex subunit; Hap43-induced; essential; S. cerevisiae ortholog is essential; represses in core stress response;	71.3153	71.087	63.0141	65.4601	48.1568	45.5974	40.0055	42.4885
orf19.1887	orf19.1887	Protein of unknown function	37.6618	40.1738	40.5443	39.3577	34.7259	32.3557	34.9611	36.6148
orf19.1888	orf19.1888	Putative nicotinamide riboside hydrolase; cleaves N-glycosidic bonds in nucleosides; pyrimidine salvage and nicotinamide riboside salvage pathways; Spider biofilm induced	4.54799	5.33719	4.92644	4.87447	2.68336	2.983	2.99106	3.07861
orf19.1889	orf19.1889	Putative phosphoglycerate mutase family protein; stationary phase enriched protein; early-stage flow model biofilm induced; Spider biofilm repressed	133.931	142.926	107.285	105.782	117.888	108.031	110.995	112.105
orf19.1890	orf19.1890	Protein of unknown function	45.1272	40.5457	39.0742	41.8525	37.9912	39.7796	34.8832	37.8666
orf19.1891	APR1	Vacuolar aspartic proteinase; transcript equivalent in yeast-form and mycelial cells but is elevated at lower growth temperatures; upregulated iby human neutrophils; protein enriched in stationary phase; Spider biofilm induced	878.282	978.245	577.679	591.171	628.135	596.447	539.258	535.53
orf19.1893	orf19.1893	Protein of unknown function; Spider biofilm repressed	21.7403	23.1444	23.4395	24.4954	14.9268	17.3143	16.7494	17.8105
orf19.1896	SSC1	Heat shock protein; at yeast-form cell surface, not hyphae; antigenic; Gcn4-regulated; induced by amino acid starvation (3-AT) or by adherence to polystyrene; macrophage-repressed; sumoylation target; possibly essential	868.769	847.234	842.929	855.49	792.022	679.684	702.668	693.323
orf19.1897	orf19.1897	Protein of unknown function	21.6082	28.5724	32.3096	33.7143	17.3652	17.2844	17.7071	18.4933
orf19.190	orf19.190	Protein of unknown function	19.9906	22.1089	29.9418	28.6668	39.2783	37.1134	40.7438	36.7447
orf19.1900	orf19.1900	Protein of unknown function	40.0744	35.8008	34.581	40.549	25.5303	24.7846	22.3333	21.9932
orf19.1901	MCM3	Putative DNA replication protein; periodic mRNA expression, peak at cell-cycle M/G1 phase; Spider biofilm induced	58.8928	56.1816	51.056	52.6011	31.7178	28.2077	26.2961	23.9549
orf19.1902	NOC4	Putative nucleolar protein; Hap43-induced; mutation confers resistance to 5-fluorocytosine (5-FC), 5-fluorouracil (5-FU), and tubercidin (7-deazaadenosine); Spider biofilm induced	66.8538	65.4084	62.8835	64.423	45.227	50.6657	43.1052	41.034
orf19.1906	orf19.1906	Protein of unknown function; flow model biofilm induced	7.80522	7.4836	6.56373	3.71143	5.81563	8.96488	10.4873	8.30327
orf19.1907	EMC9	Ortholog of S. cerevisiae Nnf2; possible role in chromosome segregation; mutants are viable, induced during the mating process	96.4477	89.3051	83.7686	86.502	45.0114	45.177	40.55	40.3654
orf19.191	KIC1	Member of the GCK-III subfamily of eukaryotic Ste20p kinases; in RAM cell wall integrity signaling network; role in cell separation, azole sensitivity; required for hyphal growth; constitutive expression is MTL, white-opaque independent	38.9166	36.6536	34.1941	37.3591	30.5578	35.403	34.6431	32.4602
orf19.1910	orf19.1910	Predicted NADH-dependent flavin oxidoreductase; Hap43-repressed gene	126.902	133.679	97.4524	102.939	61.3258	65.011	51.288	51.4478
orf19.1911	PGA52	GPI-anchored cell surface protein of unknown function; Hap43p-repressed gene; fluconazole-induced; possibly an essential gene, disruptants not obtained by UAU1 method	395.02	375.757	202.945	219.122	185.694	136.919	113.079	113.222
orf19.1913	orf19.1913	Protein of unknown function; flow model biofilm induced	146.907	154.398	125.979	144.651	57.3225	66.4349	41.6553	47.0793
orf19.1914	FAV3	Putative alpha-1,6-mannanase; induced by mating factor in MTLa/MTLa opaque cells	38.1528	34.058	24.8567	30.8785	16.9209	13.8272	11.3858	11.2434
orf19.1915	MPP10	Putative SSU processome and 90S preribosome component; repressed in core stress response; repressed by prostaglandins	196.751	196.262	152.409	169.048	98.3772	83.6859	66.9633	60.2456
orf19.1917	orf19.1917	Protein of unknown function; Spider biofilm repressed	278.1	251.367	235.954	243.016	122.032	104.475	88.7207	96.5998
orf19.192	orf19.192	Protein of unknown function	21.9737	22.7294	14.2804	14.5888	22.033	21.6369	21.6425	21.045
orf19.1920	orf19.1920	Protein of unknown function	4.01009e-108	1.8905e-200	1.80275e-181	7.52553e-78	5.60074e-87	1.91961e-202	0	0
orf19.1923	RRN3	Protein with a predicted role in recruitment of RNA polymerase I to rDNA; caspofungin induced; flucytosine repressed; repressed in core stress response; repressed by prostaglandins	131.842	99.5064	118.801	135.467	51.8515	56.6854	43.0943	37.0985
orf19.1925	TLO5	Member of a family of telomere-proximal genes of unknown function; may be spliced in vivo	59.3861	62.9028	68.9212	74.5819	58.976	61.9364	55.9657	61.4946
orf19.1926	SEF2	Zn(II)2Cys6 transcription factor, required for normal resistance to copper; repressed by Sfu1 in high-iron conditions; regulated by Sef1, Sfu1, and Hap43; rat catheter and Spider biofilm induced	4.69608	5.07102	5.90863	6.65218	7.07998	6.51818	8.76624	8.48614
orf19.1927	SNM1	Protein similar to RNase MRP RNA binding protein; ciclopirox olamine induced; regulated by Sef1, Sfu1, and Hap43; Spider biofilm induced	14.3848	13.3039	18.405	15.9357	20.8663	21.0678	20.1761	18.3317
orf19.193	orf19.193	Protein of unknown function	4.69023	4.5163	4.74764	4.2208	5.95307	7.56644	8.34117	6.7938
orf19.1930	CFL5	Ferric reductase; induced in low iron; ciclopirox olamine, flucytosine induced; amphotericin B, Sfu1 repressed; Tbf1, Hap43 induced	1.00302	0.882232	0.37488	0.185477	0.103337	0.0229752	0.107507	0
orf19.1932	CFL4	C-terminus similar to ferric reductases; induced in low iron; Sfu1-repressed; ciclopirox olamine induced; colony morphology-related gene regulation by Ssn6; Hap43-repressed; Sef1-regulated	0.53403	0.516948	0.196476	0.138871	0.23211	0.123854	0.0965912	0.261628
orf19.1933	orf19.1933	Protein of unknown function	22.5346	24.8814	21.0222	21.2272	23.3186	21.9459	26.2814	24.3057
orf19.1934	HST3	Histone H3K56 deacetylase; reduced copy number increases opaque cell formation; repressed by MMS, hydroxyurea and high-levels of hydrogen peroxide; Hap43p-induced; ectopic expression blocks genotoxin-induced switching; nicotinamide target	28.8159	30.6303	31.1077	33.9792	23.7364	23.9555	26.1489	20.6966
orf19.1935	orf19.1935	Dubious open reading frame	2.31157	4.02774	6.19617	4.56842	2.71269	5.18238	7.63031	4.98286
orf19.1936	SNF1	Essential protein; functional homolog of S. cerevisiae Snf1p regulator of sugar metabolism; constitutively expressed; Thr208 phosphorylation may have regulatory role; up-regulation associated with azole resistance; has polyhistidine tract	111.547	113.511	102.123	109.083	72.6313	72.6584	71.1522	71.1399
orf19.1938	orf19.1938	Ortholog of S.pombe SPCC825.05c; a predicted splicing coactivator; transcription repressed in azole-resistant strain overexpressing CDR1 and CDR2; induced by benomyl treatment	23.7378	21.2884	23.7108	24.2045	22.2429	23.7101	23.4631	24.198
orf19.1939	orf19.1939	Protein of unknown function	12.6729	11.8958	11.3677	10.4817	14.3679	13.9654	15.7257	15.0512
orf19.194	orf19.194	Protein of unknown function	20.5927	25.6056	20.8424	18.4246	30.0818	35.2693	38.9325	38.8626
orf19.1940	orf19.1940	Protein of unknown function	138.409	153.053	141.245	142.594	175.829	173.888	164.141	166.885
orf19.1941	NUF2	Kinetochore component; amount of Nuf2p and Mtw1p protein detected at each centromere is consistent with a single kinetochore microtubule attachment site	12.0053	12.1218	13.8481	14.7198	13.1142	13.2399	14.1431	15.6563
orf19.1942	SGE1	Putative multidrug resistance factor; induced in low iron; regulated by Sef1, Sfu1, and Hap43	22.5175	20.1657	18.0566	20.0738	16.7239	19.6769	20.7219	17.1237
orf19.1943	orf19.1943	Protein of unknown function	2.18053	1.87625	0.833499	0.934742	3.05576	2.92192	3.46592	3.31487
orf19.1944	GPR1	Plasma membrane G-protein-coupled receptor of the cAMP-PKA pathway; required for WT hyphal growth; reports differ on role in cAMP-mediated glucose signaling; Gpr1 C terminus binds Gpa2; regulates HWP1 and ECE1; flow model biofilm induced	24.4852	22.9984	18.3149	17.9067	13.5895	13.534	14.891	14.7466
orf19.1945	AUR1	Inositolphosphorylceramide (IPC) synthase; catalyzes the key step in sphingolipid biosynthesis; antifungal drug target; flow model biofilm induced; Spider biofilm induced	38.228	29.8912	28.9035	27.2706	35.7926	40.3214	40.8074	38.6009
orf19.1946	orf19.1946	Similar to an aldose 1-epimerase-related protein; antigenic during murine systemic infection; protein present in exponential and stationary phase yeast cultures; Hap43-induced; Spider biofilm repressed	207.872	224.596	173.172	172.696	211.102	180.938	204.564	209.564
orf19.1948	orf19.1948	Protein of unknown function	23.1744	21.1002	32.9873	35.2405	17.1447	21.5496	19.3825	17.0489
orf19.1949	VPS1	Dynamin-family GTPase-related protein; induced upon adherence to polystyrene; regulated by Gcn2p and Gcn4p	126.57	121.911	102.966	109.247	105.004	83.3182	84.2077	83.0115
orf19.1950	orf19.1950	Protein of unknown function	54.2587	57.1861	35.0643	36.1932	52.8689	59.5435	53.222	56.8412
orf19.1953	orf19.1953	Predicted protein of unknown function; merged with orf19.1952 in Assembly 21	73.7864	65.8957	64.9186	67.9733	62.8413	66.7651	64.3391	66.8192
orf19.1954	PUS4	Putative pseudouridine synthase; transcript regulated by Nrg1, Mig1, and Tup1	54.084	45.0233	54.797	54.6314	47.5177	45.6922	48.7516	42.6363
orf19.1955	orf19.1955	Protein of unknown function	9.14698	8.88306	10.1124	11.2147	10.8637	13.6262	12.4624	12.3013
orf19.1956	orf19.1956	Protein of unknown function	50.9203	47.0211	56.1863	55.4578	36.4837	43.8131	39.7094	37.5217
orf19.1957	CYC3	Mitochondrial cytochrome c heme lyase; antigenic cell-wall protein; filament induced; induced on polystyrene adherence, interaction with macrophage; N-glycosylation, 2 heme-binding motifs; rat catheter, Spider biofilm induced	88.9991	86.4653	88.319	88.42	60.0633	69.1719	58.6228	48.3122
orf19.1958	orf19.1958	Dubious open reading frame	0	1.61327e-22	9.90698e-96	3.72323e-41	0.488552	1.32458e-24	1.92852e-38	0.544918
orf19.1959	orf19.1959	Protein of unknown function	47.4124	46.1033	50.2479	49.2716	42.946	46.0251	36.2594	36.9095
orf19.1960	CLN3	G1 cyclin; depletion abolishes budding and causes hyphal growth defects; farnesol regulated, functional in S. cerevisiae; possibly essential (UAU1 method); other biofilm induced; Spider biofilm induced	29.28	25.9847	22.0968	21.9285	24.4519	26.3668	27.5571	22.5953
orf19.1961	orf19.1961	Planktonic growth-induced gene	46.0523	42.091	54.6944	53.4634	62.8644	59.2038	65.1003	62.6665
orf19.1963	GDS1	Putative mitochondrial protein; Hap43-repressed gene; Spider biofilm induced	2.70808	3.02157	3.8936	2.71617	8.71711	8.71911	9.12269	9.05343
orf19.1964	orf19.1964	Protein of unknown function; repressed by fluphenazine treatment; induced by benomyl treatment and in an RHE model; regulated by Nrg1, Tup1	125.601	117.713	96.2177	90.5379	105.973	109.702	99.7613	100.221
orf19.1966	BUD23	Putative methyltransferase; Hap43-induced; repressed by prostaglandins	40.4855	43.3708	49.0261	45.565	40.6833	48.5753	40.4213	41.4934
orf19.1967	orf19.1967	Protein of unknown function	392.93	425.898	358.09	335.698	652.801	590.58	623.624	644.027
orf19.1968	orf19.1968	Protein of unknown function	25.8332	25.8622	22.0076	19.0667	53.6607	50.5715	57.3704	50.0958
orf19.1968.1	orf19.1968.1	Predicted non-catalytic subunit of N-terminal acetyltransferase; Spider biofilm induced	5.26316	6.89758	11.3629	11.0755	8.09449	8.48762	8.42118	9.79825
orf19.1969	CCW14	Putative mannoprotein of cell wall with role in response to stress; increased mRNA abundance observed in cyr1 homozygous mutant (hyphal or yeast-form cells) and in ras1 homozygous mutant (yeast-form cells)	37.9371	34.3359	51.3991	49.0097	34.5251	38.7294	35.749	36.5293
orf19.1970	orf19.1970	Putative vacuole biogenesis protein	120.266	117.871	92.1049	92.9895	125.55	110.74	104.962	118.22
orf19.1971	TRY3	RING-finger transcription factor; regulator of yeast form adherence; required for yeast cell adherence to silicone substrate; Spider biofilm induced	41.0505	37.6873	40.7874	39.6549	28.1441	28.2307	27.4722	25.9172
orf19.1972	orf19.1972	Protein of unknown function	69.652	69.6644	56.9024	61.2978	59.9819	47.9423	49.6985	47.7338
orf19.1973	HAP5	Component of CCAAT-binding transcription factor; roles in filamentous growth, low-iron induction of FRP1; regulates genes involved in respiratory growth; functional homolog of S. cerevisiae Hap5p; Cap1p-dependent expression in low iron	63.5902	62.8398	61.5462	69.0639	33.8225	37.0509	31.8386	26.595
orf19.1974	TFS1	Putative carboxypeptidase y inhibitor; transcript regulated upon yeast-hypha switch; colony morphology-related gene regulation by Ssn6	583.463	577.702	406.398	413.406	636.317	575.523	567.033	519.132
orf19.1975	orf19.1975	Protein of unknown function	30.6905	33.4581	37.0928	32.3094	85.9671	92.8743	98.6281	87.9481
orf19.1976	TRX2	Similar to thioredoxins; not expected to be enzymatically active because it lacks a canonical thioredoxin active site (Trp-Cys-Gly-Pro-Cys); TRX1 encodes all of the cytoplasmic/nuclear thioredoxin function in C. albicans; Hap43p-induced	14.787	18.5986	11.7983	8.93739	34.5003	30.8768	36.7987	29.293
orf19.1977	URA4	Dihydroorotase; protein present in exponential and stationary growth phase yeast cultures	75.4407	77.1469	101.717	94.8341	105.83	111.647	107.682	107.826
orf19.1978	GIT2	Putative glycerophosphoinositol permease; fungal-specific; repressed by alpha pheromone in SpiderM medium; Hap43-repressed; Spider biofilm induced	15.6743	15.0441	17.3963	19.335	22.2141	18.6787	22.6496	20.2111
orf19.1979	GIT3	Glycerophosphocholine permease; white cell specific transcript; fungal-specific; alkaline repressed; caspofungin, macrophage/pseudohyphal-repressed; flow model biofilm induced; Spider biofilm induced	76.2921	77.4868	68.2811	75.7887	76.7793	68.8868	84.6696	98.543
orf19.198	ASN1	Putative asparagine synthetase; soluble protein in hyphae; regulated by Rim101; decreased expression at pH 4 vs pH 8; protein detected during exponential and stationary phases of yeast-form growth	250.738	243.5	357.28	355.902	218.905	205.326	214.505	221.024
orf19.1980	GIT4	Glycerophosphocholine transporter; fungal-specific (no human or murine homolog); possibly an essential gene, disruptants not obtained by UAU1 method; Hap43p-repressed gene	1.229	1.65946	1.07326	1.33737	2.07094	1.78329	1.91513	2.22314
orf19.1981	IMP2	Predicted subunit of the mitochondrial inner membrane peptidase complex involved in protein targeting to mitochondria	35.5078	34.2724	31.8074	31.6885	41.3338	42.6476	44.7705	45.9852
orf19.1985	orf19.1985	Has aminoglycoside phosphotransferase and protein kinase domains; rat catheter and flow model biofilm induced	2.00969	2.6087	2.60748	2.29349	3.27434	3.48018	3.86346	3.55571
orf19.1986	ARO2	Putative chorismate synthase; fungal-specific (no human or murine homolog); protein level decreased in stationary phase yeast cultures; GlcNAc-induced protein	179.778	199.57	202.114	212.46	113.238	114.296	116.978	124.982
orf19.1988	CDC45	Putative DNA replication initiation factor; transcriptionally regulated by interaction with macrophage	24.2117	24.2027	25.3483	24.9476	17.1199	16.582	17.3993	16.9724
orf19.1989	DCW1	Protein with predicted GPI modification; dfg5 dcw1 double mutant is inviable; not required for wild-type hyphal growth; upregulated in cyr1 mutant (yeast or hyphal form); Hap43-induced	115.241	110.352	95.8318	103.5	76.036	72.8598	68.3346	75.6462
orf19.199	orf19.199	Protein of unknown function; hyphal-induced expression; upregulated in a cyr1 null mutant	24.1923	21.598	23.5025	21.7666	28.1208	31.9227	35.4312	34.9146
orf19.1990	SNX4	Putative sorting nexin; induced during the mating process	23.6475	26.5696	25.4037	24.1993	35.5516	40.0077	42.9448	41.171
orf19.1991	orf19.1991	Protein of unknown function	44.5225	45.494	52.871	51.8363	60.8785	58.0274	60.686	62.7283
orf19.1992	SIR2	Required for wild-type lifespan, asymmetric inheritance of oxidatively damaged proteins, rDNA silencing; regulates phenotypic switch in strain 3153A, not WO-1; partially complements S. cerevisiae sir2 mating defect; Spider biofilm induced	7.85512	8.21031	7.6999	7.77969	8.84745	8.8817	9.72751	10.3503
orf19.1993	orf19.1993	Protein of unknown function	0.41526	0.00177581	1.93558	4.86594	12.663	23.7927	26.1699	35.1068
orf19.1994	orf19.1994	Protein of unknown function	12.0739	12.3566	15.0056	15.8562	12.5328	15.1328	17.8315	17.1697
orf19.1995	MNN24	Alpha-1,2-mannosyltransferase; required for normal cell wall mannan content	18.6177	18.7798	17.4918	15.0522	19.5013	20.9223	21.6042	21.8517
orf19.1996	CHA1	Similar to catabolic ser/thr dehydratases; repressed by Rim101; induced in low iron; regulated on white-opaque switch; filament induced; Tn mutation affects filamentation; flow model biofilm induced; Spider biofilm repressed	243.159	242.092	293.166	297.261	193.893	207.495	206.648	222.794
orf19.1998	orf19.1998	Protein of unknown function	28.2538	28.3731	25.0529	23.8602	27.8821	26.5047	28.5535	27.4292
orf19.1999	orf19.1999	Protein of unknown function; transcript detected on high-resolution tiling arrays	43.0237	52.0732	63.0163	50.5016	50.8238	56.5654	50.6075	54.8304
orf19.20	RTS1	Putative serine/threonine-protein phosphatase B-type regulatory subunit; transcription is regulated upon yeast-hyphal switch	50.9982	51.6962	55.6822	54.2842	43.8042	45.8409	47.9225	48.2889
orf19.200	orf19.200	Putative nuclear RNA-binding protein; Spider biofilm repressed	246.653	237.835	241.501	238.631	241.723	289.833	284.705	293.91
orf19.2000	orf19.2000	Protein of unknown function	10.7475	10.4211	11.0159	11.5695	8.96476	10.6425	9.08963	8.98465
orf19.2001	orf19.2001	Protein of unknown function	14.4423	15.0073	18.411	14.6971	28.7231	34.8178	36.2714	39.7306
orf19.2002	orf19.2002	Protein of unknown function	14.6795	14.1595	19.4612	17.5887	23.8487	29.1815	33.1769	29.428
orf19.2003	HNM1	Putative choline/ethanolamine transporter; mutation confers hypersensitivity to toxic ergosterol analog; colony morphology-related gene regulation by Ssn6; clade-associated gene expression	17.9773	18.5195	17.8062	17.6544	15.0426	16.4592	16.7611	17.9644
orf19.2005	REG1	Putative protein phosphatase regulatory subunit; Hap43-repressed gene; macrophage/pseudohyphal-induced; possibly regulated upon hyphal formation; flow model biofilm induced	46.1083	41.4693	43.0933	44.4247	40.6184	37.4566	34.3413	31.2634
orf19.2006	orf19.2006	Protein of unknown function	12.7908	15.36	10.6358	13.1166	18.4768	21.9572	20.3036	22.2393
orf19.2006.1	COX17	Putative copper metallochaperone; Hap43p-repressed gene; rat catheter biofilm induced; Spider biofilm induced	56.1381	59.5263	75.8563	64.4947	130.156	198.405	166.18	198.533
orf19.2007	orf19.2007	Protein of unknown function	21.5593	19.276	29.5644	28.3579	18.9114	20.2277	22.0136	20.5649
orf19.2008	orf19.2008	Protein of unknown function	28.8651	33.6805	48.281	47.7787	46.0087	57.5213	59.6186	58.2065
orf19.2009	PEX12	Protein of unknown function	25.4352	27.7541	24.3165	23.4539	50.4899	45.0971	53.5566	49.4448
orf19.201	orf19.201	Protein of unknown function; unmerged from orf19.202 in a revision of Assembly 21	24.4763	32.1536	19.0095	18.6911	34.5725	35.6841	40.0143	42.3399
orf19.2010	orf19.2010	Protein of unknown function	0.746043	1.15549	0.627379	1.24162	1.29704	1.3842	0.539754	1.46198
orf19.2012	NOT3	Transcriptional regulator; not required for buccal epithelial cell adherence or virulence in mouse systemic infection; null mutant colonies exhibit slightly decreased filamentation ratio; required for yeast adherence to silicone substrate	47.861	43.4193	57.8879	60.6964	42.8943	40.3603	40.3268	40.3467
orf19.2013	KAR2	Similar to Hsp70 family chaperones; role in translocation of proteins into the ER; induced in high iron; protein present in exponential and stationary growth phase yeast cultures; flow model and Spider biofilm repressed	733.908	684.785	866.847	895.521	824.971	670.674	767.479	824.198
orf19.2014	BCY1	Protein kinase A regulatory subunit; required for nuclear localization of Tpk1; physically interacts with Tpk1; essential; apoptosis-regulated; bcy1 heterozygous or bcy1 tpk2 mutant has filamentous growth defect	191.029	185.431	170.307	167.677	178.566	166.451	170.794	169.312
orf19.2016	ERG28	Protein of unknown function	96.8019	86.8094	117.085	110.76	195.944	198.946	215.904	193.763
orf19.2017	orf19.2017	Protein of unknown function	116.855	119.598	143.439	140.077	94.8356	110.312	106.969	102.681
orf19.2018	orf19.2018	Protein with a predicted DnaJ chaperone domain and a CSL-type zinc finger; Spider biofilm induced	18.301	16.106	27.858	26.988	25.4538	25.2159	23.2408	22.6984
orf19.2018.1	orf19.2018.1	PProtein of unknown function; gene has intron; similar to human BLOC1S2	29.622	27.4888	15.1354	15.289	29.4656	39.655	33.9101	28.51
orf19.2018.2	orf19.2018.2	Protein of unknown function	70.7935	69.6712	84.6488	91.1262	76.1548	90.987	72.0258	71.9664
orf19.2019	orf19.2019	Protein of unknown function	127.634	142.453	147.865	136.449	146.662	136.977	141.05	139.627
orf19.202	CDC47	Phosphorylated protein described as having role in control of cell division; RNA abundance regulated by tyrosol and cell density; merged with orf19.201 in Assembly 20; unmerged from orf19.201 in a revision of Assembly 21	62.1389	59.6015	69.4014	70.2906	32.0393	31.0893	30.9305	34.3216
orf19.2020	HGT6	Putative high-affinity MFS glucose transporter; 20 family members; induced in core stress response; fluconazole, oralpharyngeal candidasis induced; flow model biofilm induced; Spider biofilm induced	312.214	300.737	339.244	351.394	372.088	329.043	364.908	366.889
orf19.2021	HGT8	High-affinity glucose transporter of the major facilitator superfamily; 20 members in the C. albicans glucose transporter family; 12 probable membrane-spanning segments; gene has intron; expressed in rich medium; flow model biofilm induced	189.999	206.021	88.7096	90.2793	53.5368	47.315	38.2902	38.9434
orf19.2023	HGT7	Putative MFS glucose transporter; glucose, fluconazole, Snf3 induced, expressed at high glucose; 20 member C. albicans glucose transporter family; 12 TM regions predicted; flow model biofilm induced; Spider biofilm repressed	2172.14	2209.14	1524.38	1540.93	1679.88	1321.37	1301.75	1305.63
orf19.2024	orf19.2024	Protein of unknown function	0.617728	0.318917	1.55842	2.05614	1.07396	0.955106	1.78768	1.69474
orf19.2025	orf19.2025	Dubious open reading frame	0.504801	0	0	0	0.7021	0	0.730436	0.791386
orf19.2026	UBP13	Ortholog of S. cerevisiae Ubp13; putative ubiquitin carboxyl-terminal hydrolase; flow model biofilm induced; rat catheter biofilm repressed	29.4408	28.8791	27.3918	29.4767	24.525	25.2007	26.2852	24.9187
orf19.2028	MXR1	Putative methionine sulfoxide reductase; Plc1-regulated; induced by human neutrophils, flucytosine; macrophage regulated (gene induced, protein decreased); possibly adherence-induced; Spider biofilm induced	156.159	161.124	215.012	216.481	138.018	162.525	164.99	166.535
orf19.2029	RFC5	Putative heteropentameric replication factor C subunit; periodic mRNA expression, peak at cell-cycle G1/S phase	34.7985	36.7556	46.2733	49.0555	50.2681	45.965	56.6107	48.5044
orf19.203	STB3	Putative SIN3-binding protein 3 homolog; caspofungin induced; macrophage/pseudohyphal-repressed; rat catheter biofilm induced	15.0041	15.0526	13.0554	13.3126	12.6066	12.441	12.9442	12.5773
orf19.2030	orf19.2030	Plasma membrane-associated protein; induced in cyr1 or ras1 mutant; induced by hypoxia, ketoconazole and during growth in the mouse cecum; induced in oralpharyngeal candidasis; Spider biofilm induced	114.485	122.821	73.3885	72.177	80.0816	74.318	75.0508	74.1269
orf19.2031	VPS24	Protein similar to S. cerevisiae Vps24p, which is a member of the ESCRT III protein sorting complex; downregulated upon adherence to polystyrene	17.7366	17.2087	14.8726	13.4445	20.4865	22.853	22.272	22.5724
orf19.2032	orf19.2032	Protein of unknown function; rat catheter biofilm induced	16.6676	16.0711	13.2511	14.3205	22.8173	26.6129	26.795	27.684
orf19.2033	PGA19	Putative GPI-anchored protein; macrophage-induced gene; mutants are viable	0.947083	0.152243	0.83691	0.3666	1.29524	1.46976	1.02427	1.324
orf19.2034	orf19.2034	Protein of unknown function	0	0.152245	0.123993	0	0.205074	0	0	0
orf19.2035	orf19.2035	Protein of unknown function	1.71297	2.75135	2.24079	1.82138	2.3163	2.11882	2.27208	1.04435
orf19.2036	orf19.2036	Predicted dihydrodiol dehydrogenase; ortholog of S. pombe SPAC513.06c; flow model and rat catheter biofilm repressed	46.3988	46.4385	46.3308	46.0328	52.2316	53.776	57.485	59.6377
orf19.2037	orf19.2037	Protein of unknown function	55.9836	58.9618	74.28	69.2578	77.6049	99.4088	97.7485	95.568
orf19.2038	orf19.2038	Protein of unknown function; Spider biofilm induced	1.12245	2.01298	1.09296	1.81891	4.1494	4.09211	4.91524	4.07508
orf19.2039	MSF1	Putative phenylalanine-tRNA ligase; protein level decreases in stationary phase cultures; Hap43p-repressed gene	83.6215	79.624	75.7444	74.0069	77.9864	68.4222	64.2467	70.5362
orf19.204	orf19.204	Protein of unknown function	10.7296	9.99644	12.4159	13.3685	11.0902	10.0916	12.2929	10.57
orf19.2040	orf19.2040	Protein of unknown function	24.3667	22.4198	25.6535	24.2177	20.4756	23.3182	21.0281	22.8127
orf19.2041	orf19.2041	Protein of unknown function	29.6989	29.499	41.0848	41.5656	22.202	24.8675	25.9491	25.6833
orf19.2042	orf19.2042	Protein of unknown function	16.8836	16.508	18.332	20.3705	14.3231	16.1133	16.6178	17.893
orf19.2043	orf19.2043	Protein of unknown function	9.69862	10.8952	7.98429	4.39838	15.9868	16.1326	17.5453	6.80271
orf19.2044	PGA27	Putative GPI-anchored protein	6.50558	6.51376	7.21152	7.75119	6.20354	6.12664	6.7035	5.52442
orf19.2045	orf19.2045	Protein of unknown function	63.7379	60.7547	61.8382	68.5376	61.8613	61.1116	58.4953	55.9816
orf19.2046	POT1-2	Putative peroxisomal 3-ketoacyl CoA thiolase; Hap43-repressed	17.1356	17.9372	13.4123	11.989	14.251	14.1074	15.1453	13.6039
orf19.2047	orf19.2047	Putative protein of unknown function; Hap43p-repressed gene; mutation confers hypersensitivity to toxic ergosterol analog, and to amphotericin B	43.0818	46.432	36.9093	36.6361	69.6038	62.6206	61.8858	72.889
orf19.2048	orf19.2048	Proten of unknown function; transcript positively regulated by Sfu1; Hap43 repressed; Spider biofilm induced	227.407	249.665	114.777	119.491	727.986	864.988	723.716	739.812
orf19.2049	orf19.2049	Plasma membrane-associated protein; heterozygous null mutant displays sensitivity to virgineone; Spider biofilm induced	5.43012	5.0566	3.65175	3.96842	15.1668	18.0569	15.8422	10.7127
orf19.2050	orf19.2050	Protein of unknown function	68.7242	66.8733	56.3716	55.8184	67.2805	73.0124	69.2557	72.4196
orf19.2051	orf19.2051	Protein of unknown function	22.1027	20.1356	26.1302	26.8051	13.1478	13.0261	13.6247	13.7127
orf19.2054	FGR15	Putative transcription factor with zinc finger DNA-binding motif; lacks an ortholog in S. cerevisiae; transposon mutation affects filamentous growth; caspofungin induced; mutation causes marginal increase in caspofungin sensitivity	20.1127	19.4837	20.7594	19.175	18.1551	16.1185	17.1211	16.74
orf19.2055	NPL6	Putative nuclear protein localization factor; Hap43-induced; Spider biofilm repressed	75.031	68.3333	73.6541	70.9036	70.7495	67.8122	60.0779	61.5045
orf19.2057	orf19.2057	Protein of unknown function	58.2656	55.8336	50.3121	53.4802	54.5254	44.7488	48.4889	49.1523
orf19.2059	orf19.2059	Protein with homology to magnesium-dependent endonucleases and phosphatases; regulated by Sef1, Sfu1, and Hap43; Spider biofilm induced	11.136	10.5573	9.39747	9.35581	9.99364	11.8211	12.0644	9.0884
orf19.206	orf19.206	Putative adhesin-like protein	24.1416	20.981	18.5339	20.3364	12.9347	12.4751	12.5658	10.968
orf19.2060	SOD5	Cu and Zn-containing superoxide dismutase; protects against oxidative stress; induced by neutrophils, hyphal growth, caspofungin, osmotic/oxidative stress; oralpharyngeal candidiasis induced; rat catheter and Spider biofilm induced	0.82887	0.855848	2.34456	1.50487	1.83405	1.44467	1.74452	2.12635
orf19.2061	orf19.2061	Protein of unknown function	0	1.24251	0	0	0	0	0	0
orf19.2062	SOD4	Cu and Zn-containing superoxide dismutase; role in response to host innate immune ROS; regulated on white-opaque switch; ciclopirox olamine induced; caspofungin repressed; SOD1,4,5,6 gene family; yeast-associated; Spider biofilm induced	37.7032	43.8471	23.8945	23.2546	39.1938	37.9945	33.6032	37.0802
orf19.2063	orf19.2063	Protein of unknown function	21.4009	19.5016	18.9385	19.2325	15.676	15.9534	16.5685	16.8747
orf19.2064	orf19.2064	Putative transcription factor with zinc finger DNA-binding motif	9.73192	9.51367	8.67653	8.13578	9.36839	7.16131	7.5136	7.89334
orf19.2065	orf19.2065	Protein of unknown function	26.4684	27.832	35.1614	29.7359	31.4349	21.1512	20.4168	23.7431
orf19.2066	orf19.2066	Protein of unknown function	16.6723	18.4816	15.951	15.5025	12.4744	9.59652	5.77603	6.31353
orf19.2066.1	ATP18	F1F0 ATP synthase complex subunit; gene has intron	102.627	108.673	110.109	114.354	125.264	203.373	199.279	128.101
orf19.2067	orf19.2067	Protein with a predicted role in mitochondrial iron metabolism; Hap43-repressed; expression upregulated during growth in the mouse cecum; Spider biofilm induced	16.8164	18.8175	25.4361	25.7221	24.6059	25.0335	28.8528	27.0143
orf19.2068	orf19.2068	Protein of unknown function	18.0473	17.8893	19.6691	18.542	17.6377	18.5134	19.7771	19.2771
orf19.2069	SMF3	Putative vacuolar iron transporter; alkaline upregulated; caspofungin repressed; induced by Mnl1 under weak acid stress; Hap43-repressed	41.3423	40.4019	37.0082	41.3205	32.7094	33.5048	34.2911	31.0961
orf19.207	PGA55	GPI-anchored adhesin-like protein; filament induced; regulated by Nrg1, Tup1; regulated upon hyphal formation; mRNA binds to She3 and is localized to yeast-form buds and hyphal tips; induced during chlamydospore formation	3.34222	4.26985	1.9212	2.82239	0.868035	0.642201	1.19842	0.522102
orf19.2070	orf19.2070	Protein of unknown function	39.6978	38.62	46.1078	45.0946	34.9074	33.2525	33.0567	34.2826
orf19.2071	orf19.2071	Protein of unknown function; induced by alpha pheromone in SpiderM medium	0.26248	0	1.10365	1.0921	0.547605	0.974008	0.759607	1.85173
orf19.2072	orf19.2072	Protein of unknown function	6.04304	5.45362	5.32193	5.3058	5.95407	7.20995	5.85238	5.52016
orf19.2073	orf19.2073	Protein with a multidrug and toxin extrusion protein domain; induced by Mnl1 under weak acid stress	41.0573	36.5206	27.8909	29.0322	26.3516	23.4106	21.9669	22.1358
orf19.2074	orf19.2074	Protein of unknown function	26.5416	38.3676	26.2259	28.7121	15.689	21.7499	14.4019	18.2043
orf19.2075	DFG5	N-linked mannoprotein of cell wall and membrane; possible signal transducer; role in hyphal growth and HWP1 induction in alkaline pH; GPI modification predicted; dfg5 dcw1 double mutant is inviable; caspofungin-induced, fungal-specific	76.5266	76.6074	57.0462	60.2094	43.3068	40.8792	42.7193	43.7148
orf19.2076	orf19.2076	Protein of unknown function; S. pombe ortholog SPAC7D4.05 encodes a predicted hydrolase; Hap43-repressed; Spider biofilm induced	20.1969	20.7059	18.556	18.4813	20.4933	20.8037	21.5804	23.8882
orf19.2077	ZCF9	Putative Zn(II)2Cys6 transcription factor; hypersensitive to toxic ergosterol analog ECC69 and/or ECC1384	16.537	15.2669	11.275	11.8498	9.04442	10.0855	9.40944	8.19168
orf19.2078	orf19.2078	Protein of unknown function	25.8901	27.2836	25.9291	25.3025	25.9681	26.1736	27.7109	27.9045
orf19.2079	PHHB	Putative 4a-hydroxytetrahydrobiopterin dehydratase; transposon mutation affects filamentous growth; flow model biofilm induced; Spider biofilm induced	47.9097	50.9822	42.8512	36.0066	55.9638	71.9039	70.0501	73.7308
orf19.2081	POM152	Putative nuclear pore membrane glycoprotein	39.1809	37.9399	42.3308	41.8717	29.0347	27.3876	27.1211	26.3547
orf19.2082	SAP30	Aspartic-type endopeptidase; involved in degradation of alpha pheromone; functional equivalent of S. cerevisiae Bar1; a-cell specific; induced by alpha pheromone	1.81746	1.94363	1.74671	2.53863	2.48266	3.13123	2.11325	2.39135
orf19.2084	CDH1	Protein involved in regulation of mitosis; similar to S. cerevisiae Cdh1, which is an APC/C component; transcriptionally induced by Mnl1 under weak acid stress	29.1609	27.392	23.7265	25.358	18.1836	17.173	20.3514	19.2231
orf19.2087	SAS2	Predicted histone acetyltransferase involved in histone H4 acetylation; member of MYST family	17.7847	18.9782	23.216	23.7779	13.8168	15.4633	17.0125	16.7405
orf19.2088	DPB4	Putative DNA polymerase epsilon subunit D; null mutant is viable but slow-growing and displays abnormal invasive growth on SD and YPD media; Spider biofilm repressed	99.0408	83.8335	99.6098	96.6201	84.1206	77.4909	70.84	77.6341
orf19.2089	orf19.2089	Ortholog of Nyv1, v-SNARE component of the vacuolar SNARE complex involved in vesicle fusion in S. cerevisiae; Hap43-repressed gene	45.8277	46.6104	43.9511	44.7764	52.937	55.7833	60.6616	58.5927
orf19.209	DFG10	Protein of unknown function	16.226	18.9864	26.2866	24.5531	23.2459	19.647	22.8151	28.148
orf19.2090	orf19.2090	Ortholog of S. cerevisiae Ecm16, an essential DEAH-box ATP-dependent RNA helicase specific to the U3 snoRNP required for 18S rRNA synthesis; Hap43-induced; Spider biofilm induced	66.035	58.3396	55.724	59.1234	41.334	39.2836	34.6832	29.4311
orf19.2091	orf19.2091	Putative NADH dehydrogenase; repressed by nitric oxide, Hap43p-repressed	134.748	133.751	179.001	182.421	170.823	181.592	177.398	177.655
orf19.2092	orf19.2092	Putative peroxisomal cystathionine beta-lyase; Gcn4p-regulated	65.4438	62.4271	69.2369	69.5855	56.8073	54.1113	53.7967	56.7688
orf19.2093	RFA1	Putative DNA replication factor A; RNA abundance regulated by cell cycle, tyrosol and cell density	143.681	140.445	132.671	134.787	111.248	99.2094	95.9979	99.3536
orf19.2094	PDR6	Putative pleiotropic drug resistance regulatory protein 6; transcript regulated by Nrg1; induced by alpha pheromone in SpiderM medium	23.4398	24.3565	23.1568	22.7904	23.7084	21.53	24.5933	22.7917
orf19.2095	orf19.2095	Protein of unknown function	99.495	100.647	80.3005	82.0108	85.3745	72.0268	65.254	69.716
orf19.2097	orf19.2097	Predicted DNA-dependent ATPase/helicase; Spider biofilm induced	14.3018	13.6768	12.7381	13.9561	10.3961	8.80754	9.50241	10.081
orf19.2098	ARO8	Aromatic transaminase of the Ehrlich fusel oil pathway of aromatic alcohol biosynthesis; Rim101 independent alkaline induction; protein abundance affected by URA3 expression in CAI-4 strain; Gcn4-regulated; stationary phase enriched	328.041	301.827	427.979	448.337	221.16	188.372	189.483	207.738
orf19.2099	HIR1	Component of the HIR complex, a nucleosome assembly factor involved in chromatin formation; involved in regulation of white-opaque switching frequency	27.0232	24.9378	20.9354	20.7589	20.2903	17.252	15.527	18.8109
orf19.21	orf19.21	Protein of unknown function	11.6223	11.2462	16.2522	15.5294	17.3194	17.7851	19.556	16.9711
orf19.210	orf19.210	Protein of unknown function	6.8445	5.99648	6.36629	6.42909	5.52621	5.00973	6.03985	5.93416
orf19.2101	orf19.2101	Protein of unknown function	114.288	127.368	123.063	120.877	102.819	122.877	108.993	118.855
orf19.2102	CKB1	Regulatory subunit of protein kinase CK2 (casein kinase II), beta subunit; null mutants are hypersensitive to caspofungin and hydrogen peroxide medium	43.5444	39.2972	48.3763	49.93	37.0057	32.7313	31.0078	31.8214
orf19.2103	orf19.2103	Protein of unknown function	119.723	129.405	143.084	141.341	108.481	94.835	106.459	107.252
orf19.2104	orf19.2104	Protein of unknown function	34.3297	33.2675	37.4744	40.2157	30.2863	32.7906	31.2675	31.0028
orf19.2105	orf19.2105	Putative pre-mRNA-splicing factor; possibly an essential gene, disruptants not obtained by UAU1 method	29.6413	29.3439	25.9545	29.8785	20.8257	20.9779	17.4656	20.1207
orf19.2106	orf19.2106	Putative protein of unknown function; Hap43p-repressed gene	39.4357	42.1607	40.5001	41.3345	31.7121	28.6344	25.754	27.2647
orf19.2107	MUQ1	Putative choline phosphate cytidylyltransferase/phosphoethanolamine cytidylyltransferase; repressed in hyphae compared vs yeast; Hap43-repressed; flow model biofilm induced; Spider biofilm repressed	169.724	160.523	136.148	138.472	104.387	90.1224	77.8441	73.1055
orf19.2107.1	STF2	Protein involved in ATP biosynthesis; repressed in hyphae; repressed by Efg1, Hap43; transcript upregulated in clinical isolates from HIV+ patients with oral candidiasis; rat catheter, flow model and Spider biofilm induced	1126	1547.76	800.342	804.904	1019.53	1142.37	938.156	1293.65
orf19.2108	SOD6	Copper- and zinc-containing superoxide dismutase; gene family includes SOD1, SOD4, SOD5, and SOD6; gene may contain an intron; Hap43-repressed; flow model and rat catheter biofilm induced	5.66755	4.16856	3.19915	2.90723	4.91318	4.12938	3.87573	4.25999
orf19.211	orf19.211	Predicted homeodomain-like transcription factor; also has a metal-binding Ada DNA repair protein domain; Spider biofilm induced	14.968	16.3245	16.206	15.9585	16.3128	17.981	14.5517	14.7394
orf19.2110	orf19.2110	Protein of unknown function	26.051	24.8835	25.726	25.5893	25.0694	24.3398	24.8419	23.9798
orf19.2111	orf19.2111	Protein of unknown function	69.7497	67.053	60.2021	59.2775	46.341	45.4127	45.7546	47.41
orf19.2111.2	RPL38	60S ribosomal ribosomal protein subunit; genes encoding cytoplasmic ribosomal subunits, translation factors, tRNA synthetases are downregulated upon phagocytosis by murine macrophage	4114.43	4828.14	5715	5312.08	3690.61	4991.43	3917.75	5008.89
orf19.2112	orf19.2112	snRNP U5 splicing factor component; involved in positioning the 3' splice site during the 2nd catalytic step of splicing; Spider biofilm induced	45.3834	53.1293	55.6712	57.9442	37.0346	33.4747	28.5258	31.2969
orf19.2113	orf19.2113	Putative integral peroxisomal membrane protein; Hap43p-repressed gene	87.3791	87.6239	84.9121	91.2849	64.4612	62.4134	61.0324	65.7743
orf19.2114	orf19.2114	Predicted uricase; ortholog of S. pombe SPCC1223.09; Spider biofilm induced	120.808	121.738	63.9685	64.1573	93.0791	88.2894	82.5173	70.2871
orf19.2115	orf19.2115	Putative molybdopterin-converting factor; fungal-specific (no human or murine homolog)	87.4671	90.698	93.7288	98.1122	56.645	49.9164	47.0014	48.0079
orf19.2116	NAT2	Putative N-terminal acetyltransferase; Hap43p-repressed gene; mutation confers hypersensitivity to toxic ergosterol analog	190.021	189.212	168.891	172.067	132.806	120.388	118.563	128.55
orf19.2117	LEU5	Putative mitochondrial carrier protein; Hap43-repressed; rat catheter biofilm induced	31.4908	32.3121	37.5391	36.8726	24.8712	28.0958	25.3042	22.52
orf19.2119	NDT80	Ortholog of Ndt80; meiosis-specific transcription factor; activator of CDR1 induction by antifungal drugs; required for wild-type drug resistance and for Spider biofilm formation; transcript induced by antifungal drug treatment	223.871	175.652	175.524	205.985	68.1246	77.9722	57.5926	51.59
orf19.212	VPS28	ESCRT I protein sorting complex subunit; involved in Rim8 processing and proteolytic activation of Rim101, which regulates pH response; role in echinocandin, azole sensitivity	15.9444	16.8376	19.6554	17.0373	17.9552	21.0668	21.8915	19.5285
orf19.2124	orf19.2124	Predicted alcohol dehydrogenase; Spider biofilm induced	35.83	31.489	33.2779	35.4707	41.9072	39.7968	37.9348	35.7393
orf19.2125	orf19.2125	Protein of unknown function; GlcNAc-induced protein; Spider biofilm induced; rat catheter biofilm repressed	378.792	461.28	592.422	563.798	387.934	457.308	378.163	458.695
orf19.2127	CST5	Scaffold protein for the mitogen-activated protein (MAP) kinase cascade that regulates mating; required for opaque mating or white biofilm formation in response to mating pheromone; induced in response to pheromone; Hap43p-repressed	18.9765	17.0925	14.5835	17.5649	17.3973	14.7508	14.7413	14.3142
orf19.2128	orf19.2128	Protein of unknown function	46.8579	47.1983	45.2655	47.3047	36.6845	28.389	27.1428	30.5884
orf19.2129	orf19.2129	Ortholog of S. cerevisiae Spo71; a meiosis-specific protein required for spore wall formation during sporulation in S. cerevisiae; possibly an essential gene, disruptants not obtained by UAU1 method	16.4316	18.1447	16.5529	17.8988	12.5776	11.3268	12.0326	13.1708
orf19.213	orf19.213	Protein of unknown function	205.013	213.276	221.39	198.115	225.039	266.193	282.361	287.459
orf19.2131	orf19.2131	Protein of unknown function	72.6532	69.3618	56.1942	60.8573	52.4183	44.3192	45.9817	46.1525
orf19.2132	orf19.2132	Protein of unknown function	150.622	144.472	115.968	118.841	140.216	115.898	116.081	127.248
orf19.2133	LIP4	Secreted lipase, member of a differentially expressed lipase gene family with possible roles in nutrition and/or in creating an acidic microenvironment; expressed more strongly during mucosal infections than during systemic infections	0	3.3233e-11	0	0	0	2.34797e-10	3.69669e-10	0
orf19.2135	TSM1	Putative transcription initiation factor TFIID subunit; transcript is upregulated in clinical isolates from HIV+ patients with oral candidiasis; Nrg1-regulated	30.9395	29.4216	26.4786	28.149	21.8804	19.243	20.3877	19.3142
orf19.2137	orf19.2137	Protein of unknown function	26.341	21.0412	25.6832	28.0463	16.8757	14.7837	13.9179	15.8109
orf19.2138	ILS1	Putative isoleucyl-tRNA synthetase, the target of drugs including the cyclic beta-amino acid icofungipen/PLD-118/BAY-10-8888 and mupirocin; protein present in exponential and stationary growth phase yeast cultures	362.545	341.873	389.177	405.2	212.816	182.412	173.027	183.67
orf19.2143	orf19.2143	Protein of unknown function	92.5891	87.9096	87.6954	91.7088	40.443	40.4002	37.4352	30.8262
orf19.2146	HAT2	Putative Hat1-Hat2 histone acetyltransferase complex subunit; role in DNA damage repair and morphogenesis; mutations cause constitutive pseudohyphal growth, caspofungin sensitivity; rat catheter and Spider biofilm repressed	77.7365	73.9231	78.6799	86.3119	50.2968	51.9546	46.2724	43.6579
orf19.2149	orf19.2149	Putative sulfate permease; <IS. cerevisiae</I ortholog YPR003C localizes to the endoplasmic reticulum; regulated by Sef1p-, Sfu1p-, and Hap43p	49.4615	43.1974	40.2453	42.278	26.9214	25.6621	24.1809	23.6024
orf19.215	orf19.215	Component of a complex containing the Tor2p kinase; possible a role in regulation of cell growth; Spider biofilm induced	18.9255	20.0096	14.7716	15.5286	12.163	11.0506	12.5719	11.0152
orf19.2150	orf19.2150	Putative ortholog of mammalian electron transfer flavoprotein complex subunit ETF-alpha; Spider biofilm repressed	391.812	383.662	387.845	402.659	219.37	188.285	165.741	184.313
orf19.2151	NAG6	Protein required for wild-type mouse virulence and wild-type cycloheximide resistance; putative GTP-binding motif; similar to S. cerevisiae Yor165Wp; in gene cluster that encodes enzymes of GlcNAc catabolism; no human or murine homolog	240.631	226.893	174.348	186.174	158.004	115.234	114.623	117.104
orf19.2154	HXK1	N-acetylglucosamine (GlcNAc) kinase; involved in GlcNAc utilization; required for wild-type hyphal growth and mouse virulence; GlcNAc-induced transcript; induced by alpha pheromone in SpiderM medium	101.717	92.5925	80.2016	80.6315	88.4182	70.8452	60.8067	63.2074
orf19.2156	NAG1	Glucosamine-6-phosphate deaminase; required for normal hyphal growth and mouse virulence; converts glucosamine 6-P to fructose 6-P; reversible reaction in vitro; gene and protein is GlcNAc-induced; Spider biofilm induced	85.3882	78.6015	89.2631	84.4248	94.309	87.7341	78.0008	81.365
orf19.2157	DAC1	N-acetylglucosamine-6-phosphate (GlcNAcP) deacetylase; N-acetylglucosamine utilization; required for wild-type hyphal growth and virulence in mouse systemic infection; gene and protein are GlcNAc-induced; Spider biofilm induced	56.8787	53.6427	40.5914	43.5408	55.9903	41.1924	36.4542	38.523
orf19.2158	NAG3	Putative MFS transporter; similar to Nag4; required for wild-type mouse virulence and cycloheximide resistance; in gene cluster that includes genes encoding enzymes of GlcNAc catabolism; Spider biofilm repressed	24.5691	22.76	25.7899	28.6373	16.0256	13.7672	11.6612	9.62938
orf19.216	orf19.216	Protein with a metallo-dependent phosphatase domain; ketoconazole-induced; upregulation correlates with clinical development of fluconazole resistance	18.6576	19.4565	15.6119	16.7229	16.848	16.0743	18.3003	18.1175
orf19.216.1	orf19.216.1	Protein of unknown function	9.16587	13.5699	6.17126	6.72462	4.60164	7.51861	3.96611	9.04209
orf19.2160	NAG4	Putative transporter; fungal-specific; similar to Nag3p and to S. cerevisiae Ypr156Cp and Ygr138Cp; required for wild-type mouse virulence and wild-type cycloheximide resistance; gene cluster encodes enzymes of GlcNAc catabolism	0.278833	0.335893	0.0781606	0.116013	0.161589	0.201189	0.0336221	0.0728552
orf19.2163	orf19.2163	Protein of unknown function	213.392	196.588	143.771	159.804	124.458	98.1031	90.3205	91.608
orf19.2164.1	MFA1	a-factor mating pheromone; produced in opaque MTLa cells; required for mating competence of MTLa cells, but not MTLalpha; induced by alpha-factor	40.0904	41.3952	44.9516	0	27.8798	0	0	0
orf19.2165	orf19.2165	Predicted hydrolase; induced by nitric oxide	22.952	25.1864	17.5346	18.9118	29.3892	33.4131	32.0303	35.3134
orf19.2166	VMA5	Putative vacuolar H(+)-ATPase; plasma membrane localized; rat catheter biofilm repressed	34.8148	34.3115	37.184	32.4304	60.2061	64.6061	70.9478	74.8138
orf19.2167	orf19.2167	Protein of unknown function	66.782	60.5439	71.0032	68.8789	72.5302	80.583	69.8182	61.887
orf19.2168	orf19.2168	Putative sterol deacetylase; flow model biofilm induced; rat catheter biofilm repressed	0.000248489	0.0101008	0.578402	0.709722	1.06076	1.39846	1.48315	2.40627
orf19.2168.3	orf19.2168.3	Protein of unknown function	527.62	639.765	580.509	525.285	739.019	905.385	961.032	909.877
orf19.2169	orf19.2169	Protein of unknown function	0	0	0	0.363597	0.405147	0.360311	0.842997	0
orf19.217	orf19.217	Protein of unknown function	0.459356	0.237154	0.386292	0.509663	0.159723	0.378794	0.0553899	0.0600118
orf19.2170	PHM7	Putative transporter; fungal-specific; Hog1-repressed; repressed by 17-beta-estradiol, ethynyl estradiol; Hap43-induced; Spider biofilm induced	40.5068	37.1336	36.5231	35.6174	24.8073	27.4876	26.2804	26.4615
orf19.2172	ARA1	D-Arabinose dehydrogenase; dehydro-D-arabinono-1,4-lactone synthesis; active on D-arabinose, L-fucose, L-xylose, L-galactose; inhibited by metal ions, thiol group-specific reagents; induced on polystyrene adherence; Spider biofilm induced	177.962	182.133	95.4335	89.1439	276.858	240.599	281.385	259.378
orf19.2173	MAF1	Putative negative regulator of RNA polymerase III; decreased expression in hyphae vs yeast cells; caspofungin repressed; Spider biofilm repressed	47.8429	52.8589	39.1106	42.1342	68.3304	55.2488	65.6823	65.4798
orf19.2174	RAD57	Putative DNA recombination and repair protein; induced by interaction with macrophage; transcript is regulated by Nrg1, Mig1, and Tup1; essential protein; S. cerevisiae ortholog is essential	14.193	15.5792	14.5371	13.3959	12.0422	12.2712	12.0125	13.5068
orf19.2175	orf19.2175	Putative mitochondrial cell death effector; induced by nitric oxide; Spider biofilm induced; rat catheter biofilm repressed	288.743	280.043	202.647	205.787	289.242	255.714	279.739	269.61
orf19.2176	IFM3	Protein with a 2-hydroxyacid dehydrogenase catalytic domain; Hap43-repressed; Plc1-regulated; overlaps orf19.2177	19.3556	17.8488	13.8079	13.9532	15.8778	14.2807	12.8437	13.4504
orf19.2177	orf19.2177	Sef1p-, Sfu1p-, and Hap43p-regulated gene; overlaps IFM3/orf19.2176	104.151	100.875	56.0979	65.3592	45.4927	40.059	33.6283	37.9525
orf19.2178	MRS4	Mitochondrial carrier family member, involved in iron homeostasis; putative membrane transporter localized to the mitochondrial membrane; transcription under control of Atf2p; regulated by Sef1p, Sfu1p, and Hap43p	66.4912	70.7279	58.1096	60.2155	55.9061	50.9607	51.7	50.0743
orf19.2178.1	orf19.2178.1	Protein of unknown function; Spider biofilm induced	72.1542	76.6488	49.5241	48.4291	38.6829	38.5646	30.0041	36.3869
orf19.2179	SIT1	Transporter of ferrichrome siderophores, not ferrioxamine B; required for human epithelial cell invasion in vitro, not for mouse systemic infection; regulated by iron, Sfu1, Rfg1, Tup1, Hap43; rat catheter and Spider biofilm induced	35.6997	34.3056	10.5184	12.1069	6.2821	5.56004	4.90173	3.3022
orf19.2179.2	RPS10	Ribosomal protein S10; downregulated in the presence of human whole blood or PMNs; Spider biofilm repressed	9154.16	11079.8	12229.8	11369.5	7490.63	8809.97	7636.43	7984.02
orf19.218	BUD20	Protein similar to S. cerevisiae Bud20p, which affects bud site selection; transposon mutation affects filamentous growth	3.60715	1.59624	1.73337	1.71523	0.358357	0.637398	0.745639	0.403929
orf19.2180	orf19.2180	Protein of unknown function	17.9252	17.5212	20.0713	19.3795	13.7861	17.2746	16.9201	15.607
orf19.2181	orf19.2181	Protein of unknown function	121.621	115.85	139.869	159.923	64.3097	81.7235	61.1976	63.0405
orf19.2182	BLM3	Putative proteasome activator; binds core proteasome and stimulates proteasome-mediated protein degradation by inducing gate opening; ortholog of S. cerevisiae Blm10; transcript regulated by Nrg1 and Mig1	50.7081	46.6863	48.0214	46.5705	34.9268	33.1158	36.2584	36.6129
orf19.2183	KRE30	YEF3-subfamily ABC family protein; predicted not to be a transporter; repressed in core stress response; mutation confers hypersensitivity to amphotericin B	199.644	191.883	206.072	210.796	147.632	134.298	125.881	120.839
orf19.2184	orf19.2184	Putative fumarylacetoacetate hydrolase; clade-associated gene expression; rat catheter and Spider biofilm repressed	44.9955	46.0503	46.3139	44.7064	44.922	45.9385	45.2997	40.8686
orf19.2185	NSA1	Putative 66S pre-ribosomal particles conmponent; Hap43-induced; repressed by prostaglandins	50.8186	47.9525	49.9781	51.8702	29.6489	35.6377	23.9603	24.1694
orf19.2186	SEH1	Protein of unknown function	67.2543	57.7683	58.5327	60.2416	46.5659	46.4985	44.78	46.675
orf19.2187	ALG7	Protein involved in cell wall mannan biosynthesis; mutation confers hypersensitivity to tunicamycin; transcript elevated in chk1, nik1, and sln1 homozygous null mutants; possibly essential gene, disruptants not obtained by UAU1 method	24.4703	26.3064	26.0264	24.8796	17.2912	18.437	19.6993	21.2401
orf19.2190	VRP1	Verprolin-related protein involved in actin cytoskeleton organization and polarized morphogenesis; interacts with Wal1p and Myo5p; downregulated upon adherence to polystyrene	75.8625	62.1551	63.1983	65.4075	37.9153	47.6193	38.8497	36.878
orf19.2191	orf19.2191	Protein of unknown function	38.3171	36.7878	39.1192	41.7862	39.7829	35.7545	37.0599	35.8315
orf19.2191.1	orf19.2191.1	Protein of unknown function	222.635	248.21	240.842	226.293	217.617	288.494	242.568	297.167
orf19.2192	GDH2	Putative NAD-specific glutamate dehydrogenase; fungal-specific; transcript regulated by Nrg1, Mig1, Tup1, and Gcn4; stationary phase enriched protein; flow model biofilm induced; Spider biofilm induced	109.151	103.994	53.9574	53.9783	78.6062	76.559	86.9772	75.8784
orf19.2193	PRS5	Putative 5-phospho-ribosyl-1(alpha)-pyrophosphate synthetase; Hap43-induced; repressed during core stress response	90.714	87.1383	76.3051	75.803	62.443	57.6876	48.8092	48.5998
orf19.2194	APM4	Cargo-binding subunit of the clathrin associated protein complex (AP-2), involved in endocytosis	23.6886	25.2773	21.9976	21.3866	26.188	25.0585	25.5425	25.2229
orf19.2195	orf19.2195	Protein of unknown function	0	0	0	0	0	0	0	0
orf19.2196	orf19.2196	Protein of unknown function	18.2305	18.963	23.5855	24.3943	27.754	27.8334	29.9647	30.9247
orf19.2197	orf19.2197	Protein of unknown function	0.165496	0.284805	0.231954	0.0459052	0.153453	0.238825	0.439027	0.172968
orf19.2198	FLC3	Protein involved in heme uptake; putative FAD transporter, similar to S. cerevisiae Flc3p	16.5024	14.2528	16.549	16.984	13.0597	12.7272	12.8952	11.9219
orf19.2199	PHO86	Putative endoplasmic reticulum protein; possibly adherence-induced	36.8654	36.6396	31.8144	32.8026	32.5024	36.719	32.1159	32.2524
orf19.22	orf19.22	Protein with homology to peroxisomal membrane proteins; Sef1p-, Sfu1p-, and Hap43p-regulated gene	16.8817	14.9799	17.5978	18.2184	19.9946	21.0446	20.7379	20.5386
orf19.22.1	orf19.22.1	0	0.099804	0	0.0839293	0	0.138812	0.185176	0.0722071	0.0782324
orf19.220	PIR1	1,3-beta-glucan-linked cell wall protein; N-mannosylated, O-glycosylated by Pmt1; cell wall defect in het mutant; Hog1/fluconazole/hypoxia induced; iron/Efg1/Plc1/temp regulated; flow model biofilm induced; hyphal, Spider biofilm repressed	86.6049	73.7055	51.7519	46.1512	96.9023	126.42	137.281	139.624
orf19.2200	orf19.2200	Protein of unknown function; rat catheter biofilm repressed	61.9775	58.4467	64.4671	65.74	81.5397	80.7416	78.1719	80.0243
orf19.2201	orf19.2201	Protein of unknown function	155.881	150.008	148.422	134.288	258.584	245.023	236.067	246.07
orf19.2202	orf19.2202	Protein of unknown function; induced by alpha pheromone in SpiderM medium	8.11881	8.59296	5.96596	6.50088	8.7398	8.40252	7.11853	7.9441
orf19.2203	orf19.2203	Protein of unknown function	0	0	0	0.512728	0	1.52429	0	0.482981
orf19.2203.1	orf19.2203.1	Protein of unknown function	0.919701	0.830931	0.934543	0.988535	1.28033	1.39831	1.55259	1.59203
orf19.2204	orf19.2204	Predicted membrane protein of unknown function; Spider biofilm induced	42.8639	42.7375	30.1522	28.7378	27.8627	29.2106	26.8206	28.3835
orf19.2204.2	RHO2	Protein of unknown function	38.4209	39.2101	39.0722	41.7859	41.383	42.2189	39.7563	41.1827
orf19.2208	orf19.2208	Protein of unknown function	69.696	63.109	64.439	65.5319	59.8522	59.7378	54.2835	52.4661
orf19.2209	YVC1	Putative vacuolar cation channel shock; repressed by alpha pheromone in SpiderM medium; flow model biofilm repressed	75.9321	70.0165	71.9248	72.6738	56.7799	48.5428	47.797	52.1155
orf19.2210	orf19.2210	Protein of unknown function; Spider biofilm induced	9.11724	7.88065	9.43862	8.76504	10.7834	12.4094	10.2691	11.0989
orf19.2211	orf19.2211	Protein of unknown function	0.224285	0.347378	0.188611	0.186636	0.545906	0.277425	0.081134	0.175808
orf19.2212	orf19.2212	Protein of unknown function	0	0	0	0	5.81466e-08	0	0	2.37516e-08
orf19.2213	orf19.2213	Protein of unknown function	6.79679	6.62812	7.16227	8.41397	6.76902	7.0319	7.16363	7.66273
orf19.2214	orf19.2214	Protein of unknown function	86.1704	91.8423	105.985	102.192	78.0518	82.5437	78.0912	80.3947
orf19.2215	GLE1	Putative nucleoporin; moderately induced at 42 degrees C	47.0769	43.0551	44.7478	45.1301	50.7614	50.3401	45.5415	42.7209
orf19.2216	PDS5	Putative protein with a predicted role in establishment and maintenance of sister chromatid condensation and cohesion; cell-cycle regulated periodic mRNA expression	13.9462	12.3131	14.5402	15.0607	11.4491	11.5003	11.3528	12.4154
orf19.2219	ORF298	Predicted ORF in retrotransposon Tca3; similar to Gag-Pol; a-specific transcript, alpha-factor induced; rat catheter biofilm repressed; mRNA binds She3	41.2628	38.3257	35.5798	39.7019	91.7631	89.027	82.2742	78.9488
orf19.2220	orf19.2220	Protein of unknown function; Hap43-repressed gene; by Rgt1; repressed in Spider biofilms by Bcr1, Tec1, Brg1, Rob1 and induced by Efg1, Ndt80; Spider biofilm induced	6.43104	6.62041	0.790932	2.57783	7.72304	7.34696	9.26088	9.70796
orf19.2222	orf19.2222	Putative casein kinase; plasma membrane-localized	24.6821	26.0201	28.4902	27.9267	19.9336	20.9991	20.6952	21.4388
orf19.2227	orf19.2227	Protein of unknown function; flow model biofilm induced; nitric oxide-repressed	5.42552	6.04584	7.13745	7.01802	10.0863	10.0665	10.1048	10.8216
orf19.2228	orf19.2228	Protein of unknown function	19.3235	23.4279	25.4087	25.0478	35.8382	43.085	51.2646	54.8291
orf19.2229	orf19.2229	Protein of unknown function	18.1756	17.41	16.9617	15.4641	12.7343	15.0814	16.6915	14.638
orf19.223	orf19.223	Putative serine/threonine protein kinase; Hap43-repressed; induced by prostaglandins; possibly an essential gene, disruptants not obtained by UAU1 method; flow model biofilm induced; Spider biofilm induced	50.7808	51.5168	38.1997	39.3727	45.3526	49.8459	47.9083	45.3503
orf19.2230	orf19.2230	Putative pre-mRNA-splicing factor; decreased transcription is observed upon benomyl treatment	21.2008	25.5393	22.2264	15.3959	34.192	29.9804	37.7139	36.6714
orf19.2231	orf19.2231	Protein of unknown function; Spider biofilm induced	33.8148	34.1352	35.3733	35.4745	25.7927	31.0389	31.4806	24.7292
orf19.2232	RPL11	Ribosomal protein; repressed by phagocytosis; colony morphology-related gene regulation by Ssn6; Hap43-induced; Spider biofilm repressed	1170.73	1188.63	1148.38	1161.87	1394.11	1275.72	1359.97	1328.28
orf19.2233	PRE2	Putative proteasome beta-5 subunit; macrophage-induced protein	173.524	160.056	170.877	167.098	185.167	171.03	160.533	174.484
orf19.2236	FHL1	Fork-head transcription factor; forms a heterodimer with Ifh1 that is tethered to promoters by Tbf1; positively regulates rRNA and ribosomal protein gene transcription	27.7136	26.6769	33.7494	36.2442	18.7966	19.5953	18.1544	15.9899
orf19.2237	SPR1	Putative GPI-anchored protein; similar but not orthologous to S. cerevisiae Spr1, a sporulation-specific exo-1,3-beta-glucanase; mutant is viable	0.104308	0.161555	0.482445	0.216997	0.580308	0.612854	0.339597	0.572342
orf19.2237.1	orf19.2237.1	Ortholog of Slx9 required for pre-rRNA processing; associated with 90S pre-ribosome and 43S small ribosomal subunit precursor, interacts with U3 snoRNA in S. cerevisiae; gene has intron; Spider biofilm induced	22.399	23.9412	28.0337	26.8665	42.2277	44.5352	43.932	37.9274
orf19.2238	LTE1	Protein similar to GDP/GTP exchange factors; repressed by alpha pheromone in SpiderM medium; flow model biofilm repressed	9.43048	9.25638	14.8875	15.7067	8.93404	9.58681	11.225	10.037
orf19.2241	PST1	Putative 1,4-benzoquinone reductase; hyphal-induced; regulated by Cyr1, Ras1, Efg1, Nrg1, Rfg1, Tup1; Hap43-induced; Spider biofilm induced	232.134	232.589	158.324	152.992	433.604	376.173	375.745	428.319
orf19.2242	PRB1	Endoprotease B; regulated by heat, carbon source (GlcNAc-induced), nitrogen, macrophage response, human neutrophils; similar to (does not replace) S. cerevisiae vacuolar B protease Prb1p; flow model biofilm induced; Spider biofilm induced	59.7254	57.0891	40.3669	40.5156	62.5403	53.3004	52.8003	50.8315
orf19.2244	orf19.2244	Similar to oxidoreductases and to S. cerevisiae Yjr096wp; Sfu1 repressed; induced by benomyl treatment, Ssr1; Hap43-repressed; flow model biofilm repressed	87.232	87.5654	80.3299	73.3182	94.3232	94.3914	98.7153	104.152
orf19.2245	YPT72	Vacuolar Rab small monomeric GTPase involved in vacuolar biogenesis; involved in filamentous growth and virulence	43.412	41.2175	34.0065	32.4133	50.3507	51.9046	53.297	53.7821
orf19.2246	orf19.2246	Protein of unknown function	162.324	172.969	149.692	166.533	137.8	118.761	107.446	113.97
orf19.2247	orf19.2247	Protein of unknown function	0.147651	0.152457	0.620829	0.409553	0.410719	0.334828	0.498511	0.192896
orf19.2248	ARE2	Acyl CoA:sterol acyltransferase; uses cholesterol and oleoyl-CoA substrates; protoberberine derivative drug inhibits enzyme activity; ketoconazole-induced; Hap43-repressed; flow model biofilm induced; Spider biofilm induced	62.435	58.4211	65.0894	66.7242	104.445	99.0464	107.358	113.027
orf19.2249	orf19.2249	Putative metalloprotease of the mitochondrial inner membrane; expression downregulated in an ssr1 null mutant	52.9655	47.2147	49.7797	46.4163	59.7568	54.6957	54.6805	60.0311
orf19.225	orf19.225	Predicted 2-hydroxyacid dehydrogenase; Hap43-repressed gene	39.4648	34.3783	39.0442	36.3478	37.4005	37.0764	37.6431	34.8616
orf19.2250	SPE3	Putative spermidine synthase; predicted role in pantothenate and spermidine biosynthesis; Spider biofilm repressed	191.781	200.066	186.53	180.837	129.805	110.713	100.567	93.3833
orf19.2251	AAH1	Adenine deaminase; purine salvage and nitrogen catabolism; colony morphology-related regulation by Ssn6; Hog1, CO2-induced; chlamydospore formation repressed in C. albicans and C. dubliniensis; rat catheter and F-12/CO2 biofilm induced	52.2336	51.4491	51.4273	47.9097	34.5694	39.0922	28.7462	21.116
orf19.2252	orf19.2252	Protein of unknown function; rat catheter biofilm repressed	0.0536778	0	0.0902798	0.0893346	0.261301	0.331978	0.155341	0.294531
orf19.2253	orf19.2253	Protein of unknown function; expression regulated by white-opaque switch; repressed by alpha pheromone in SpiderM medium; Spider biofilm induced	2.09115	1.47786	1.22453	0.626698	0.841377	2.09206e-37	0.000866978	0.0847575
orf19.2256	orf19.2256	Protein of unknown function	86.7838	91.857	107.479	98.135	79.7447	86.8499	79.1721	78.0017
orf19.2257	orf19.2257	Predicted ER protein involved in ER-nucleus signaling; Spider biofilm repressed	154.8	140.35	160.153	156.045	159.18	157.529	153.1	159.945
orf19.2258	orf19.2258	Protein of unknown function	15.7978	12.8826	13.986	16.7675	23.1585	22.5793	20.6754	20.8068
orf19.2259	orf19.2259	Protein of unknown function	56.3888	57.7744	76.1681	71.0622	61.3722	60.2776	61.3438	64.5484
orf19.2260	orf19.2260	Putative transcription factor with zinc finger DNA-binding motif	36.6769	36.0657	34.6635	31.8912	30.0931	32.4987	31.723	26.1757
orf19.2261	orf19.2261	Protein of unknown function	34.4055	30.4475	49.4391	46.7225	40.9133	41.7829	46.235	49.5231
orf19.2262	orf19.2262	Protein similar to quinone oxidoreductases; induced by benomyl treatment, nitric oxide; oxidative stress-induced via Cap1; stationary-phase enriched protein; Spider biofilm induced	59.9618	58.3137	47.1383	41.1418	82.0354	68.1236	73.707	71.6882
orf19.2263	orf19.2263	Protein of unknown function	78.6871	93.1323	91.3409	83.925	153.885	154.747	186.237	189.128
orf19.2264	OLE2	Protein with similarity to fatty acid desaturase (stearoyl-CoA desaturase); homozygous null mutant shows decreased production of prostaglandin E2	57.3043	54.4068	49.893	47.3615	34.1665	32.8924	29.8488	29.3063
orf19.2265	orf19.2265	Protein of unknown function	68.8836	69.7193	81.1419	79.3334	61.9645	61.8458	60.4481	61.4682
orf19.2266	orf19.2266	Protein of unknown function	21.9909	20.1751	17.1469	18.0049	11.7479	12.0927	10.4404	10.0183
orf19.2267	RFA2	Putative DNA replication factor A; RNA abundance regulated by cell cycle, tyrosol and cell density	92.5798	101.235	102.077	104.581	77.7362	67.299	65.738	65.9612
orf19.2268	RCK2	Predicted MAP kinase-activated protein kinase, similar to S. cerevisiae serine/threonine protein kinase Rck2p; induced by osmotic stress via Hog1p; macrophage/pseudohyphal-repressed; mutants are sensitive to rapamycin	125.483	117.87	88.676	93.1293	91.2525	90.5466	85.916	78.4632
orf19.2269	orf19.2269	Putative 3-phosphoserine phosphatase; induced by benomyl or in azole-resistant strain that overexpresses MDR1; early-stage flow model biofilm induced; Spider biofilm repressed	158.154	196.444	130.331	123.919	233.4	206.128	215.682	242.31
orf19.227	COX7	Putative cytochrome c oxidase; flucytosine induced; repressed by nitric oxide	167.422	181.695	146.085	142.087	251.849	295.522	288.405	352.71
orf19.2270	SMF12	Ortholog of S. cerevisiae Smf1; manganese transporter; Gcn4-regulated; Hap43, alkaline induced; caspofungin repressed; mutants are viable	92.1131	99.527	56.1027	58.5479	64.8593	60.4415	56.8227	52.9941
orf19.2272	AFT2	Putative Aft domain transcription factor; role in regulation of iron metabolism, oxidative stress, adhesion, hyphal growth, colony morphology, virulence; complements S. cerevisiae aft1 mutation; Spider biofilm induced	12.4449	12.534	15.6338	15.4489	11.4388	11.6555	11.8082	11.854
orf19.2274	orf19.2274	Protein of unknown function	3.54861	3.90051	8.18242	6.57265	3.9803	4.67256	4.88631	5.11458
orf19.2275	orf19.2275	Putative mitochondrial ribosomal protein; predicted role in aerobic respiration; Spider biofilm repressed	159.555	151.446	177.172	187.823	157.432	152.625	159.708	152.523
orf19.2276	orf19.2276	Protein of unknown function	173.512	163.642	154.689	147.743	193.333	152.748	174.358	170.911
orf19.2277	TPK2	cAMP-dependent protein kinase catalytic subunit; isoform of Tpk1; needed for epithelial cell damage, engulfment and oral (not systemic) virulence in mice; control of morphogenesis and stress response; rat catheter, Spider biofilm repressed	81.87	77.8868	72.4361	75.2917	79.904	87.154	90.0195	89.6175
orf19.2278	orf19.2278	Putative 20S proteasome assembly protein; filament induced; induced by alpha pheromone in SpiderM medium	243.417	258.659	260.527	244.061	288.963	305.313	329.768	323
orf19.2280	ZCF10	Putative transcription factor with zinc cluster DNA-binding motif	8.61175	8.46092	7.24198	6.75356	5.86177	7.27895	7.15565	6.64813
orf19.2281	orf19.2281	Protein of unknown function	9.04712	7.00619	8.53592	7.66616	8.47828	6.72121	7.18408	7.82679
orf19.2282	orf19.2282	Protein of unknown function	4.81362	6.00186	6.03377	4.68579	6.88449	5.11154	6.83379	5.48183
orf19.2283	DQD1	Putative 3-dehydroquinate dehydratase; ketoconazole-repressed; protein abundance downregulated by macrophages; flow model biofilm induced	261.092	282.563	323.017	336.639	360.45	343.873	385.087	352.066
orf19.2284	orf19.2284	Protein with an FMN-binding domain; Hap43-repressed; flow model biofilm induced	29.6773	28.401	35.5815	35.7018	29.0583	31.418	28.9456	31.5157
orf19.2285	orf19.2285	Protein of unknown function; transcription induced by benomyl treatment	1.8744	1.38953	3.5567	3.35949	3.30889	2.85354	3.26858	4.18177
orf19.2286	orf19.2286	Putative deoxyhypusine hydroxylase; ketoconazole-induced; protein level decreases in stationary phase cultures; required for biofilm formation; Spider biofilm repressed	325.909	329.243	357.345	341.41	231.317	202.014	197.011	195.613
orf19.2287	RPA12	Putative DNA-directed RNA polymerase I; induced upon adherence to polystyrene	182.284	217	171.332	170.996	121.995	122.033	114.67	110.968
orf19.2288	CCT5	T-complex protein 1, epsilon subunit; protein present in exponential and stationary growth phase yeast cultures; Spider biofilm repressed	252.6	247.169	238.102	256.102	180.364	158.854	149.038	149.845
orf19.2289	ARP3	Protein with Myo5p-dependent localization to cortical actin patches at hyphal tip; mutation confers hypersensitivity to cytochalasin D; Spider biofilm repressed	145.468	140.831	129.531	133.686	105.317	92.9953	91.4606	102.128
orf19.229	orf19.229	Protein of unknown function	24.7559	24.1877	21.7582	20.3342	32.8028	28.6108	31.8141	36.0978
orf19.2290	TOR1	Protein similar to TOR family phosphatidylinositol kinases; mutation confers resistance to rapamycin; involved in regulation of ribosome biogenesis, starvation response, and adhesion	37.9538	37.6407	37.0913	38.4741	27.605	23.5987	26.2763	24.4723
orf19.2296	orf19.2296	Predicted mucin-like protein; ketoconazole-induced; fluconazole-repressed; induced in cyr1 mutant; colony morphology-related gene regulation by Ssn6; flow model biofilm induced; Spider biofilm induced	393.18	360.269	187.848	220.29	267.58	185.002	222.373	198.561
orf19.2297	ARL3	Putative Ras superfamily GTPase; induced by nitric oxide independent of Yhb1p	37.1898	41.1514	44.7645	42.5406	31.3826	27.7723	26.2639	29.8043
orf19.2298	WBP1	Putative oligosaccharyltransferase subunit; Spider biofilm repressed	167.749	188.521	164.31	170.263	121.825	92.5171	86.4964	102.384
orf19.2299	orf19.2299	Protein of unknown function	96.6555	97.5645	104.265	91.5245	124.003	136.871	116.83	123.052
orf19.23	RTA3	Similar to S. cerevisiae Rta1 (role in 7-aminocholesterol resistance) and Rsb1 (flippase); putative drug-responsive regulatory site; induced by fluphenazine, estradiol, ketoconazole, caspofungin; rat catheter biofilm induced	140.09	149.435	93.7975	93.5944	112.232	107.425	99.6268	97.5202
orf19.230	orf19.230	Ortholog of S. cerevisiae Pet111; a mitochondrial translational activator specific for the COX2 mRNA; Hap43-induced gene	6.03814	7.52866	7.88005	6.87322	10.973	11.8373	14.1771	13.1052
orf19.2301	orf19.2301	Protein of unknown function	85.2384	93.2724	89.2053	81.4742	95.3562	86.7516	104.04	100.853
orf19.2302	orf19.2302	Protein of unknown function	24.5005	24.2924	14.1329	14.733	13.3647	12.2729	15.5664	13.4567
orf19.2303	FGR16	Protein lacking an ortholog in S. cerevisiae; transposon mutation affects filamentous growth; fluconazole-downregulated	20.2141	19.8631	20.6889	18.7645	16.9989	18.7595	17.5102	20.7463
orf19.2304	orf19.2304	Protein similar to S. cerevisiae Gvp36p; transposon mutation affects filamentous growth	133.845	148.993	147.144	144.978	178.105	160.348	157.439	166.156
orf19.2305	orf19.2305	Protein of unknown function	38.3026	34.311	39.5696	38.8387	86.701	84.8094	74.8762	79.8318
orf19.2306	orf19.2306	Protein of unknown function	56.16	57.023	56.3982	51.1411	88.56	93.179	93.885	94.0828
orf19.2307	orf19.2307	Protein of unknown function	38.2187	38.1854	36.2289	34.8912	25.3619	23.7688	22.5897	21.1311
orf19.2308	orf19.2308	Putative 6-phosphofructo-2-kinase; catalyzes synthesis of fructose-2,6-bisphosphate; Hap43-repressed; flow model, rat catheter and Spider biofilm induced	136.479	158.819	139.568	138.715	182.108	204.59	171.68	141.339
orf19.2309	PET127	Protein with a predicted role in 5'-end processing of mitochondrial RNAs; ortholog of S. cerevisiae Pet127; Hap43-induced; rat catheter and Spider biofilm induced	29.308	27.9211	28.4317	27.5325	18.2108	19.3452	17.3769	15.1954
orf19.2309.2	RPL2	Putative 60S ribosomal protein L2; Hap43-induced gene; repressed in infected rabbit kidney in SC5314, but not NGY152, strain background; Spider biofilm repressed	5223.14	5323.62	5915.89	6273.29	3397.25	2932.54	2934.38	2941.95
orf19.231	APL2	Phosphorylated protein of unknown function; mutation confers hypersensitivity to toxic ergosterol analog	20.2466	20.8123	25.982	24.9589	25.3146	24.4854	27.9904	27.6377
orf19.2310	orf19.2310	Predicted single-stranded nucleic acid binding protein; flow model biofilm induced	4.26756	3.76385	4.78502	5.99264	6.92477	6.48835	4.43833	7.17817
orf19.2310.1	RPL29	Ribosomal protein L29; induced upon germ tube formation; colony morphology-related gene regulation by Ssn6; intron in 5'-UTR; Spider biofilm repressed	1342.34	1291.8	1468.22	1876.44	492.212	756.327	562.454	593.843
orf19.2311	RPL82	Predicted ribosomal protein; genes encoding cytoplasmic ribosomal subunits, translation factors, and tRNA synthetases are downregulated upon phagocytosis by murine macrophage	455.761	444.067	563.083	565.049	373.029	321.203	301.565	300.811
orf19.2312	orf19.2312	Protein similar to ferric reductase Fre10p; possibly an essential gene, disruptants not obtained by UAU1 method	9.36123	9.00866	13.054	13.4643	7.90351	8.26253	8.26029	8.22376
orf19.2313	orf19.2313	Putative ortholog of S. cerevisiae Pex32 a peroxisomal integral membrane protein with a role in negative regulation of peroxisome size; Hap43-repressed gene	0.988507	1.01899	1.20261	0.812182	1.05121	0.917376	0.680812	0.792389
orf19.2314	orf19.2314	Protein with a role in nucleolar integrity and processing of pre-rRNA; mutation confers hypersensitivity to 5-fluorocytosine (5-FC), 5-fluorouracil (5-FU), and tubercidin (7-deazaadenosine); Hap43-induced; Spider biofilm induced	258.268	248.766	185.305	178.33	386.418	340.329	309.899	297.819
orf19.2315	RTG3	Putative transcription factor with bZIP DNA-binding motif; mutants are sensitive to cations and antifungal drugs, and defective in filamentous growth	36.7211	34.1503	37.5722	39.0412	37.0657	37.2958	38.1418	37.9782
orf19.2317	orf19.2317	Protein of unknown function; induced by alpha pheromone in SpiderM medium	0.29449	0.304075	1.40334	0.653483	0.887446	0.607105	1.0653	1.61587
orf19.2318.1	orf19.2318.1	Protein of unknown function	54.6716	58.5134	65.1451	65.2185	41.1785	42.74	43.7535	47.6938
orf19.2319	orf19.2319	Putative nucleolar protein with a predicted role in pre-rRNA processing; Hap43-induced gene; repressed in core stress response	128.258	122.632	126.268	128.66	106.322	97.678	84.6005	78.1504
orf19.232	orf19.232	RNA polymerase II mediator complex subunit; possibly an essential gene, disruptants not obtained by UAU1 method	6.15224	6.71342	9.9946	9.48273	9.77228	13.1011	14.1625	12.3302
orf19.2320	orf19.2320	Putative serine/threonine-protein kinase; possibly an essential gene, disruptants not obtained by UAU1 method	94.006	88.7008	93.9132	94.9207	94.6768	85.5445	73.4014	64.7376
orf19.2322.3	ERP5	Protein involved in ER to Golgi transport; rat catheter and Spider biofilm repressed	217.352	232.784	280.069	269.414	212.618	209.979	217.529	226.375
orf19.2324	UBA4	Putative ubiquitin activating protein; Hap43-repressed; induced by prostaglandins; clade-associated gene expression	65.8669	68.6156	55.3902	56.1046	58.0745	55.0338	47.654	47.468
orf19.2325	orf19.2325	Protein of unknown function	19.3486	18.743	19.324	20.2546	15.5785	15.7171	14.9536	15.5547
orf19.2326	orf19.2326	Protein of unknown function	30.8514	30.9493	30.889	30.2651	28.3061	24.7269	22.6174	23.4128
orf19.2328	orf19.2328	Protein of unknown function	81.7982	90.5124	115.006	122.099	87.7504	88.1688	85.9558	87.4474
orf19.2329.1	RPS17B	Ribosomal protein 17B; downregulated upon phagocytosis by murine macrophages; Hap43-induced; Spider biofilm repressed	1120.57	1199.53	1518.51	1486.97	1382.04	1375.66	1560.8	1525.56
orf19.233.1	HRT1	Ortholog of S. cerevisiae Hrt1; component of a nuclear ubiquitin-protein ligase complex involved in cell cycle control; induced by hydroxyurea; Spider biofilm induced	65.697	75.1753	73.2775	80.4292	49.355	61.0532	57.2364	70.82
orf19.2330	orf19.2330	Putative U3 snoRNA-associated protein; Hap43-induced; transposon mutation affects filamentous growth; repressed by prostaglandins	84.6653	81.7125	89.3488	85.555	62.0647	60.4323	55.9393	56.2339
orf19.2331	ADA2	Zinc finger and homeodomain transcriptional coactivator; role in cell wall integrity and in sensitivity to caspofungin; required for the normal transcriptional response to caspofungin; required for yeast cell adherence to silicone substrate	12.3308	12.3464	15.1877	15.5469	12.011	12.0427	14.4181	16.8905
orf19.2332	orf19.2332	Protein of unknown function	0.485002	0.500787	0.101965	0.403588	0.168641	0.224967	0.0877234	0.475217
orf19.2333	orf19.2333	Protein of unknown function	134.551	121.169	97.0964	103.97	90.7107	78.7521	73.4272	74.6869
orf19.2334	BIG1	Endoplasmic reticulum (ER) protein; ortholog of S. cerevisiae Big1; required for beta-1,6-glucan synthesis, filamentation, adhesion, and virulence; rat catheter biofilm repressed	24.6914	27.4253	33.9298	31.0468	37.5919	33.7209	39.2782	38.7702
orf19.2335	orf19.2335	Putative aspartyl aminopeptidase; stationary phase enriched protein; mutation confers hypersensitivity to 5-fluorouracil (5-FU); Hog1-induced; planktonic growth-induced; rat catheter and Spider biofilm repressed	111.904	120.944	140.514	132.477	125.597	122.16	136.589	132.213
orf19.2336	orf19.2336	Pry family pathogenesis-related protein; predicted to be extracellular	9.20057	8.22118	15.0279	17.2263	19.564	22.542	24.7059	22.7454
orf19.2337	ALP1	Cystine transporter; present in pathogenic yeasts (no human or murine homolog); Spider biofilm induced	77.6452	81.7969	76.5375	80.3175	79.0949	73.9055	76.1521	83.2616
orf19.234	PHA2	Putative prephenate dehydratase; Hap43p-repressed gene; expression downregulated in an ssr1 null mutant	12.2576	13.6301	17.8101	15.8733	14.5264	15.8346	16.9493	17.056
orf19.2340	CDC48	Putative microsomal ATPase; plasma membrane-localized; regulated by Gcn2 and Gcn4; induced by amino acid starvation (3-AT); macrophage/pseudohyphal-repressed; protein levels decrease in stationary phase yeast; Spider biofilm repressed	620.485	618.679	465.905	491.043	481.925	401.31	387.088	407.121
orf19.2341	HNT1	Protein with similarity to protein kinase C inhibitor-I; protein level decreases in stationary phase cultures	287.97	351.144	304.763	303.975	395.113	485.853	509.122	577.38
orf19.2342	SFT2	Putative membrane protein; transcript regulated by Mig1; Spider biofilm induced	51.3098	45.2455	52.3872	51.4231	76.5731	74.8164	74.0635	64.1949
orf19.2343	VPS23	ESCRT I protein sorting complex protein; involved in proteolytic activation of Rim101, which regulates pH response; ortholog of S. cerevisiae Stp22/Vps23	18.9999	18.9079	20.2059	20.0384	17.0775	17.1843	18.0731	16.3453
orf19.2343.1	orf19.2343.1	Putative vacuolar H+ ATPase subunit e of the V-ATPase V0 subcomplex; added to Assembly 21 based on comparative genome analysis	251.063	314.87	281.66	280.099	115.479	147.178	116.308	133.664
orf19.2344	ASR1	Heat shock protein; transcript regulated by cAMP, osmotic stress, ciclopirox olamine, ketoconazole; repressed by Cyr1, Ras1; colony morphology-related regulated by Ssn6; stationary phase enriched; Hap43-induced; Spider biofilm induced	1267.2	1179	630.942	706.713	852.18	748.71	647.56	675.761
orf19.2346	orf19.2346	Putative protein of unknown function, transcription is positively regulated by Tbf1p	26.3295	26.7964	18.2342	17.9805	26.4275	23.1291	26.0456	21.5862
orf19.2347	MNN2	Alpha-1,2-mannosyltransferase; similar to S. cerevisiae Mnn2; role in cell wall integrity, temperature sensitivity; iron utilization in low iron; Tn mutation affects filamentous growth; filament induced; increased chitin exposes beta-glucan	48.7199	47.258	51.496	46.1068	50.6655	45.7518	42.0601	42.6704
orf19.2350	orf19.2350	Protein similar to S. cerevisiae Yor378w; MFS family transporter; transposon mutation affects filamentous growth; null mutants are viable; fungal-specific (no human or murine homolog)	14.8245	17.2394	13.4191	14.1393	9.52154	9.50347	10.1552	10.8096
orf19.2351	NIT3	Putative nitrilase; regulated by Gcn2p and Gcn4p; protein present in exponential and stationary growth phase yeast cultures	88.1229	93.8654	113.099	113.834	113.439	99.2132	103.575	118.015
orf19.2352	orf19.2352	Protein of unknown function	35.3441	38.8091	52.0298	47.9408	48.3787	37.2944	43.5195	41.5279
orf19.2356	CRZ2	C2H2 transcription factor; crz1 not crz2 null mutation suppresses fluconazole resistance of homozygous cka2 null; Rim101-repressed at pH 8; required for yeast cell adherence to silicone substrate; Spider biofilm induced	16.0941	16.618	11.6902	12.9689	9.23155	11.431	9.91576	10.4362
orf19.236	RPL9B	Ribosomal protein L9; repressed upon phagocytosis by murine macrophages; repressed by nitric oxide; protein levels decrease in stationary phase; Hap43-induced; Spider biofilm repressed	1733.42	1946.84	1717.23	1578.08	1484.39	1604.48	1470.68	1625.5
orf19.2360	URA2	Putative bifunctional carbamoylphosphate synthetase-aspartate transcarbamylase; flucytosine induced; macrophage/pseudohyphal-induced; 5'-UTR intron; flow model biofilm repressed	6.52939	5.70435	8.80784	6.30188	7.85894	8.83713	10.2242	7.42647
orf19.2361	SPT10	Protein of unknown function	21.3654	21.6043	23.8721	21.5799	24.3191	26.0963	26.2899	26.8728
orf19.2362	orf19.2362	Putative 90S preribosome component; Hap43p-induced gene; possibly an essential gene, disruptants not obtained by UAU1 method	53.4796	59.5221	61.5992	59.0002	50.94	59.5447	54.0919	52.074
orf19.2363	orf19.2363	Protein of unknown function	107.209	100.101	121.935	118.096	97.7853	114.254	113.883	105.979
orf19.2364	MIS11	Predicted mitochondrial C1-tetrahydrofolate synthase precursor; putative protein of glycine catabolism; repressed by Efg1; fluconazole-induced; stationary phase enriched protein; rat catheter and Spider biofilm repressed	227.772	216.15	220.751	229.411	156.106	147.236	150.326	148.361
orf19.2365	POL2	DNA polymerase epsilon; transcript induced by interaction with macrophage; transcript is regulated by Tup1; periodic mRNA expression, peak at cell-cycle G1/S phase	15.5026	15.4962	18.1393	19.2743	14.2074	12.8281	13.9557	12.953
orf19.2366	orf19.2366	Protein of unknown function	0.269398	0.154537	0.245482	0.0754535	0.262486	0.35174	0.250639	0.199592
orf19.2367	orf19.2367	Putative protein of unknown function; Hap43-induced; repressed by Rim101; Spider biofilm induced	9.10076	8.33405	11.3913	12.2495	18.693	22.5711	23.4081	24.2069
orf19.2368	orf19.2368	Predicted component of U5 snRNP; Spider biofilm induced	30.7178	26.3238	35.6315	32.8806	51.5417	50.2712	48.4535	47.9819
orf19.2369	orf19.2369	Protein of unknown function	24.6346	23.0713	29.7575	30.1461	39.3991	40.6315	40.4142	44.2629
orf19.2369.1	ATX1	Putative cytosolic copper metallochaperone; flucytosine induced; Ssr1-repressed; rat catheter biofilm induced	104.599	134.728	118.541	106.62	203.188	249.492	231.77	301.623
orf19.2370	DSL1	Protein similar to S. cerevisiae Dsl1p, which is a member of the t-SNARE complex of the endoplasmic reticulum	4.07545	5.14323	5.14083	5.24401	9.23727	10.1754	11.958	13.7249
orf19.2371	orf19.2371	Putative Gag protein of retrotransposon Tca2; separated by a stop codon from Pol protein orf19.2372; likely translated as single polyprotein that includes Gag, reverse transcriptase, protease, and integrase; rat catheter biofilm repressed	500.999	487.896	657.854	672.165	561.64	534.708	547.005	544.222
orf19.2372	orf19.2372	Pol protein of retrotransposon Tca2; separated by a stop codon from Gag protein orf19.2371; likely translated as single polyprotein with Gag, reverse transcriptase, protease, and integrase; rat catheter biofilm repressed	143.287	138.548	227.446	238.671	129.205	112.268	123.739	122.077
orf19.2376	orf19.2376	Protein of unknown function	3.71308	1.53185	1.95484	1.3439	1.0266	0.781893	0.73664	0.737977
orf19.2378	orf19.2378	Protein of unknown function	73.6291	81.3142	108.777	88.9503	110.021	140.675	126.204	147.705
orf19.2379	NOT4	Putative E3 ubiquitin-protein ligase; required for maintenance, but not induction, of hyphal development; homozygous null mutant is avirulent in mouse systemic infection despite persistence in host; repressed in rat oral candidiasis	76.028	75.0987	72.044	75.1986	51.4388	55.2014	44.1235	43.6063
orf19.238	CCP1	Cytochrome-c peroxidase N terminus; Rim101, alkaline pH repressed; induced in low iron or by macrophage interaction; oxygen-induced activity; regulated by Sef1, Sfu1, and Hap43; Spider biofilm induced; rat catheter biofilm repressed	251.923	251.222	294.75	289.565	468.854	396.949	473.14	494.417
orf19.2381	orf19.2381	Protein of unknown function; possibly an essential gene, disruptants not obtained by UAU1 method	29.9933	27.9032	36.1051	36.1368	27.3593	26.087	29.6994	29.1946
orf19.2382	orf19.2382	Protein similar to isoleucyl-tRNA synthetase; isoleucyl-tRNA synthetase is the target of drugs including the cyclic beta-amino acid icofungipen/PLD-118/BAY-10-8888 and mupirocin	28.6134	29.8549	32.455	35.2787	24.4212	23.1723	24.4294	23.1156
orf19.2383	YKU80	Yku70p-Yku80p Ku complex subunit involved in nonhomologous end joining during double-strand break repair repair; Hap43-repressed gene; flow model biofilm induced	10.9211	9.5928	10.1664	8.71434	9.00555	9.22931	9.11893	8.79511
orf19.2384	MTG1	Putative mitochondrial GTPase; likely essential for respiratory competence and in large ribosomal subunit assembly; mitochondrial translation; Spider biofilm induced	36.2896	38.286	33.0513	34.3383	28.2348	27.4598	24.69	22.9337
orf19.2385	KTI12	Protein similar to S. cerevisiae Kti12p, which associates with Elongator complex; has a role in resistance to killer toxin; predicted Kex2p substrate; Hap43p-induced gene	48.1128	45.9457	44.5918	43.7392	43.0644	35.6481	33.0583	31.1738
orf19.2386	orf19.2386	Protein of unknown function	87.3894	88.3288	92.515	91.7079	120.6	114.534	89.7097	89.1275
orf19.2387	orf19.2387	Putative tRNA-Pro synthetase; genes encoding ribosomal subunits, translation factors, and tRNA synthetases are downregulated upon phagocytosis by murine macrophage	43.5125	47.46	46.0891	45.8615	35.7088	36.0347	38.2584	34.8283
orf19.2389	orf19.2389	Protein of unknown function	22.7738	21.6767	20.8358	21.9139	16.1985	19.9114	16.745	15.0604
orf19.239	orf19.239	Putative ATP-dependent helicase; induced by nitric oxide	45.7172	44.8586	50.1034	52.0612	42.246	34.8944	39.7139	38.3174
orf19.2391	orf19.2391	Putative protein of unknown function; Hap43p-repressed gene; <IS. cerevisiae</I ortholog YKR023W localizes to mitochondria	34.783	31.1032	25.1043	27.2019	29.9191	29.8662	32.7391	28.0591
orf19.2392	orf19.2392	Protein of unknown function	0.000198443	5.42151e-05	6.50214e-05	0.0178292	4.41389e-05	4.2128e-05	0.00022645	0.0829015
orf19.2393	orf19.2393	Putative transcription factor with zinc finger DNA-binding motif	79.0333	71.0596	64.2118	63.079	70.6866	66.5461	65.1225	63.4642
orf19.2394	orf19.2394	Protein of unknown function	1.2187	0.922801	0.614913	0.676083	1.97753	1.85918	1.64587	1.91058
orf19.2395	IME2	Putative serine/threonine protein kinase; mutation confers hypersensitivity to amphotericin B	1.16006	1.14337	1.46331	0.921448	1.10009	1.04357	0.877438	1.28132
orf19.2396	IFR2	Zinc-binding dehydrogenase; induced by benomyl, ciclopirox olamine, alpha pheromone, Hap43; regulated by oxidative stress via Cap1, osmotic stress via Hog1; protein present in exponential and stationary phase; rat catheter biofilm repressed	133.291	141.241	129.693	131.294	175.655	167.395	177.387	168.834
orf19.2397	orf19.2397	Predicted membrane transporter, member of the anion:cation symporter (ACS) family, major facilitator superfamily (MFS); amphotericin B, caspofungin repressed; Hap43p-repressed	5.38251	5.16716	5.43166	5.56847	7.44578	8.76308	9.24081	7.75409
orf19.2397.3	orf19.2397.3	Putative aminotransferase; Hap43-repressed; homozygous Tn insertion decreases colony wrinkling in filament-inducing conditions, does not block true hypha formation in liquid media; rat catheter and Spider biofilm induced	8.27076	8.60229	7.51367	6.78193	8.60652	10.4544	12.8848	9.65369
orf19.2398	orf19.2398	Protein of unknown function; Hap43-repressed; transcript increased in azole-resistant strain overexpressing CDR1 and CDR2; possibly regulated by Tac1; induced by Mnl1 in weak acid stress; flow model biofilm induced; Spider biofilm induced	13.8201	13.0954	12.2915	15.4756	12.1421	13.3309	12.4264	13.3295
orf19.2399	orf19.2399	Putative transcription factor with zinc finger DNA-binding motif; similar to bacterial DnaJ; induced in low iron	9.30003	9.55985	14.7687	15.1323	16.1398	17.1011	17.0314	17.0857
orf19.24	RTA2	Flippase; sphingolipid long chain base release; mediates calcineurin-dependent resistance to azoles; stress-associate; Plc1, Ca2+, calcineurin-regulated; ketoconazole, caspofungin induced; Spider biofilm induced; flow biofilm repressed	56.2682	62.1639	40.3584	36.5764	30.5321	31.1482	27.6386	31.1711
orf19.240	PAM17	Predicted component of the presequence translocase-associated import motor (PAM complex) involved in protein import into mitochondrial matrix	96.1452	99.6282	122.899	113.704	137.534	146.035	138.191	152.541
orf19.2400	orf19.2400	Protein of unknown function	40.0279	37.0502	36.9423	35.6569	31.8337	36.3904	33.7486	33.834
orf19.2401	orf19.2401	Protein of unknown function	6.65003	6.09696	5.01377	4.57964	7.09634	5.74374	5.68222	5.61713
orf19.2402	SSU72	Protein of unknown function	110.787	114.276	85.9916	80.6427	116.832	108.616	101.138	102.623
orf19.2404	orf19.2404	Protein of unknown function	25.6272	26.3952	24.5951	22.5249	20.5619	18.6034	17.6835	19.1591
orf19.2406	orf19.2406	Protein of unknown function	59.508	58.2465	61.2135	52.5921	64.6639	61.8182	68.1356	60.9339
orf19.2407	DPS1-1	Putative tRNA-Asp synthetase; genes encoding ribosomal subunits, translation factors, tRNA synthetases are downregulated upon phagocytosis by murine macrophage; protein enriched in stationary phase yeast cultures	232.235	229.702	264.141	255.51	195.877	191.211	191.612	192.278
orf19.2408	orf19.2408	Protein of unknown function	20.2622	19.9757	22.4255	25.1463	27.3931	27.2555	23.1816	24.5295
orf19.2410	SYS3	Protein similar to S. cerevisiae Sys3p; putative role in endosome-Golgi vesicle docking; upregulated in biofilm; induced upon adherence to polystyrene	25.3918	22.713	30.3168	28.8695	31.7848	33.0339	33.2448	31.5943
orf19.2411	SYN8	Putative endosomal SNARE; role in protein transport; rat catheter and Spider biofilm induced	31.7231	28.9394	25.7276	24.7748	30.9139	28.1277	30.0818	31.3044
orf19.2412	orf19.2412	Protein of unknown function	20.2802	18.5565	26.7462	22.4718	26.8464	28.9933	30.5838	31.7209
orf19.2414	orf19.2414	Ortholog of S. cerevisiae Mpm1; a mitochondrial intermembrane space protein of unknown function; Hap43-repressed; Spider biofilm induced	85.4736	82.0956	86.1341	88.8814	206.262	169.616	208.633	204.444
orf19.2415	orf19.2415	Protein of unknown function	26.7949	27.8226	29.9585	31.072	22.699	21.6565	21.1352	24.3206
orf19.2416.1	MLC1	Microtubule-dependent localized protein; at Spitzenkorper and cytokinetic ring in hyphae; cell-cycle dependent localization to tip polarisome, bud neck in yeast and pseudohyphae; sumoylation target; rat catheter, Spider biofilm repressed	325.944	324.778	290.544	349.686	368.685	320.09	355.972	364.095
orf19.2417	SMC5	Protein similar to S. cerevisiae Smc5p, which is involved in DNA repair; transposon mutation affects filamentous growth	17.9151	15.4421	19.44	19.6843	11.5074	10.9412	11.1932	11.2484
orf19.2418	orf19.2418	Protein of unknown function	35.7069	34.2425	32.352	37.3304	24.6698	32.3746	35.512	30.1539
orf19.2419	orf19.2419	Ortholog of S. cerevisiae Dom34; a protein that facilitates ribosomal subunit dissociation when translation is stalled; peloto ortholog; Hap43-repressed gene	72.9891	76.6067	67.7677	71.5358	78.0084	71.8813	69.1115	68.2788
orf19.242	SAP8	Secreted aspartyl protease; regulated by growth phase, temperature, white-opaque switch; highly expressed in opaque cells and upon deep epidermal invasion; greater expression in vaginal than oral infection; prominent role in biofilms	4.88851	4.09748	6.48079	6.84366	4.51944	3.91259	5.95012	3.15569
orf19.242.2	orf19.242.2	Protein of unknown function	24.3861	22.5128	35.9231	31.9288	56.1664	75.602	75.9709	85.6816
orf19.2422	ARC1	Putative G4 nucleic acid binding protein; macrophage/pseudohyphal-repressed; protein enriched in stationary phase yeast-form cultures; Spider biofilm repressed	263.884	239.58	309.762	308.836	209.302	200.464	182.514	182.942
orf19.2423	ZCF11	Zn(II)2Cys6 transcription factor; required for wild-type filamentous growth; mRNA binds She3	37.4821	34.4164	34.5405	34.6761	25.6528	25.1395	24.3383	23.4628
orf19.2425	HGT18	Putative glucose transporter of the major facilitator superfamily; the C. albicans glucose transporter family comprises 20 members; 12 probable membrane-spanning segments; expressed in rich medium with 2% glucose	30.1135	29.3467	21.8263	20.7194	27.0634	23.4562	22.4689	25.9082
orf19.2426	orf19.2426	Predicted HD domain metal dependent phosphohydrolase; Spider biofilm repressed	28.194	30.3941	36.6599	41.5282	13.8827	15.4651	13.6268	17.7459
orf19.2429	orf19.2429	Protein of unknown function; induced by alpha pheromone in SpiderM medium	0.52399	0.912586	0.377422	0.672469	1.49875	1.70643	2.37747	1.26658
orf19.243	OXR1	Protein of unknown function	42.4965	41.6699	30.7827	28.3746	68.5997	66.8875	77.1913	72.2842
orf19.2430	orf19.2430	Protein of unknown function	0	0.141745	0	0	0	0.0849011	0.0993187	0
orf19.2431	orf19.2431	Dubious open reading frame, only conserved in Candida dubliniensis; induced by alpha pheromone in SpiderM medium; mRNA binds She3; Spider biofilm induced; flow model biofilm repressed	2.81007e-155	7.36415e-27	7.0033e-46	0.312709	9.5218e-84	4.91662e-34	2.59177e-86	1.27838e-60
orf19.2432	HAC1	bZIP transcription factor; role in unfolded protein response and control of morphology; transcript undergoes atypical splicing at C terminus under ER stress; induced during mating and by caspofungin; mRNA binds She3; Spider biofilm induced	58.4534	59.8076	45.404	46.8745	86.9115	86.6216	78.3926	81.0056
orf19.2433	orf19.2433	Protein of unknown function	4.0795	2.37984	4.37381	3.8129	6.5478	9.4896	10.7573	17.0183
orf19.2434	NPL4	Putative ubiquitin-binding protein; regulated by Gcn2p and Gcn4p	28.3984	30.7477	30.3327	27.9818	32.8542	31.1524	32.3181	34.2712
orf19.2435	MSI3	Essential HSP70 family protein; required for fluconazole resistance and calcineurin-dependent transcription; interacts with Cgr1; transcript regulated by iron; rat catheter biofilm induced; farnesol repressed in biofilm; sumoylation target	253.239	240.954	278.95	277.164	304.301	268.508	300.076	301.425
orf19.2436	orf19.2436	Predicted protein serine/threonine kinase; Spider biofilm induced	1.5245	3.13594	12.839	11.6465	4.1855e-09	1.37662e-05	4.56662e-06	2.1687e-05
orf19.2437	ARC35	Putative ARP2/3 complex subunit; shows colony morphology-related gene regulation by Ssn6p; mutation confers hypersensitivity to cytochalasin D	66.6193	78.6683	68.3087	64.3111	136.547	143.799	171.231	175.671
orf19.2438	orf19.2438	Protein of unknown function	216.494	252.533	241.52	237.869	331.212	393.383	416.112	397.925
orf19.2439	orf19.2439	Fatty acid biosynthetic protein; shows colony morphology-related gene regulation by Ssn6p; protein newly produced during adaptation to the serum	85.5731	88.7893	107.182	106.755	133.243	141.733	127.346	124.448
orf19.2439.1	orf19.2439.1	Protein of unknown function	123.5	144.055	158.181	161.268	107.397	176.766	137.856	153.824
orf19.244	DCG1	Protein of unknown function; ortholog of S. cerevisiae Dcg1; transcript regulated by Nrg1 and Mig1	22.309	22.5697	25.6773	21.9394	34.8677	31.6362	38.7204	41.5098
orf19.2440	orf19.2440	S. cerevisiae ortholog Rtt101 is a cullin subunit of E3 ubiquitin ligase complex with a role in anaphase progression; induced by alpha pheromone in SpiderM medium	9.15233	8.58569	8.78398	8.16592	10.3795	11.0625	12.3547	11.3923
orf19.2442	orf19.2442	Ortholog of S. cerevisiae Shg1; a COMPASS (Set1C) complex subunit that methylates histone H3 on lysine 4 and is required in transcriptional silencing near telomeres; repressed in an azole-resistant strain overexpressing MDR1	6.65191	5.72368	7.20423	8.55456	14.2281	22.5022	23.8442	20.3037
orf19.2443	RGD1	GTPase activator protein; transcript induced in low iron; alkaline upregulated; localized to the bud emergence area in G1 phase and in the bud tip during S and G2 phases	24.4734	24.207	26.3053	26.4444	20.4371	24.3365	24.8175	24.5718
orf19.2444	CHS7	Protein required for wild-type chitin synthase III activity; similar to (but not functional homolog of) S. cerevisiae Chs7p, which effects ER export of Chs3p; induced cyr1 mutant hyphae and ras1 yeast-form cells; Spider biofilm induced	68.2729	64.6933	79.6151	78.5253	118.348	113.106	117.389	112.04
orf19.2445	orf19.2445	Putative dicarboxylic amino acid permease; fungal-specific (no human or murine homolog); induced by alpha pheromone in SpiderM medium	1.63879	1.38447	1.21108	1.07443	0.932444	1.07496	0.57486	0.934243
orf19.2446	orf19.2446	Protein of unknown function	9.98015	11.3834	17.1758	15.6923	20.0142	20.8856	27.2869	24.6517
orf19.2447	orf19.2447	Putative Type II phosphatidylinositol 4-kinase; Ssr1-repressed; flow model biofilm repressed	9.92476	9.55302	13.4953	13.466	14.7631	14.3777	16.4299	14.2143
orf19.2449	orf19.2449	Putative adhesin-like protein; macrophage-induced gene	0.365379	0.330112	0.230447	0.380057	0.508186	0.734415	0.396522	0.358008
orf19.245	DDC1	Putative DNA damage checkpoint protein; transcript induced during filamentous growth; regulated by Nrg1, Tup1	6.43268	6.37636	8.58308	7.49401	6.2628	8.27503	8.84255	8.97532
orf19.2451	PGA45	Putative GPI-anchored cell wall protein; repressed in core caspofungin response; Hog1-induced; regulated by Ssn6; Mob2-dependent hyphal regulation; flow model biofilm induced	210.047	189.506	143.821	143.305	162.948	183.596	162.705	167.237
orf19.2452	orf19.2452	Protein of unknown function; induced in high iron; repressed in core caspofungin response; ketoconazole-repressed; colony morphology-related gene regulation by Ssn6; possibly subject to Kex2 processing	53.6236	57.9908	57.3537	53.5835	77.7172	83.9752	85.446	79.3653
orf19.2454	PHO87	Putative phosphate permease; transcript repressed by Rim101 at pH 8; regulated by white-opaque switch; caspofungin repressed; virulence-group-correlated expression; flow model biofilm induced	70.7708	67.6343	73.8796	69.5381	51.9278	62.2332	55.7066	50.6295
orf19.2455	orf19.2455	Protein of unknown function	14.6653	15.5886	21.3097	21.6172	17.0787	19.1448	20.387	19.1054
orf19.2457	orf19.2457	Protein of unknown function; induced during chlamydospore formation in both C. albicans and C. dubliniensis; Spider biofilm induced	4.48518	4.27764	4.7795	4.61549	3.26195	3.26094	2.47708	2.14702
orf19.2458	SIP5	Protein of unknown function; flow model, rat catheter and Spider biofilm induced	37.6808	37.7907	26.511	26.9603	36.5006	39.9207	41.2535	41.2076
orf19.2459	orf19.2459	Protein of unknown function; mRNA binds to She3; Hap43 repressed gene; Spider biofilm induced	13.9217	13.3041	16.6055	17.4414	9.97297	11.7348	10.8065	10.2901
orf19.246	orf19.246	Predicted metalloendopeptidase; Spider biofilm induced	5.37097	5.61876	3.41722	3.38144	4.79174	4.82966	4.37682	4.29484
orf19.2460	orf19.2460	Protein of unknown function; substrate for Kex2 processing in vitro; repressed by alpha pheromone in SpiderM medium; Spider biofilm induced; Bcr1-repressed in a/a RPMI biofilms	0.535975	0.387394	1.44232	1.07041	0.931823	1.62426	1.20209	1.68052
orf19.2461	PRN4	Protein with similarity to pirins; induced by benomyl treatment; flow model biofilm repressed	16.2806	17.0052	17.497	19.3015	20.1084	18.7384	21.3292	23.109
orf19.2462	PRN3	Protein similar to pirin; induced by Mnl1 under weak acid stress; Hap43-repressed; Spider biofilm induced	5.6719	4.85662	5.87492	6.96458	7.11911	7.52908	7.80678	8.4582
orf19.2463	PRN2	Protein similar to pirin; Hap43p-repressed gene	11.4477	13.8159	11.9398	11.4436	16.0254	16.8265	14.5209	13.1687
orf19.2465	POL32	Putative subunit of DNA polymerase delta, involved in chromosomal DNA replication; cell-cycle regulated periodic mRNA expression	38.0471	40.48	45.9394	45.9397	49.0293	49.0887	50.2641	45.9949
orf19.2467	PRN1	Protein with similarity to pirins; induced by benomyl and in response to alpha pheromone in SpiderM medium; transcript induced by Mnl1 in weak acid stress; rat catheter and Spider biofilm induced	13.1606	15.0158	10.0713	9.03495	7.45905	8.05799	6.33185	5.26121
orf19.2468	orf19.2468	Protein of unknown function	0.599659	0.619177	0	0	0.278011	0.618113	0.65077	0
orf19.2469	RAD10	Ortholog of S. cerevisiae Rad10, an endonuclease involved in nucleotide excision repair; mutant is extremely sensitive to UV irradiation; transcript repressed in alkaline conditions	27.156	28.291	25.8361	25.9029	15.8408	17.9983	14.4274	16.2667
orf19.247	orf19.247	Protein of unknown function	12.8159	11.9942	12.6577	14.3858	16.763	16.3245	16.958	16.2846
orf19.2471	GIM5	Putative heterohexameric cochaperone prefoldin complex subunit; macrophage/pseudohyphal-repressed gene and macrophage-induced protein	67.7342	75.7524	106.46	98.5308	109.039	143.401	133.437	134.14
orf19.2472	orf19.2472	Ortholog of S. pombe replication termination factor Rtf2; Spider biofilm induced	25.9286	26.2077	23.8285	22.5776	33.3237	36.8081	38.8637	37.8188
orf19.2472.1	orf19.2472.1	Protein of unknown function	217.503	214.106	178.375	187.852	331.398	333.353	321.375	289.29
orf19.2473	orf19.2473	Putative RSC chromatin remodeling complex component; decreased transcription is observed upon fluphenazine treatment or in an azole-resistant strain that overexpresses CDR1 and CDR2	40.0933	39.6374	45.2522	45.9767	37.2899	35.0147	33.9695	36.6555
orf19.2474	PRC3	Putative carboxypeptidase Y precursor; transcript regulated by Nrg1 and Mig1; regulated by Gcn2 and Gcn4	78.7758	76.4991	54.3131	57.5759	81.9991	76.6265	75.1332	74.9718
orf19.2475	PGA26	GPI-anchored adhesin-like protein of the cell wall; role in cell wall integrity; required for normal virulence; induced in high iron and during cell wall regeneration; Hap43-repressed	8.63567	10.5458	4.88795	3.80032	14.8981	13.917	9.55195	10.4792
orf19.2476	orf19.2476	Protein of unknown function	21.7891	18.5759	20.5174	20.1355	18.891	17.4387	20.2031	18.7763
orf19.2478	orf19.2478	Protein of unknown function	7.90164	7.17413	12.545	11.9601	13.2164	10.827	13.4541	13.0283
orf19.2478.1	orf19.2478.1	60S ribosomal protein L7; snoRNA snR39b encoded within the 2nd intron	1910.08	1821.61	2504.52	2436.9	1483.98	1583.14	1490.47	1441.73
orf19.2479	UGA4	Putative gamma-aminobutyric acid/polyamine permease; nitrogen catabolite repressed gene, induced in absence of preferred N sources; transcriptionally induced upon phagocytosis by macrophage; gene regulation by nitrogen source requires Gat1p	6.07602	4.40602	4.29049	5.63502	5.22531	5.07733	4.89929	3.85383
orf19.248	APL5	Ortholog of S. cerevisiae and S. pombe Apl5; subunit of the AP-3 adaptor complex involved in Golgi-to-vacuole transport; phosphorylated protein; mutant is viable;	26.7537	24.5077	28.062	27.2693	42.1707	40.6239	44.7103	41.0672
orf19.2480.1	AUT7	Putative autophagosome protein; macrophage/pseudohyphal-repressed; alternatively spliced intron in 5' UTR; Spider biofilm induced	2.67142	2.20807	1.40526	2.08242	3.02737	2.55188	2.5121	1.24197
orf19.2481	orf19.2481	Protein of unknown function; Spider biofilm induced	1.45165	0.545055	0.776844	0.658895	1.37661	1.3875	1.62312	0.931003
orf19.2483	RIM1	Putative single-stranded DNA-binding protein; protein level decreases in stationary phase cultures; rat catheter biofilm repressed	416.496	448.792	313.934	313.902	357.535	287.198	269.861	278.521
orf19.2484	orf19.2484	Protein of unknown function	133.8	149.07	107.459	103.175	122.168	113.308	114.042	114.86
orf19.2485	orf19.2485	Protein of unknown function	49.7269	50.3136	57.855	57.3198	44.2513	43.5114	47.0168	43.9973
orf19.2487	orf19.2487	Protein with a predicted phosphoribulokinase/uridine kinase domain; Spider biofilm induced	46.141	42.0504	52.203	47.9296	39.5481	49.7296	45.8162	43.0262
orf19.2488	FAL1	eIF4A subfamily of DEAD-box ATP-dependent RNA helicases; predicted nucleolar protein required for maturation of 18S rRNA; Spider biofilm induced	100.288	92.5067	79.4114	89.5217	74.1959	76.0352	69.6237	60.3019
orf19.2489	orf19.2489	Putative karyopherin beta; repressed by nitric oxide	128.846	131.099	147.903	145.311	105.091	97.9237	90.9202	89.5489
orf19.2492	STE3	Protein similar to S. cerevisiae Ste3p, the receptor for a-factor mating pheromone; alpha mating-type-specific transcription	0	0	0	0	0	0	0	0
orf19.2494	orf19.2494	Protein of unknown function	16.1269	13.3134	15.6404	16.0618	12.1403	11.432	11.8666	11.2824
orf19.2495	GSL1	Beta-1,3-glucan synthase subunit; 10 predicted transmembrane regions; caspofungin induced; repressed by yeast-to-hypha transition; young biofilm repressed, induced by biofilm drug exposure; Bcr1-repressed in RPMI a/a biofilms	3.79584	3.25304	3.94001	3.71847	3.68897	3.87405	4.49282	3.58543
orf19.2496	ATO2	Putative fungal-specific transmembrane protein; fluconazole repressed, Hap43-repressed; flow model biofilm induced; Spider biofilm induced	63.5666	57.4311	60.3853	63.3652	94.3976	80.6749	88.2535	107.21
orf19.2498	orf19.2498	Predicted ubiquitin-protein ligase; Hap43-repressed gene; oxidative stress-induced via Cap1; flow model biofilm induced	67.2089	66.6636	55.1698	55.2596	40.3803	43.5999	40.5304	36.7142
orf19.2499	orf19.2499	Putative peptidyl-prolyl cis-trans isomerase	33.1817	33.6687	33.3018	33.7474	38.8554	45.207	43.6205	40.7032
orf19.25	orf19.25	Protein of unknown function	67.6506	69.5075	72.2716	68.3179	59.417	54.7012	52.6304	49.4933
orf19.250	SLC1	Putative fatty acyltransferase; protein repressed during the mating process	28.9675	29.3879	35.8485	32.9469	59.5543	66.6936	75.228	73.5233
orf19.2500	orf19.2500	Protein of unknown function	14.2643	13.7514	14.7811	14.1201	13.5868	15.3862	12.3254	13.5659
orf19.2501	FLC1	Protein involved in heme uptake; putative FAD transporter, similar to S. cerevisiae Flc1; regulated by iron; macrophage-induced; mutant defective in filamentous growth; Spider biofilm induced	24.1207	22.7319	22.3606	21.5857	19.5758	23.3412	21.1932	18.0311
orf19.2503	orf19.2503	Protein of unknown function	0.544423	0.702678	0.801199	0.566293	1.60907	1.64144	1.18165	1.86704
orf19.2504	BMS1	Putative GTPase; Hap43-induced gene; mutation confers resistance to 5-fluorocytosine (5-FC); flucytosine induced; repressed by prostaglandins; Spider biofilm induced	72.0457	66.5997	68.2448	69.7244	70.5409	65.557	58.1409	54.6453
orf19.2505	orf19.2505	Protein of unknown function	0	1.37027	4.46398	1.10431	0.92288	3.283	1.44019	2.60061
orf19.2506	orf19.2506	Protein of unknown function; opaque-specific transcript; induced during chlamydospore formation in both C. albicans and C. dubliniensis; Hog1-repressed; Spider biofilm induced	13.9114	12.7639	16.8808	17.2261	14.3446	15.5414	14.6032	13.9995
orf19.2507	ARP9	Protein similar to S. cerevisiae Arp3p, a component of the Arp2/3 complex involved in actin-dependent processes; likely to be essential for growth, based on an insertional mutagenesis strategy	24.286	22.9828	30.4991	30.6016	40.0595	41.868	45.5104	46.4904
orf19.2508	PRM9	Protein described a similar to S. cerevisiae Prm9; not the ortholog though; mutant is viable	2.18028	2.40137	3.39375	2.6566	6.16606	6.12418	7.50031	6.58092
orf19.2509	orf19.2509	Protein of unknown function	0.000194404	5.67473e-06	0.503566	2.22864	4.81919e-05	1.59028	0.00589401	2.55251
orf19.2509.1	orf19.2509.1	Protein of unknown function	5.91422	6.18936	4.40844	4.49799	9.94418	10.7847	14.5275	12.7057
orf19.251	GLX3	Glutathione-independent glyoxalase; binds human immunoglobulin E; alkaline, fluconazole, Hog1 repressed; hypoxia, oxidative stress via Cap1, Hap43 induced; stationary-phase enriched; rat catheter, Spider biofilm induced	1357.02	1418.08	846.999	870.761	2088.17	1802.45	2316.63	2120.31
orf19.2510	orf19.2510	Protein of unknown function	6.67828	8.10949	6.05776	5.34911	12.2281	13.2107	17.2456	17.2926
orf19.2511.1	MRPL33	Putative mitochondrial ribosomal protein of the large subunit; Ssr1-repressed; rat catheter biofilm induced	87.8289	93.1596	80.9024	86.5745	182.495	170.55	179.936	160.624
orf19.2511.2	orf19.2511.2	Protein of unknown function	26.2222	28.3057	36.2184	32.1789	52.5186	68.1615	71.6279	77.8353
orf19.2512	orf19.2512	Protein of unknown function	11.912	12.4731	16.5577	15.2943	25.522	27.359	31.7341	35.029
orf19.2513	orf19.2513	Protein of unknown function	2.43965	2.33106	2.44967	2.57553	2.10174	3.24287	3.79356	3.45363
orf19.2514	orf19.2514	Predicted methyltransferase; rat catheter biofilm induced	12.287	11.1854	15.294	15.0832	15.2418	17.7839	19.0393	19.3858
orf19.2515	orf19.2515	ZZ-type zinc finger protein; rat catheter and Spider biofilm induced	38.8079	38.0689	23.993	22.1513	68.6736	64.346	64.4109	64.6614
orf19.2516	orf19.2516	Protein of unknown function	38.2081	39.5828	38.9688	37.6655	81.9751	78.5866	93.9218	112.332
orf19.2517	orf19.2517	Predicted membrane transporter, member of the drug:proton antiporter (12 spanner) (DHA1) family, major facilitator superfamily (MFS)	0.993207	0.666597	0.876991	0.78516	1.62314	1.65851	1.04193	1.28458
orf19.2518	orf19.2518	Protein of unknown function	110.228	109.001	123.075	122.834	146.052	148.248	156.927	151.859
orf19.2519	orf19.2519	Protein of unknown function	18.6165	14.188	24.7255	23.9749	27.0229	28.6013	30.7859	31.5017
orf19.252	orf19.252	Protein of unknown function; S. cerevisiae ortholog Fmp37 which localizes to mitochondria; Hap43-repressed; Spider biofilm repressed	23.9134	26.3601	22.8953	17.4118	45.5638	48.7157	57.3976	53.5113
orf19.2520	orf19.2520	Protein of unknown function	114.13	106.839	129.279	131.815	110.558	103.495	104.876	110.607
orf19.2521	orf19.2521	Protein of unknown function	15.0496	16.5814	13.2148	13.8666	10.7602	8.88045	10.0097	12.9096
orf19.2524	MGE1	Putative mitochondrial matrix cochaperone; macrophage/pseudohyphal-repressed	154.951	147.187	154.334	144.495	177.349	176.476	167.638	168.954
orf19.2525	LYS12	Homoisocitrate dehydrogenase; catalyzes 4th step in the alpha-aminoadipate pathway of lysine biosynthesis; clade-associated gene expression; protein level decreases in stationary phase cultures; Spider biofilm repressed	466.942	484.522	410.943	425.687	291.786	235.274	212.157	234.952
orf19.2527	orf19.2527	Putative protein of unknown function; Hap43-induced; required for normal biofilm growth; F-12/CO2 early biofilm induced	99.44	98.2396	83.0634	88.7914	72.8988	65.7673	60.0335	49.1973
orf19.2528	orf19.2528	Putative RNA polymerase III transcription factor (TFIIIB) subunit; flucytosine repressed	53.6352	50.7658	48.7087	53.4728	37.7322	31.1775	28.8118	30.4406
orf19.2529	orf19.2529	Ortholog of S. cerevisiae Gpa15; involved in the synthesis of glycosylphosphatidylinositol (GPI) anchors; shuman Pig-H, which is also involved in GPI assembly; Spider biofilm induced	40.0388	38.2679	52.4048	50.7456	64.7549	61.8429	65.8203	78.3011
orf19.2529.1	orf19.2529.1	Protein of unknown function; Spider biofilm repressed	120.193	112.537	139.679	99.3368	278.781	288.688	305.773	267.108
orf19.2530	orf19.2530	Dubious open reading frame	1.09876	0	0.461997	0	1.52821	2.03863	1.58988	2.15319
orf19.2531	CSP37	Hyphal cell wall protein; role in progression of mouse systemic infection; predicted P-loop, divalent cation binding, N-glycosylation sites; expressed in yeast and hyphae; hyphal downregulated; stationary-phase enriched; GlcNAc-induced	722.853	693.045	366.987	332.84	1174.17	990.301	1061.23	1070.89
orf19.2532	PRS	Putative prolyl-tRNA synthetase; monofunctional Class II synthetase; gene is constitutively expressed	24.5631	23.8347	24.5669	24.556	32.1937	28.8663	33.4318	31.1842
orf19.2533.1	orf19.2533.1	Protein with a predicted role in protein translocation from the endoplasmic reticulum	117.858	125.51	124.753	129.085	127.154	140.004	157.317	161.028
orf19.2534	PIN4	Protein with similarity to S. cerevisiae Pin4p; transposon mutation affects filamentous growth	34.3052	33.0013	38.4295	40.0827	22.9276	27.0623	28.0107	25.8038
orf19.2537	orf19.2537	Protein of unknown function; transcript detected on high-resolution tiling arrays	0.69013	0	1.19944	3.38741	0.358357	0.637398	2.23692	0.403929
orf19.2538	PTC2	Protein phosphatase of the Type 2C-related family (serine/threonine-specific) with a potential role in DNA damage checkpoint control; localizes to both cytoplasm and mitochondria; mutant shows virulence defect	78.8693	72.2239	63.9185	65.0884	69.9623	64.6265	61.9799	57.5055
orf19.2539	orf19.2539	Protein of unknown function; transcript detected on high-resolution tiling arrays	2.0868e-209	2.59379e-47	0.380995	4.82629e-31	6.71885e-232	0	0	9.56124e-120
orf19.254	orf19.254	Protein of unknown function; Hog1p-repressed; Spider biofilm induced	20.1488	18.7372	10.9549	10.6387	7.78031	7.18024	8.49639	5.53343
orf19.2540	SAS3	Similar to silencing proteins; increased transcription is observed upon fluphenazine treatment; rat catheter biofilm repressed	14.2151	12.7138	14.9906	16.0019	12.9171	12.9806	12.8282	13.0144
orf19.2541	orf19.2541	Protein of unknown function	18.911	19.8335	22.3543	21.3285	29.9002	32.1814	35.4949	35.0043
orf19.2542	orf19.2542	Protein of unknown function	7.71718	8.37491	15.4296	16.3165	24.4787	40.1305	37.26	32.6533
orf19.2544	orf19.2544	Protein of unknown function	21.2902	23.3906	29.585	32.57	29.9274	30.5496	31.3223	29.8664
orf19.2545	DOT6	Protein with a predicted role in telomeric gene silencing and filamentation; repressed by high-level peroxide stress; Spider biofilm induced	49.0451	42.9913	40.408	42.145	26.1144	28.1726	26.0635	24.2822
orf19.2546	TRP2	Putative anthranilate synthase with a predicted role in tryptophan biosynthesis; regulated by Gcn2p and Gcn4p	70.8209	65.2962	102.004	106.03	83.7375	73.4847	76.1287	78.2059
orf19.2547	orf19.2547	Protein of unknown function	8.70708	8.35195	11.212	10.189	7.25924	7.48089	6.26369	6.86391
orf19.2549	SHP1	Regulator of the type 1 protein phosphatase Glc7p activity, involved in control of morphogenesis, progression through the cell cycle and response to DNA damage	117.987	123.85	125.702	117.165	124.39	117.549	129.41	123.971
orf19.255	ZCF1	Zn(II)2Cys6 transcription factor; transcript regulated during hypha formation; 5'-UTR intron; mutants show decreased colonization of mouse kidneys; flow model biofilm induced; Spider biofilm induced	9.82601	9.13911	5.35672	5.78148	3.96742	4.47938	3.99238	4.49244
orf19.2551	MET6	Essential 5-methyltetrahydropteroyltriglutamate-homocysteine methyltransferase (cobalamin-independent methionine synthase); antigenic in murine/human systemic infection; heat shock, estrogen, GCN-induced; Spider biofilm repressed	420.143	397.899	348.215	354.429	331.887	278.112	287.137	280.872
orf19.2552	orf19.2552	Protein similar to S. cerevisiae Pmr1p; amphotericin B induced; previously merged with orf19.2553; unmerged from orf19.2553 in a revision of Assembly 21	0	0	0	0	0	0	0	0
orf19.2553	orf19.2553	Protein similar to S. cerevisiae Pmr1p; amphotericin B induced; previously merged with orf19.2552 in Assembly 20; unmerged from orf19.2552 in a revision of Assembly 21	0.0829392	0.171277	0	0	0	0.10259	0.0600056	0
orf19.2555	URA5	Putative orotate phosphoribosyltransferase; protein abundance is affected by URA3 expression in the CAI-4 strain background; flucytosine induced; protein level decreased in stationary phase cultures	128.132	146.905	114.057	109.466	171.281	155.957	162.192	180.265
orf19.2557	SEC65	Component of the protein-targeting Signal Recognition Particle (SRP); similar to mammalian Srp19; functional homolog of S. cerevisiae Sec65; Tbf1-induced	111.064	113.273	117.088	111.896	129.615	128.228	127.888	129.62
orf19.2558	orf19.2558	Protein of unknown function	14.7079	13.7796	16.2806	13.4121	14.1169	14.618	15.6046	20.4795
orf19.2559	CDC4	F-box subunit of SCF(CDC4) ubiquitin ligase; functional homolog of S. cerevisiae Cdc4; mutation/depletion causes hyperfilamentation; Sol1 is a substrate of SCF-Cdc4; Spider biofilm induced	89.4919	81.5585	84.5866	81.3772	83.0805	79.1946	79.5796	79.7434
orf19.2560	CDC60	Cytosolic leucyl tRNA synthetase; conserved amino acid and ATP binding class I signature, tRNA binding, proofreading motifs; likely essential for growth; interacts with benzoxaborole antifungals; present in exponential and stationary phase	173.593	174.019	211.917	210.131	122.781	110.317	113.985	122.276
orf19.2563	orf19.2563	Protein of unknown function	22.9186	19.7932	21.205	23.3779	17.0949	17.7179	15.951	15.7504
orf19.2564	orf19.2564	Putative nucleolar protein; implicated in ribosome biogenesis; rat catheter biofilm repressed	33.1368	36.666	43.2961	40.6398	40.4382	39.4634	39.3624	36.9941
orf19.2565	orf19.2565	Predicted intermediate filament protein; required for nuclear and mitochondrial transmission to daughter buds in S. cerevisiae; Spider biofilm induced	13.5458	15.9673	14.5975	13.3411	19.5812	17.1946	20.6799	20.475
orf19.2568	IFU5	Predicted membrane protein; estradiol-induced; upregulation associated with CDR1 and CDR2 overexpression or fluphenazine; putative drug-responsive regulatory site; similar to S. cerevisiae Wwm1p; Hap43-repressed; Spider biofilm repressed	282.977	291.148	230.809	256.038	171.522	177.501	153.416	172.602
orf19.257	orf19.257	Transcription is negatively regulated by Sfu1p; repressed by nitric oxide	2.09441	2.00811	2.64191	1.74283	2.49685	3.79342	4.1129	3.86977
orf19.2570	MCI4	Putative NADH-ubiquinone dehydrogenase; Hap43p-repressed gene	191.665	192.406	246.488	225.348	331.22	422.003	421.105	431.542
orf19.2571	SEC4	Small GTPase of Rab family; role in post-Golgi secretion; possible C-terminal palmitoylation; downregulated on adherence to polystyrene; localizes to the Spitzenkorper during hyphal growth; functional homolog of S. cerevisiae Sec4p	148.415	156.309	141.298	147.064	177.311	158.567	162.488	174.075
orf19.2573	FRS1	Phenylalanyl-tRNA synthetase; possible role in early cell wall biosynthesis; downregulated by phagocytosis by macrophages; possibly essential gene, disruptants not obtained by UAU1 method; protein present in exponential and stationary phase	230.263	221.18	243.987	247.69	170.73	159.101	152.125	158.733
orf19.2574	orf19.2574	Protein of unknown function	37.5803	33.8908	29.7697	32.7893	32.562	26.9753	28.1291	27.1247
orf19.2575	orf19.2575	Putative S-adenosylmethionine-dependent methyltransferase; Hap43p-induced gene	32.7253	34.7709	37.2872	38.2949	21.4371	22.3627	20.3967	20.0979
orf19.2579	orf19.2579	Msh4 ortholog of S. cerevisiae; involved in meiotic recombination and is required for normal levels of crossing over; Spider biofilm induced	16.6752	16.7379	14.3096	12.5865	13.5794	13.476	13.4323	13.2654
orf19.258	orf19.258	Protein of unknown function; Spider biofilm induced	0.645576	1.19986	1.19436	0.859532	1.07748	1.1978	0.747307	1.61933
orf19.2580	HST2	Putative histone deacetylase; role in regulation of white-opaque switch; Spider biofilm induced	15.6592	13.6281	12.6041	13.2788	11.7195	12.0828	13.8649	11.5732
orf19.2581	orf19.2581	Protein with a predicted epimerase/dehydratase domain; Hap43-repressed gene	7.96215	6.72652	8.52181	7.30322	9.24941	9.0652	6.93882	8.29798
orf19.2582	orf19.2582	Protein of unknown function	42.807	39.9413	44.1035	44.475	40.4551	38.0107	38.8699	38.2116
orf19.2583	PTR2	Oligopeptide transporter involved in uptake of di-/tripeptides; highly induced during chlamydospore formation in both C. albicans and C. dubliniensis	0.343693	0.31052	0.252898	0.10725	0.298765	0.557975	0.341905	0.538814
orf19.2583.1	orf19.2583.1	0	0.390507	0.403217	0	0.649911	0.678919	0	0.141264	0.459154
orf19.2583.2	orf19.2583.2	0	12.6103	8.2859	12.5326	12.4014	8.76947	4.254	2.4882	4.49304
orf19.2584	OPT9	0	7.33936	8.81831	5.94754	4.99692	2.50558	2.47589	1.7378	2.51041
orf19.2585	orf19.2585	Protein of unknown function	6.77658	4.61513	4.36497	3.35943	20.4546	18.7261	22.1147	13.7883
orf19.2587	HNM3	Putative transporter; Hap43, flucytosine repressed; possibly essential, disruptants not obtained by UAU1 method; Spider biofilm induced	4.85067	4.54384	3.40628	3.78675	3.96446	3.92779	3.97974	2.86148
orf19.259	orf19.259	Protein with a predicted role in 60S ribosomal subunit assembly; flow model biofilm induced	23.918	24.794	32.9927	29.8939	27.678	32.9759	25.5804	23.2687
orf19.2590	orf19.2590	Putative dethiobiotin synthetase; transcript upregulated in clinical isolates from HIV+ patients with oral candidiasis; Hap43-repressed; GlcNAc-induced protein; Spider biofilm induced	3.86265	3.16319	4.48036	4.98764	2.87143	3.29505	1.9273	1.6705
orf19.2591	orf19.2591	Protein of unknown function	3.44887	2.60018	1.10488	1.32108	0.647193	0.812572	0.71292	0.300381
orf19.2593	BIO2	Putative biotin synthase; induced by high iron; repressed by ciclopirox olamine; upregulated in clinical isolates from HIV+ patients with oral candidiasis; Hap43-repressed; Spider biofilm induced	46.115	47.4077	29.509	31.3816	45.9537	37.2096	32.1478	33.7765
orf19.2594	orf19.2594	Protein of unknown function	81.4616	90.3143	86.7847	87.5843	51.0971	56.8422	47.3822	53.0611
orf19.2597	MRS2	Putative magnesium ion transporter, mitochondrial; fungal-specific (no human or murine homolog)	19.6148	19.5371	21.2602	21.5802	19.7536	22.9299	20.7663	19.4112
orf19.2598	VMA4	H+ transporting ATPase E chain; transcript regulated by Mig1; caspofungin repressed; protein level decreases in stationary phase cultures; rat catheter biofilm repressed	370.695	348.831	326.352	326.817	451.447	487.567	515.604	443.788
orf19.2599	CRC1	Mitochondrial carnitine carrier protein	61.8125	59.6922	59.1889	63.6102	54.5397	50.484	52.148	49.4038
orf19.26	orf19.26	Putative peptide N-glycanase; induced by nitric oxide independent of Yhb1p	35.4216	40.0764	38.6604	41.7572	44.9422	43.581	47.1649	47.8021
orf19.260	SLD1	Sphingolipid delta-8 desaturase; catalyzes desaturation at C8 in the long-chain base moiety of ceramides in glucosylceramide synthesis, important for virulence; ketoconazole and hypoxia induced; Hap43-repressed; Spider biofilm induced	101.761	102.895	92.3002	89.3895	126.071	131.385	135.491	131.017
orf19.2600	SPC98	Putative component of the microtubule-nucleating Tub4p (gamma-tubulin) complex; periodic mRNA expression, peak at cell-cycle S/G2 phase	10.7989	11.2441	11.0145	10.3706	11.3594	12.0105	14.5097	13.3256
orf19.2601	HEM1	Putative 5-aminolevulinate synthase; caspofungin repressed; induced by high iron, nitric oxide; regulated by Ssn6; Hap43-repressed; Spider biofilm induced	150.016	139.518	137.701	136.791	100.714	100.224	89.838	93.0883
orf19.2602	OPT1	Oligopeptide transporter; transports 3-to-5-residue peptides; alleles are distinct, one has intron; suppresses S. cerevisiae ptr2-2 mutant defects; induced by BSA or peptides; Stp3p, Hog1p regulated; flow model biofilm induced	30.2921	24.9053	23.0611	22.431	12.0641	10.4402	8.64089	9.02196
orf19.2604	orf19.2604	S. pombe ortholog SPAC2C4.06c is a predicted tRNA (cytosine-5-)-methyltransferase; Spider biofilm induced	45.3573	43.9624	37.2228	39.5263	35.2198	33.9723	30.7378	25.4058
orf19.2605	PRK1	Putative protein serine/threonine kinase; mutants sensitive to growth on hydrogen peroxide medium	59.4604	55.7651	60.4089	58.0312	57.4186	59.1067	58.5726	58.4457
orf19.2606	HDA1	Histone deacetylase; inducer of filamentation; conserved deacetylation motif; regulates white-to-opaque switch frequency but not opaque-to-white switch; greater expression in white cells than opaque cells; inhibited by trichostatin-A;	26.9132	23.9273	32.5698	32.6573	24.4082	25.5121	25.609	25.6426
orf19.2607	orf19.2607	Protein of unknown function; Spider biofilm induced	23.8402	24.6162	38.869	39.0404	36.929	36.0655	38.318	42.0058
orf19.2608	ADH5	Putative alcohol dehydrogenase; regulated by white-opaque switch; fluconazole-induced; antigenic in murine infection; regulated by Nrg1, Tup1; Hap43, macrophage repressed, flow model biofilm induced; Spider biofilm induced	1489.62	1552.67	629.866	680.498	1335.11	1117.93	1055.92	1029.55
orf19.2609	CET1	mRNA 5'-triphosphatase; large subunit of mRNA capping enzyme; positively regulates Ceg1 activity; functional homolog of S. cerevisiae Cet1; Cet1 and Cgt1 form a 2:1 complex; flow model biofilm induced	101.499	92.0869	87.1865	91.0425	73.4829	72.381	68.019	66.0468
orf19.261	orf19.261	Protein of unknown function	28.9213	25.5529	29.9616	26.1773	44.4405	41.8711	44.3811	44.3659
orf19.2610	orf19.2610	Putative tRNA binding protein; intron-containing gene; Spider biofilm induced	99.1026	105.62	77.2784	74.2779	83.8585	76.9785	68.8918	66.2746
orf19.2611	MCM6	Putative MCM DNA replication initiation complex component; mRNA expression peak at cell-cycle M/G1 phase; regulated by tyrosol and cell density; repressed by alpha pheromone in SpiderM medium; Hap43-induced gene	43.7832	43.4749	49.8018	48.1583	28.6872	24.5594	24.4892	26.4679
orf19.2612	orf19.2612	C2H2 zinc finger transcription factor; expression reduced in ssr1 null mutant; flow model biofilm induced	31.3169	32.7853	32.9196	35.7419	20.5686	26.4298	22.1854	17.8996
orf19.2613	ECM4	Cytoplasmic glutathione S-transferase; regulated by Nrg1, Tup1; induced in core stress response, in cyr1 or ras1 mutant (yeast or hyphal cells); Tn mutation affects filamentous growth; stationary phase enriched; Spider biofilm induced	220.641	245.144	184.554	185.386	225.444	200.614	211.029	206.888
orf19.2614	RSR1	RAS-related protein; GTP/GDP cycling required for wild-type polar bud site selection, hyphal growth guidance; role in systemic virulence in mouse; geranylgeranylation predicted; suppresses S. cerevisiae cdc24-4 mutant heat sensitivity	113.863	107.992	126.058	135.942	84.8468	91.1951	99.55	95.4712
orf19.2615	MDL1	Putative mitochondrial, half-size MDR-subfamily ABC transporter	31.6297	32.035	41.6107	39.8776	44.1691	40.3045	46.9877	43.5504
orf19.2616	UGT51C1	UDP-glucose:sterol glucosyltransferase; enzyme of sterol glucoside (membrane-bound lipid) biosynthesis; has UDP-sugar binding domain; activity is UDP-glucose-specific in vitro; enzyme does not use UDP-mannose; Mig1-regulated	13.5702	12.5263	12.7316	12.2582	10.7218	10.2937	10.9298	11.1882
orf19.2618	MET2	Homoserine acetyltransferase; Hap43p-, Gcn4p-regulated; macrophage/pseudohyphal-repressed; not highly biofilm induced, in contrast to many sulfur amino acid metabolic genes; no human or murine homolog; virulence-group-correlated expression	105.219	108.792	157.757	146.336	112.749	111.674	105.399	115.873
orf19.2619	PHO113	Putative constitutive acid phosphatase; Rim101-repressed; DTT-extractable; N-glycosylated; possibly an essential gene, disruptants not obtained by UAU1 method	7.42067	7.70754	10.1175	8.29425	6.22925	5.81145	6.44889	6.19537
orf19.262	SMC3	Protein similar to S. cerevisiae Smc3p, which is an ATPase involved in sister chromatid cohesion; likely to be essential for growth, based on an insertional mutagenesis strategy	14.5942	13.3675	17.0317	17.9604	12.5518	13.5328	13.8915	14.5993
orf19.2620	orf19.2620	Protein of unknown function	9.49514	11.3361	6.86199	4.56792	11.6587	9.4509	10.4118	8.60581
orf19.2621	orf19.2621	Protein of unknown function	86.2546	101.394	112.336	95.5169	157.649	193	190.093	193.993
orf19.2622	YPT31	Protein required for resistance to toxic ergosterol analog	94.0141	92.3935	106.481	107.942	159.243	152.704	159.448	149.556
orf19.2623	ECM22	Zn(II)2Cys6 transcription factor; rat catheter and Spider biofilm induced	20.3738	16.5951	13.4686	15.2858	14.7273	14.0973	15.7242	12.9255
orf19.2624	orf19.2624	Protein of unknown function; downregulated by fluphenazine treatment or in an azole-resistant strain that overexpresses CDR1 and CDR2	0.132704	0.182697	0.297589	0.110428	0.276855	0.355647	0.160016	0.0693474
orf19.2625	orf19.2625	Protein of unknown function	0	0	0	0	0	0	0	0
orf19.2629	USO1	Protein of unknown function	42.8723	38.5884	53.7034	52.6108	34.2247	32.7733	40.4655	37.3733
orf19.263.1	orf19.263.1	Protein of unknown function; gene has intron; Spider biofilm induced	415.784	455.511	605.376	562.712	370.711	469.874	328.108	423.536
orf19.2630	RAD59	Protein involved in homologous recombination and DNA breaks repair; similar to S. cerevisiae Rad59p; N-terminal similarity with Rad52p	29.0236	27.7613	32.0699	33.1383	43.0272	52.1804	49.7285	44.6191
orf19.2631	orf19.2631	Subunit of Elongator complex; required for modification of wobble nucleosides in tRNA in S. cerevisiae; Hap43-induced gene	30.776	27.0334	33.4628	31.987	27.4311	25.307	25.7283	23.4173
orf19.2633	HGT14	Putative MFS glucose transporter; 20 member C. albicans glucose transporter family; 12 probable membrane-spanning segments; expressed in rich medium with 2% glucose; rat catheter and flow model biofilm induced	4.90371	5.44625	4.15838	4.38917	3.18089	4.12864	3.45834	2.90709
orf19.2633.1	orf19.2633.1	Protein of unknown function	5.02186	5.18531	6.65949	5.30396	5.77575	3.10584	3.0743	4.54204
orf19.2637	orf19.2637	Protein of unknown function	13.5491	18.9643	18.4203	19.7933	13.9241	13.4539	13.3424	14.4558
orf19.2638	orf19.2638	Protein of unknown function; Spider biofilm induced	0.788548	0.30533	1.40914	1.4764	1.09675	1.58499	1.21233	1.62254
orf19.2639	orf19.2639	Protein of unknown function	62.2147	67.5308	97.887	96.6657	73.8059	93.894	81.4822	74.0305
orf19.2639.1	orf19.2639.1	Lsm (Like Sm) protein; predicted role in involved in mRNA decay; Spider biofilm repressed	247.77	243.578	265.525	237.065	430.277	461.174	468.912	448.841
orf19.264	orf19.264	Protein of unknown function	7.63025	7.07175	8.58122	8.52963	8.88637	8.86951	10.0431	9.54805
orf19.2640	FUR1	Uracil phosphoribosyltransferase; predicted tetrameric enzyme of pyrimidine salvage; mutations associated with flucytosine resistance in clade I clinical isolates; flucytosine, macrophage-induced protein; levels decrease in stationary phase	64.4174	64.2375	73.7504	62.0325	84.5201	73.865	74.0464	77.6129
orf19.2641	ARP1	Putative centractin; induced upon adherence to polystyrene	11.0041	12.021	15.4231	13.8903	17.782	16.5046	18.7304	19.2933
orf19.2642	orf19.2642	Protein of unknown function	10.1606	9.80107	14.0534	11.2362	14.6896	14.8004	14.0251	16.6625
orf19.2643	RPO26	Putative RNA polymerase subunit; heterozygous null mutant exhibits resistance to parnafungin in the C. albicans fitness test	121.127	117.909	161.053	143.305	129.084	129.882	114.393	122.76
orf19.2644	QCR2	Ubiquinol-cytochrome-c reductase; antigenic; induced by interaction with macrophage; repressed by nitric oxide; in detergent-resistant membrane fraction (possible lipid raft component); levels decrease in stationary phase; Hap43p-repressed	234.221	240.225	291.671	288.366	266.829	286.096	290.036	272.298
orf19.2645	orf19.2645	Protein of unknown function	0	0	0	0	0	0	0.435304	0.943254
orf19.2646	ZCF13	Predicted Zn(II)2Cys6 transcription factor; similar to but not the true ortholog of S. cerevisiae Hap1; mutants display decreased colonization of mouse kidneys	14.3281	13.6643	12.1997	11.9726	13.8252	15.3228	16.8019	15.8485
orf19.2647	ZCF14	Putative Zn(II)2Cys6 transcription factor; caspofungin induced	4.85962	4.34078	4.02179	4.52528	5.98116	6.46421	8.0363	9.58361
orf19.2649	PCL1	Cyclin homolog; transcript induced by filamentous growth; induced by alpha pheromone in SpiderM medium	9.6765	8.2707	9.58402	7.60483	7.17788	10.5727	9.99565	10.1976
orf19.265	orf19.265	Protein with a ribonuclease III domain; flow model biofilm induced; Spider biofilm induced	0.661985	0.512648	0.649472	0.642672	1.95653	2.38825	3.55213	2.46479
orf19.2650	orf19.2650	Protein of unknown function; rat catheter biofilm induced	10.0809	10.2259	10.8392	10.7011	16.2002	16.8574	18.2229	19.4886
orf19.2650.1	orf19.2650.1	Mitochondrial ribosomal protein of the small subunit; Spider biofilm repressed	49.9493	49.7898	69.9536	60.7484	44.2215	48.7141	39.3346	62.9464
orf19.2651	CAM1-1	Putative translation elongation factor; downregulated upon phagocytosis by murine macrophages; Hap43-induced gene; Spider biofilm repressed	175.644	161.37	190.33	180.281	203.089	209.896	207.461	216.443
orf19.2652	TEF4	Putative translation elongation factor; genes encoding ribosomal subunits, translation factors, and tRNA synthetases are downregulated upon phagocytosis by murine macrophage	1.18935	1.38157	1.1252	1.23713	3.10164	2.20672	1.93609	2.33072
orf19.2653	orf19.2653	Protein with a transient receptor potential (TRP) ion channel domain; mutants are viable; rat catheter and Spider biofilm induced; flow model biofilm repressed	8.5226	8.43616	8.14853	7.14694	8.05556	7.39563	8.14168	7.76805
orf19.2654	RMS1	Putative lysine methyltransferase; Hap43-induced; protein induced during mating; possibly essential, disruptants not obtained by UAU1 method; rat catheter and Spider biofilm induced	20.0958	19.1084	26.1203	25.1685	31.0967	28.1595	27.1023	25.3379
orf19.2655	BUB3	Protein similar to S. cerevisiae Bub3; a kinetochore checkpoint component; induced by hydroxyurea treatment; flow model biofilm induced; Spider biofilm induced	30.2309	30.8492	28.2512	25.0457	47.4023	44.2644	48.4188	45.4159
orf19.2657	orf19.2657	Protein of unknown function	1.08237	1.00198	1.381	1.33549	1.2199	0.946399	1.16112	1.37503
orf19.2660	EAF3	Subunit of the NuA4 histone acetyltransferase complex; rat catheter and Spider biofilm induced	17.6182	19.8567	17.3444	15.7762	26.1852	27.7728	29.5363	28.5064
orf19.2661	TLO34	Non-telomeric member of a family of telomere-proximal genes of unknown function; predicted N-terminus is extended, relative to that of other family members; overlaps orf19.2662	0.000886671	3.03343e-05	2.25124e-05	6.47026e-05	4.00092e-05	9.33971e-06	8.00069e-06	1.21815e-05
orf19.2662	orf19.2662	Predicted ORF of unknown function; overlaps TLO34/orf19.2661	80.2145	49.8792	107.329	104.574	74.9971	72.3893	76.2184	67.9071
orf19.2663	orf19.2663	Protein of unknown function	14.8046	14.9337	18.3396	17.5316	19.0467	17.3086	16.9934	18.6569
orf19.2664	orf19.2664	Protein of unknown function	32.8095	33.259	36.4375	37.2044	31.1463	31.3874	35.38	34.8215
orf19.2665	MSN5	Predicted karyopherin involved in nuclear import and export of proteins; flow model biofilm induced; Spider biofilm induced	59.7474	57.7868	48.2005	49.0642	48.3857	40.8276	45.3284	42.3364
orf19.2667	RPF1	Putative nucleolar protein with a predicted role in the assembly and export of the large ribosomal subunit; essential for growth; rat catheter and Spider biofilm induced	168.62	163.659	169.871	166.395	166.585	165.817	140.123	129.871
orf19.2668	RHD2	Predicted ORF in retrotransposon Tca4 with similarity to the Gag region encoding nucleocapsid-like protein; overlaps blocked reading frame orf19.2668.1; yeast-enriched transcript; rat catheter biofilm induced	27.2988	28.6018	17.1331	16.7032	16.1226	16.2626	17.2816	17.7009
orf19.2669	orf19.2669	ORF in retrotransposon Tca4; similar to Pol region of retrotransposons encoding reverse transcriptase, protease, integrase; downstream of RHD2, similar to the Gag region encoding nucleocapsid-like protein; rat catheter biofilm induced	9.87399	9.2619	6.11148	5.37423	4.5448	3.95086	3.94198	4.28091
orf19.267	orf19.267	Protein required for normal filamentous growth; mRNA binds She3	35.5107	31.8781	32.7949	33.591	21.9525	21.7814	21.4119	20.0214
orf19.2670	orf19.2670	Protein of unknown function	34.2597	38.2879	39.2	41.7001	46.157	42.4692	41.6984	46.4415
orf19.2671	orf19.2671	Protein with a predicted FAD-dependent pyridine nucleotide reductase domains; putative oxidoreductase; Plc1-regulated; possibly an essential gene, disruptants not obtained by UAU1 method	40.6981	40.5115	35.2634	39.399	23.8441	25.0097	22.4725	22.6439
orf19.2672	NCP1	NADPH-cytochrome P450 reductase, acts with Erg11p in sterol 14 alpha-demethylation in ergosterol biosynthesis; subject to hypoxic regulation; ketoconazole-induced; caspofungin repressed	179.022	170.36	142.67	144.928	190.043	162.565	165.616	165.23
orf19.2673	orf19.2673	Protein of unknown function	17.2069	16.8014	17.5306	16.9765	18.6806	19.718	18.1576	19.369
orf19.2674	orf19.2674	Putative transcription factor with zinc finger DNA-binding motif; Hap43p-repressed gene	12.9589	13.2321	17.9277	20.3126	12.8881	15.4922	9.10986	10.7985
orf19.2675	orf19.2675	Protein of unknown function	27.6641	25.1218	22.1488	22.4928	18.2363	16.7733	15.8227	15.3698
orf19.2676	orf19.2676	Predicted hexameric RecA-like ATPase Elp456 Elongator subcomplex subunit; required for modification of wobble nucleosides in tRNA; Spider biofilm induced	13.0788	15.8496	18.5065	19.8117	16.0121	18.5994	20.398	15.2235
orf19.2677	orf19.2677	Putative GPI transamidase component; possibly an essential gene, disruptants not obtained by UAU1 method	47.3617	43.906	43.7554	43.883	38.4374	36.7832	37.6464	34.9796
orf19.2678	BUB1	Putative cell cycle checkpoint kinase; mutation confers increased sensitivity to nocodazole	17.8004	16.6254	19.1877	20.0416	14.7421	13.7778	14.4004	13.4034
orf19.268	orf19.268	Protein of unknown function	18.2685	17.707	17.6424	17.85	13.524	14.6151	13.6861	13.858
orf19.2680	orf19.2680	Protein of unknown function	31.5232	30.2272	25.7682	26.6365	18.2363	17.7961	18.5917	19.4421
orf19.2681	RBT7	Protein with similarity to RNase T2 enzymes; has putative secretion signal; expression is Tup1-repressed	6.75857	4.87542	1.79071	1.54084	3.41238	2.51941	3.81803	2.75774
orf19.2682	orf19.2682	Protein of unknown function	91.4603	88.2212	57.6998	63.1312	84.334	76.0329	89.2069	88.6344
orf19.2684	orf19.2684	Protein of unknown function; flow model biofilm repressed	19.702	17.8624	27.7316	25.7918	28.4886	28.345	29.0299	30.746
orf19.2685	PGA54	GPI-anchored protein; Hog1-repressed; induced in cyr1 or efg1 mutant or in hyphae; colony morphology-related gene regulation by Ssn6; induced in RHE model; mRNA binds She3; regulated in Spider biofilms by Tec1, Egf1, Ntd80, Rob1, Brg1	53.188	38.2422	59.3251	65.6944	29.2097	25.604	23.505	24.0475
orf19.2686	orf19.2686	Protein of unknown function	110.214	117.317	82.7567	82.9607	110.929	98.6752	104.813	108.458
orf19.2687.1	orf19.2687.1	Protein of unknown function	148.018	168.372	220.796	195.634	193.576	276.377	212.546	236.766
orf19.2688	NAN1	Putative U3 snoRNP protein; Hap43p-induced gene; physically interacts with TAP-tagged Nop1p	61.4688	64.4616	59.0132	58.9526	36.5501	38.1603	34.697	32.5023
orf19.269	SES1	Seryl-tRNA synthetase; charges the tRNA that recognizes the CUG codon, which typically specifies Leu, but specifies Ser in C. albicans; complements S. cerevisiae ses1 mutant viability; soluble protein in hyphae; macrophage-regulated	286.041	283.328	341.621	338.134	350.54	326.689	335.753	332.933
orf19.2690	orf19.2690	Putative mitochondrial GTPase; required for mitochondrial morphology and genome maintenance; Spider biofilm induced	47.8078	47.9534	43.4095	41.0259	47.1651	45.0671	45.5432	47.6879
orf19.2691	orf19.2691	Planktonic growth-induced gene	64.0273	63.3066	52.9731	56.6162	77.7182	95.5966	90.1195	89.8323
orf19.2693	GST2	Glutathione S transferase; induced by benomyl and in populations of cells exposed to fluconazole over multiple generations; regulated by Nrg1, Tup1; induced by nitric oxide; stationary phase enriched; Spider biofilm induced	271.575	289.133	207.504	199.283	364.278	323.891	359.569	355.548
orf19.2694	TYS1	Putative tRNA-Tyr synthetase; downregulated upon phagocytosis by murine macrophages; stationary phase enriched protein; Spider biofilm repressed	170.051	167.127	189.728	189.918	164.333	152.327	145.359	158.489
orf19.2695	UBR1	Protein similar to S. cerevisiae Ubr1p ubiquitin-protein ligase; transposon mutation affects filamentous growth; Spider biofilm induced	23.9216	23.5467	26.3567	27.2783	20.5402	21.3279	23.3904	20.325
orf19.2697	orf19.2697	Protein of unknown function	16.2265	15.0758	17.4192	17.2664	13.2592	12.2675	13.6594	12.7644
orf19.2698	orf19.2698	Protein of unknown function	19.1895	26.6036	21.6668	22.445	36.7683	27.4708	34.3688	41.6545
orf19.2699	ABP1	Ortholog of S. cerevisiae Abp1; actin-binding protein of the cortical actin cytoskeleton; caspofungin induced; protein only detected in stationary phase yeast-form cultures; Spider biofilm repressed	360.289	318.594	274.839	281.983	288.777	249.232	217.533	232.185
orf19.27	orf19.27	Protein of unknown function	14.5422	11.8195	14.4392	13.8021	13.1997	14.159	15.2113	13.4591
orf19.270	orf19.270	Protein of unknown function	5.63978	4.62442	2.92933	2.48457	2.42243	2.05177	1.20009	3.51064
orf19.2701	orf19.2701	Protein of unknown function; Ras1 and Cyr1 repressed; rat catheter and Spider biofilm induced	9.94554	12.2441	5.14684	6.15399	10.1085	9.54187	11.07	12.2936
orf19.2703	orf19.2703	Specificity factor required for ubiquitination and sorting of specific cargo proteins at the multivesicular body; ortholog of S. cerevisiae Ear1; transcript regulated by iron; Ssr1-represssed; Spider biofilm induced	46.778	45.4511	34.2397	35.0482	33.2856	33.0994	33.6143	33.2979
orf19.2704	orf19.2704	Protein of unknown function	0	1.24251	0	1.50202	0.836834	0.744225	0.870607	0.943254
orf19.2706	CRH11	GPI-anchored cell wall transglycosylase, putative ortholog of S. cerevisiae Crh1p; predicted glycosyl hydrolase domain; similar to Csf4p and to antigenic A. fumigatus Aspf9; predicted Kex2p substrate; caspofungin-induced	79.8369	64.8328	54.7607	61.8165	44.3543	46.2193	36.7864	35.6995
orf19.2707.1	QCR9	Putative ubiquinol cytochrome c reductase; shows colony morphology-related gene regulation by Ssn6p	577.452	584.909	609.287	574.443	1087.89	1371.64	1270.04	1362.57
orf19.2708	orf19.2708	Protein of unknown function	93.6038	92.1387	83.1246	76.8407	91.429	98.7863	96.4537	97.4998
orf19.2709	ZUO1	Ortholog of S. cerevisiae Zuo1; a cytosolic ribosome-associated chaperone; likely to be essential for growth, based on an insertional mutagenesis strategy; Spider biofilm repressed	207.626	197.202	242.717	242.722	149.576	154.237	143.846	145.456
orf19.271	ADH4	Predicted 3-hydroxyacyl-CoA dehydrogenase; transcript is increased in azole-resistant strain overexpressing MDR1; transcript is increased in populations of cells exposed to fluconazole over multiple generations; mutant is viable	0.125059	0.12913	0.105168	0	0.173938	0.232034	0	0.294087
orf19.2710	orf19.2710	Protein of unknown function	200.496	178.668	136.181	127.712	301.683	251.314	272.627	288.816
orf19.2711	orf19.2711	Similar to S. cerevisiae Elp2, an Elongator complex subunit required for modification of wobble nucleosides in tRNA; repressed in core stress response	54.6234	56.7223	53.726	55.1038	36.754	31.1677	30.9273	30.2425
orf19.2711.1	MED20	Subunit of the RNA polymerase II mediator complex; involved in control of filamentous growth and Spider biofilm formation; rat catheter biofilm repressed	27.9298	24.2078	29.6592	29.179	38.5587	36.5645	41.2214	37.3128
orf19.2712	HCA4	Putative role in regulation of cell wall biogenesis; Hap43p-induced gene; possibly an essential gene, disruptants not obtained by UAU1 method; flow model and rat catheter biofilm induced	86.6617	81.819	82.8901	86.8316	60.1001	70.2584	61.5	55.969
orf19.2713	orf19.2713	Protein of unknown function	1.20246	1.04026	1.20251	1.35218	1.40123	1.94964	1.15212	1.35015
orf19.2715	RPC53	Protein of unknown function	41.0672	41.5455	47.5383	45.3803	29.3299	33.8648	27.4262	28.9328
orf19.2717	SAS10	Putative U3-containing small subunit processome complex subunit; Hap43p-induced gene; mutation confers resistance to 5-fluorocytosine (5-FC); repressed upon high-level peroxide stress	110.092	104.437	113.902	111.145	101.037	98.4812	86.4492	72.8097
orf19.272	FAA21	Predicted acyl CoA synthetase; upregulated upon phagocytosis; transcript regulated by Nrg1 and Mig1	14.5449	14.5521	16.2452	15.6994	21.2614	23.0173	22.5628	24.4202
orf19.2720	orf19.2720	Cytosolic chaperonin Cct ring complex subunit; role in the assembly of actin and tubulins; Spider biofilm repressed	135.863	121.787	138.036	143.511	109.344	118.503	120.698	116.406
orf19.2721	orf19.2721	Protein of unknown function	40.7174	42.2016	37.8657	34.8432	49.7802	45.0805	50.5641	56.5331
orf19.2722	CGR1	Negative regulator of yeast-form growth; HSP70 family member; induced by growth cessation at yeast-hyphal transition or in planktonic growth; physically interacts with Msi3p; similar to rat anti-aging gene, SMP30, stationary phase enriched	4.29909e-10	4.52043e-10	7.64754e-12	5.31383e-11	2.80118e-09	3.68538e-10	4.88197e-10	3.35987e-10
orf19.2723	HIT1	Ortholog of S. cerevisiae Hit1; protein of unknown function required for high temperature growth; flow model biofilm induced; Spider biofilm induced	32.9023	33.8498	35.7753	36.0968	54.2939	52.301	59.3094	59.2938
orf19.2724	orf19.2724	Protein of unknown function; flow model, rat catheter and Spider biofilm induced; Hap43-repressed	78.3337	81.9337	75.7637	72.7017	89.6786	121.733	113.435	106.219
orf19.2725	orf19.2725	Protein of unknown function	0	0	0	0	0.97191	0.432177	0.528231	0
orf19.2726	orf19.2726	Putative plasma membrane protein; Plc1-regulated; Spider biofilm induced	25.5938	26.3651	20.6697	21.938	20.9465	20.476	20.6236	17.6677
orf19.2727	GRX3	Putative glutaredoxin; flucytosine induced; regulated by Gcn4p; repressed in response to amino acid starvation (3-aminotriazole treatment)	73.9092	78.9819	117.364	119.33	105.867	107.496	115.381	107.77
orf19.2728	orf19.2728	Protein of unknown function	12.7084	12.727	12.7243	13.0863	17.6163	17.5331	20.0185	18.8238
orf19.273	orf19.273	Protein of unknown function	31.4981	33.1057	39.3642	35.6062	53.9545	59.2167	58.6418	55.9631
orf19.2730	orf19.2730	Protein of unknown function	36.3208	34.3741	30.3283	29.2295	21.9341	19.1372	18.6198	19.6717
orf19.2731	orf19.2731	Protein of unknown function	14.5557	22.3515	22.1794	20.4671	8.3438	14.1148	9.36081	13.0675
orf19.2733	orf19.2733	Putative subunit of phosphatidylinositol 3-kinase complexes I and II; transcription is activated in the presence of elevated CO2	10.1767	10.9841	12.9977	8.58541	15.6987	17.3241	20.3116	20.4497
orf19.2734	orf19.2734	Protein with a glucose/ribitol dehydrogenase family domain; mutants are viable	4.5927	5.30009	3.52141	2.86632	7.37408	9.35668	7.03646	7.78243
orf19.2735	SEN2	Putative tRNA splicing endonuclease subunit; mutation confers hypersensitivity to toxic ergosterol analog and to amphotericin B; 5'-UTR intron; Hap43-induced; Spider biofilm induced	54.9027	51.9145	37.7653	36.2055	31.2786	29.1882	28.8801	22.833
orf19.2736	HFL2	HAP5-like; ortholog of S. cerevisiae Bur6, a heterodimeric NC2 transcription regulator complex subunit; flucytosine induced	24.8778	25.4577	27.2842	29.7397	29.0833	32.2687	32.1914	37.0754
orf19.2737	orf19.2737	Carbohydrate kinase domain-containing protein; Spider biofilm induced	157.125	152.288	100.92	102.627	106.846	95.3236	89.3926	88.9404
orf19.2738	SUL2	Putative sulfate transporter; transcript negatively regulated by Sfu1; amphotericin B induced; F-12/CO2 and Spider biofilm induced	12.0319	12.2041	12.8208	12.5981	9.12456	9.18253	8.33985	7.45346
orf19.2739	orf19.2739	Protein of unknown function	14.1561	16.7958	21.0732	21.694	34.7004	29.7999	32.0932	31.9798
orf19.274	TFC4	Putative RNA polymerase III transcription initiation factor complex (TFIIIC) subunit; induced by Mnl1 under weak acid stress; possibly essential gene, disruptants not obtained by UAU1 method	33.78	31.9045	28.3672	24.9484	52.1363	48.3114	54.0696	52.7956
orf19.2740	orf19.2740	Protein of unknown function	10.89	9.40384	10.984	12.4872	8.49727	8.55916	8.91055	8.53624
orf19.2742	orf19.2742	Protein of unknown function	20.5361	27.0695	25.1696	23.4517	22.7892	28.7795	29.083	23.1186
orf19.2743	orf19.2743	Protein of unknown function	14.9224	16.2433	11.5627	12.9896	9.33685	7.77836	7.69487	6.75198
orf19.2745	UME7	Putative transcription factor with zinc cluster DNA-binding motif; similar to S. cerevisiae Ume6p, which is a transcription factor involved in the regulation of meiotic genes	1.09964	1.00927	0.719236	0.355853	1.14707	0.831217	0.662981	1.34083
orf19.2746	EMP70	Protein with a role in endosome-to-vacuole sorting; rat catheter biofilm repressed	35.4077	40.6304	41.1119	42.0287	43.1765	42.7737	47.6182	54.3782
orf19.2747	RGT1	Zn(II)2Cys6 transcription factor; transcriptional repressor involved in the regulation of glucose transporter genes; ortholog of S. cerevisiae Rgt1; mutants display decreased colonization of mouse kidneys	4.58265	3.82467	4.25309	4.20856	6.09305	8.28233	9.37959	8.8594
orf19.2748	ARG83	GAL4-like Zn(II)2Cys6 transcription factor; clade-associated expression; null shows abnormal regulation of invasive colony growth, is unable to utilize proline as a nitrogen source; flow model biofilm induced	3.19714	3.36908	5.0752	4.49014	7.68889	9.15043	11.3526	10.0152
orf19.2749	orf19.2749	BTB/POZ domain protein; induced by Mnl1 under weak acid stress; flow model biofilm induced; Spider biofilm induced	6.5322	6.44429	8.6477	8.50335	8.4556	9.19984	9.7561	9.53091
orf19.275	orf19.275	Protein of unknown function	7.49851	7.03226	8.7733	8.46441	4.71585	7.98467	5.37792	6.54223
orf19.2751	orf19.2751	Predicted membrane transporter; member of the monocarboxylate porter (MCP) family, major facilitator superfamily; Hap43-induced gene; alkaline upregulated by Rim101; possibly an essential gene, disruptants not obtained by UAU1 method	15.0014	14.9067	18.4482	16.0739	18.9857	20.2267	21.5609	22.1272
orf19.2752	ADR1	C2H2 transcription factor; ortholog of S. cerevisiae Adr1 but mutant phenotype suggests a different set of target genes; transposon mutation affects filamentous growth; Spider biofilm induced	9.3624	9.63229	11.5758	12.2688	10.4994	10.8086	13.7547	11.9537
orf19.2753	ZCF15	Predicted Zn(II)2Cys6 transcription factor of unknown function; rat catheter biofilm induced	11.1076	11.4691	9.67583	9.71102	7.34964	7.92762	8.69742	7.89856
orf19.2754	TIM13	Predicted mitochondrial intermembrane space protein with a role in protein import into mitochondria	25.9962	31.2771	47.2394	44.8637	38.0431	58.0196	64.7649	60.6892
orf19.2755	orf19.2755	Protein of unknown function	175.772	184.07	149.11	135.635	262.189	265.414	298.64	322.178
orf19.2756	orf19.2756	Protein of unknown function	12.26	15.7993	14.7057	13.4445	23.4627	29.2715	39.468	44.1023
orf19.2757	orf19.2757	Protein of unknown function	9.71848	11.9956	11.6014	11.7588	16.5466	20.6223	20.8108	23.9483
orf19.2758	PGA38	Putative adhesin-like GPI-anchored protein; repressed during cell wall regeneration; possibly an essential gene, disruptants not obtained by UAU1 method; rat catheter and Spider biofilm repressed	96.2718	91.7938	108.736	110.011	54.204	56.4266	51.9327	51.3405
orf19.276	orf19.276	Plasma membrane-associated protein; upregulated in an azole-resistant strain that overexpresses MDR1; Hap43-repressed; Spider biofilm induced	8.41408	8.52144	10.024	9.72454	9.49218	9.91615	11.4986	10.1497
orf19.2760	orf19.2760	Putative mRNA cleavage and polyadenylation factor; heterozygous null mutant exhibits hypersensitivity to parnafungin and cordycepin in the C. albicans fitness test	17.0017	15.8616	18.3258	18.242	16.1145	15.5866	16.7062	17.2856
orf19.2761	orf19.2761	Putative glycosylphosphatidylinositol (GPI) anchor assembly protein; transposon insertion causes decreased colony wrinkling but does not block true hyphal growth; induced by nitric oxide independent of Yhb1p	9.95074	13.3792	12.7025	11.6164	15.9807	18.2411	22.5818	21.4359
orf19.2762	AHP1	Alkyl hydroperoxide reductase; immunogenic; fluconazole-induced; amphotericin B, caspofungin, alkaline repressed; core stress response induced; Ssk1/Nrg1/Tup1/Ssn6/Hog1 regulated; flow model biofilm induced; rat catheter biofilm repressed	1916.14	1962.33	1458.56	1426.98	2705.9	2644.03	2805.73	2807.27
orf19.2763	orf19.2763	Protein not essential for viability; orf19.10279 possibly transcriptionally regulated upon hyphal formation	9.02528	8.75933	9.45868	9.81072	9.57479	9.58798	12.177	10.7924
orf19.2765	PGA62	Adhesin-like cell wall protein; putative GPI-anchor; fluconazole-induced; induced in high iron; induced during cell wall regeneration; Cyr1 or Ras1 repressed; Tbf1 induced	7098.07	5707.12	5227.02	5771.39	4477.22	4202.06	2992.18	2744.92
orf19.2766	orf19.2766	Dubious open reading frame	0.663539	0.685136	1.11599	0	0	0	0.480063	0
orf19.2767	PGA59	Adhesin-like cell wall protein; putative GPI-anchor; colony morphology-related gene regulation by Ssn6; Hap43-induced; Spider biofilm repressed	20109.3	17755.3	18604.9	19067.9	7416.52	8128.1	5535.06	5996.39
orf19.2768	AMS1	Putative alpha-mannosidase; transcript regulated by Nrg1; induced during cell wall regeneration; flow model biofilm induced; Spider biofilm induced	97.1568	92.9808	61.6454	62.5618	149.019	139.336	168.124	160.481
orf19.2769	orf19.2769	Putative protease B inhibitor; hyphal-induced expression; Cyr1p- and Ras1p-repressed	205.711	314.718	184.731	173.955	320.737	403.68	339.85	421.957
orf19.277	THI6	Putative thiamin-phosphate pyrophosphorylase, hydroxyethylthiazole kinase; fungal-specific; Spider biofilm induced	9.00645	8.6257	8.74474	8.50836	8.98646	8.15343	8.81401	8.69685
orf19.2770	orf19.2770	Protein of unknown function	12.3481	12.3319	14.0439	16.0867	30.6884	35.8055	35.808	33.7977
orf19.2770.1	SOD1	Cytosolic copper- and zinc-containing superoxide dismutase; role in protection from oxidative stress; required for full virulence; alkaline induced by Rim101; induced by human blood; rat catheter, flow model and Spider biofilm repressed	110.164	130.867	144.808	148.681	188.096	157.689	159.877	182.394
orf19.2771	BEM3	Putative GTPase-activating protein (GAP) for Rho-type GTPase Cdc42p; involved in cell signaling pathways that control cell polarity; similar to <iS. cerevisiae</i Bem3p	20.3866	21.642	22.2218	23.0962	19.1166	18.9632	20.7619	22.1093
orf19.2772	HOS3	Histone deacetylase; similar to S. cerevisiae Hos3p; greater expression and longer mRNA in white cells, compared to opaque cells; has conserved deacetylation motif	23.302	22.7985	25.0663	24.3021	29.0049	28.9988	31.66	28.3743
orf19.2774	LAB5	Protein of unknown function	138.075	150.062	122.78	133.319	105.224	94.8238	90.6296	85.8105
orf19.2775	IDI1	Protein of unknown function	80.7868	83.3526	114.663	124.752	106.272	118.959	120.868	125.684
orf19.2778	orf19.2778	Protein of unknown function; transcript is upregulated in clinical isolates from HIV+ patients with oral candidiasis	5.67209	8.12372	6.42878	7.35829	4.35016	5.53562	6.44334	5.44248
orf19.2779	orf19.2779	Protein of unknown function; Hap43-repressed gene	16.9288	21.311	13.2611	15.2449	12.0952	10.9001	10.0667	11.0885
orf19.278	orf19.278	Protein of unknown function; required for adhesion to abiotic substrate; Spider biofilm induced	7.75587	9.36182	3.5367	4.40868	4.36806	4.9994	3.95161	4.28135
orf19.2781	orf19.2781	Protein with predicted serine/threonine kinase and tyrosine kinase domains; possibly an essential gene, disruptants not obtained by UAU1 method; Spider biofilm induced	1.19434	1.1211	0.798929	0.926089	1.13259	1.42695	1.55143	1.0213
orf19.2782	orf19.2782	Protein of unknown function	61.847	62.2226	83.2656	81.4865	94.3597	116.835	115.665	118.868
orf19.2783	PIR32	Cell wall protein, putative structural component of the cell wall; mutation leads to increased chitin content, increased virulence and resistance to stresses; macrophage-induced gene	0.869819	0.759956	1.12533	0.890841	1.76815	1.20005	0.919753	1.46853
orf19.2784	orf19.2784	Protein of unknown function	0.717491	1.29648	2.03637	1.79473	3.05613	4.21555	5.0612	4.07749
orf19.2785	ATP7	Putative subunit of the F1F0-ATPase complex; colony morphology-related gene regulation by Ssn6; farnesol, macrophage-downregulated protein abundance; protein present in exponential and stationary yeast growth phases; Hap43-induced	160.005	154.492	117.56	104.832	449.34	388.033	435.214	411
orf19.2786	orf19.2786	Protein of unknown function	11.0129	10.7409	11.2235	10.9064	14.0282	14.7686	15.3043	15.1968
orf19.2787	PRY1	Pry family pathogenesis-related protein; extracellular; opaque specific transcript; repressed by alpha pheromone in SpiderM medium; possibly essential, disruptants not obtained by UAU1 method; Spider biofilm induced	0.553595	0.5081	1.03454	0.972519	0.941068	0.722799	0.80104	0.675019
orf19.2788	orf19.2788	Protein of unknown function	18.2219	18.8817	18.6925	15.7546	20.8951	19.8616	19.775	20.8173
orf19.2789	orf19.2789	Protein of unknown function	16.9287	14.9341	16.1711	13.4032	13.83	17.4836	16.8853	17.9077
orf19.279	orf19.279	Protein with a predicted D-Tyr-tRNA(Tyr) deacylase domain; Hap43-repressed gene	2.76887	1.78687	1.45529	1.44005	0.481385	0.214056	2.50406	0.813904
orf19.2790	SWD2	Protein of unknown function	43.4533	45.7758	56.3166	57.9229	37.8036	44.1739	42.2992	43.9441
orf19.2791	BBC1	Putative SH3-domain-containing protein	71.7825	58.9719	54.7649	58.3842	58.7264	55.1153	53.237	54.2566
orf19.2792	IST2	Protein of unknown function	28.5558	22.0957	24.1325	22.9004	28.8953	29.4249	27.4556	28.1412
orf19.2794	orf19.2794	Putative non-specific single-domain racemase; regulated by Gcn4p; repressed in response to amino acid starvation (3-AT treatment); alkaline upregulated; macrophage-induced protein	37.9048	39.1366	42.73	40.2839	54.6409	63.1396	72.5844	69.1071
orf19.2795	LHP1	Protein of unknown function	112.578	101.965	115.624	106.646	161.752	154.964	153.453	151.018
orf19.2796	orf19.2796	Protein of unknown function	9.25363	8.67577	12.731	11.7352	9.96166	9.59181	9.1854	10.3
orf19.2797	orf19.2797	Protein of unknown function	1.10879	0.00986151	0.451076	0.866693	0.864877	2.81136	1.50028	1.40003
orf19.2798	orf19.2798	Putative helicase; fungal-specific (no human or murine homolog)	10.8415	9.45949	13.5315	15.0761	9.18222	10.1466	9.26289	9.8727
orf19.2799	GPI8	Protein similar to S. cerevisiae Gpi8p, which is a subunit of the GPI transamidase complex that adds GPI anchors to proteins; likely to be essential for growth, based on an insertional mutagenesis strategy	23.2359	25.8494	24.8727	28.006	24.0719	20.8437	25.2709	25.6102
orf19.28	orf19.28	Putative thiamine transmembrane transporter; Spider biofilm induced	23.8313	24.0943	20.5974	21.5524	19.7954	19.2423	21.1331	15.9562
orf19.280	orf19.280	Protein of unknown function	7.96051	7.50486	8.73173	6.04822	3.129	5.3514	2.25366	6.51123
orf19.2803	HEM13	Coproporphyrinogen III oxidase; antigenic; on yeast cell surface, not hyphae; iron-regulated expression; Hap43, macrophage-repressed; farnesol-induced; possibly essential; flow model biofilm induced; rat catheter, Spider biofilm repressed	1346.76	1410.95	1279.2	1315.55	1453.23	1424.74	1307.62	1306.98
orf19.2804	orf19.2804	Protein of unknown function	0.108083	0.111601	0	0	0	0.334228	0.078197	0.762499
orf19.2805	PEX8	Putative peroxisomal biogenesis factor; expression regulated during planktonic growth	7.47759	8.25248	7.5413	7.48489	9.59001	10.6232	11.2315	10.6822
orf19.2808	ZCF16	Predicted Zn(II)2Cys6 transcription factor; mutants are viable; rat catheter biofilm induced	5.62706	5.97355	7.46862	8.55635	6.99344	7.72897	8.45288	7.29824
orf19.2809	CTN3	Peroxisomal carnitine acetyl transferase; no obvious metabolic, hyphal, virulence defects in Ura+ strain; induced by macrophage engulfment, hyphal growth, starvation, nonfermentable carbon sources; rat catheter, Spider biofilm induced	3.54839	3.66388	2.62009	3.28883	8.36587	6.56581	5.99019	6.49003
orf19.281	orf19.281	Protein of unknown function	12.1036	13.3252	8.49323	11.6059	5.40701	4.90779	3.59551	5.08932
orf19.2810	AAP1	Putative amino acid permease; fungal-specific; possibly essential, disruptants not obtained by UAU1 method; Spider biofilm induced	3.72967	3.46163	1.90301	1.49949	2.73941	2.41034	2.60742	2.13517
orf19.2812	orf19.2812	Protein of unknown function; Spider biofilm induced	6.19039	5.57371	4.95588	5.43972	5.16592	5.60497	6.091	4.81358
orf19.2813	orf19.2813	Protein of unknown function	160.362	206.976	157.33	144.563	288.091	231.415	251.376	199.027
orf19.2818	orf19.2818	Protein of unknown function	12.0131	10.6047	11.3529	10.8473	9.25907	10.3613	9.44784	9.90835
orf19.2819	orf19.2819	Protein of unknown function	1.77103	2.39135	3.2078	3.74104	3.97907	5.64512	6.11093	7.79552
orf19.2820	orf19.2820	Protein of unknown function	86.7072	79.0539	88.9966	88.8181	64.6249	66.6168	63.167	58.9483
orf19.2821	orf19.2821	Protein of unknown function; Hap43-repressed gene; repressed by nitric oxide	110.581	112.503	116.517	109.233	218.279	219.183	228.977	241.872
orf19.2822	orf19.2822	Essential component of the conserved oligomeric Golgi complex; role in fusion of transport vesicles to Golgi compartments; rat catheter biofilm repressed	6.86894	7.79572	5.55019	5.33769	18.7363	17.3323	17.7474	21.2161
orf19.2823	RFG1	HMG domain transcriptional repressor of filamentous growth and hyphal genes; in Tup1-dependent and -independent pathways; binds DNA; transcript not regulated by oxygen or serum; not responsible for hypoxic repression; Spider biofilm induced	26.6241	22.7989	21.2549	20.284	15.7995	19.086	18.6459	16.2875
orf19.2825	DRE2	Putative cytosolic Fe-S protein assembly protein; a-specific transcript; regulated by Sef1, Sfu1, and Hap43; rat catheter and Spider biofilm induced	19.51	19.9541	22.8995	22.1596	42.7929	46.4064	50.5407	49.3946
orf19.2826	orf19.2826	Protein of unknown function	23.6237	22.0462	22.6382	24.2883	20.9027	22.9318	22.8328	22.7624
orf19.2827	orf19.2827	Protein of unknown function	6.53484	5.78901	10.623	10.4297	5.88999	7.28107	7.19944	6.84779
orf19.2828	orf19.2828	Protein of unknown function	14.3184	15.4698	16.2417	14.9301	28.4006	28.4441	31.16	27.6435
orf19.2829	orf19.2829	Protein of unknown function	67.9317	65.368	72.5368	58.2552	165.269	154.994	169.721	173.891
orf19.2830	RRP9	Ribosomal protein; mutation confers resistance to 5-fluorocytosine (5-FC), 5-fluorouracil (5-FU), and tubercidin (7-deazaadenosine); physically interacts with TAP-tagged Nop1; Hap43-induced; Spider biofilm induced	56.8901	57.3568	56.3035	58.7062	38.1553	36.6824	32.8387	28.2381
orf19.2831	RPC31	Putative RNA polymerase III subunit C31; repressed by nitric oxide; induced during infection of murine kidney, compared to growth in vitro; has murine homolog	54.5605	58.1127	66.3394	55.6026	66.7507	67.7991	59.893	61.8347
orf19.2832	INN1	Protein with similarity to S. cerevisiae Inn1p, which is an essential protein of the contractile actomyosin ring required for ingression of the plasma membrane into the bud neck during cytokinesis; contains a C2 membrane targeting domain	0.90466	0.471908	1.51825	0.75285	2.1976	4.17809	1.95806	2.76812
orf19.2833	PGA34	Putative GPI-anchored protein; transcript repressed by alpha pheromone in SpiderM medium; induced in oralpharyngeal candidasis; flow model biofilm induced; Spider biofilm induced	0	0	0.157204	0.0518528	0.260003	0.115615	0.405744	0
[truncated: 4,559 more rows]
